# Supplementary material for: Soil-borne fungi alter the apoplastic purinergic signaling in plants by deregulating the homeostasis of extracellular ATP and its metabolite adenosine
Source: eLife. 2023 Nov 23;12:e92913. doi: 10.7554/eLife.92913 (PMC10746138; doi:10.7554/eLife.92913)
Supplement: Figure 1—figure supplement 1—source data 1. [file elife-92913-fig1-figsupp1-data1.xlsx]

## Sheet: Sheet1
Figure 1-Suppl 1-source data 1
	relative expression ENT3 and NSH3 upon infection over time
	dpi	ENT3 control				ENT3 - Fo5176
	0	0.01667	0.00239	0.00016	0.00032	0.00982	0.01418	0.00143	0.00197
	1	0.02363	0.01648	0.0007	0.00013	0.00014	0.00711	6e-05	0.00028
	2	0.01584	0.0201		0.00034	0.02562	0.0025	6e-05	0.00039
	3	0.00996	0.01203	0.00149	0.00055	0.02169	0.00579	0.0016	0.00032
	4	0.01266	0.00743	0.00382	0.00061	0.00964	0.01919	0.00016	0.00011
	6	0.05243	0.00835	0.00161	0.00026	0.00341	0.00039		0.00025
		NSH3 control				NSH3 - Fo5176
	0	1.16	0.78	0.69	0.15	1.95	3.39	0.62	0.33
	1	1.67	0.91	0.38	0.1	0.03	0.68	0.13	0.14
	2	1.09	1.82		0.16	2.71	0.52	0.83	0.07
	3	1.56	2.23	1.09	0.19	3.15	0.3	0.65	0.24
	4	1.92	1.05	0.64	0.19	0.52	1.26	0.26	0.03
	6	5.41	1.73	0.54	0.15	0.45	0.16	0.24	0.04
