# Supplementary material for: Soil-borne fungi alter the apoplastic purinergic signaling in plants by deregulating the homeostasis of extracellular ATP and its metabolite adenosine
Source: eLife. 2023 Nov 23;12:e92913. doi: 10.7554/eLife.92913 (PMC10746138; doi:10.7554/eLife.92913)
Supplement: Figure 1—figure supplement 2—source data 1. [file elife-92913-fig1-figsupp2-data1.xlsx]

## Sheet: Sheet1
Figure 1-Suppl 2-source data 1
	A - cumulative vascular penetrations on differentially concentrated ATP plates							B - cumulative vascular penetrations on differentially concentrated Ado + ATP plates
		dpi							dpi
		3	4	5	6	7			3	4	5	6	7
	mock	0	0	1	1	2		mock	0	0	1	1	2
		0	0	1	2	2			0	1	1	2	2
		0	0	0	0	0			0	0	0	1	1
		0	0	0	1	1			0	0	0	0	1
		0	0	0	1	2			1	1	1	1	3
		0	0	0	1	1			0	0	0	0	1
		0	0	0	0	0			0	0	0	0	1
		0	0	0	0	1			0	0	0	0	0
		0	0	0	1	2			0	0	0	1	1
		0	0	0	1	2			0	0	0	0	1
		0	0	0	0	1			0	0	0	0	1
		0	0	0	1	2			0	0	0	0	1
		0	0	1	1	2			0	0	0	0	0
		0	0	0	0	0			0	0	0	0	1
		0	0	1	3	3			0	1	1	2	2
		0	0	1	1	2			1	1	2	2	3
		0	0	0	1	3			0	0	0	0	1
	10 µM ATP	0	0	0	1	2			0	1	1	1	1
		0	0	0	1	1			0	0	0	1	1
		0	1	2	3	3			0	0	1	2	2
		0	0	1	2	3			0	0	0	0	0
		0	0	0	1	1			0	0	0	1	1
		0	0	0	1	2			0	0	1	1	2
		0	0	0	0	0			0	0	0	0	0
		0	0	0	1	1			0	0	0	0	0
		0	0	0	1	2			0	0	0	0	0
		0	0	0	1	1			0	0	0	0	0
		0	0	0	0	1			0	1	1	2	2
		0	0	0	1	1			1	2	4	4	4
		0	0	0	1	3			0	0	0	0	1
		0	0	0	1	2			0	0	0	1	2
		0	0	0	0	0			0	0	0	2	2
		0	0	0	0	0		500 µM ATP	0	0	0	0	1
		0	0	1	1	1			0	0	0	0	0
	100 µM ATP	0	0	0	1	1			0	0	0	0	0
		0	0	0	0	0			0	0	0	0	1
		0	0	0	1	2			0	0	0	0	1
		0	0	0	0	0			0	0	0	0	0
		0	0	0	2	3			0	0	0	0	1
		0	0	0	0	0			0	0	0	0	0
		0	0	1	1	1			0	0	0	0	1
		0	0	0	0	0			0	0	0	0	0
		0	0	0	0	1			0	0	0	1	1
		0	0	0	1	2			0	0	0	1	1
		0	1	1	2	2			0	0	0	1	1
		0	0	0	0	1			0	0	0	0	0
		0	0	0	0	1			0	0	0	0	0
		0	0	1	2	2			0	0	0	0	0
		0	0	0	0	0			0	1	1	1	1
		0	0	0	2	2			0	0	0	0	0
	300 µM ATP	0	0	0	0	0			0	0	0	0	1
		0	0	0	2	2			0	0	1	1	1
		0	0	0	2	2			0	0	0	0	0
		0	0	0	1	1			0	0	0	0	1
		0	0	0	0	1			0	0	0	0	0
		0	0	1	1	1			0	0	0	0	1
		0	0	0	0	0			0	0	0	0	0
		0	0	0	0	1			0	0	0	0	1
		0	0	0	0	1			0	0	0	0	0
		0	0	0	0	1			0	0	0	0	0
		0	0	0	0	1			0	0	0	0	0
		0	0	0	0	1			0	0	0	1	2
		0	0	0	0	0			0	0	0	0	0
		0	0	0	1	1		500 µM ATP + 500 µM Ado	0	0	0	0	2
		0	0	1	1	1			0	0	0	0	0
		0	0	0	1	1			0	0	0	0	2
		0	0	0	0	0			0	0	0	0	0
	500 µM ATP	0	0	0	1	1			0	0	0	1	1
		0	0	0	0	0			0	0	0	0	1
		0	0	0	1	1			0	0	0	0	0
		0	0	0	0	0			0	0	0	0	0
		0	0	0	0	0			0	0	0	0	1
		0	0	0	0	1			0	0	0	0	0
		0	0	0	2	3			0	0	1	1	1
		0	0	0	0	0			0	0	0	0	1
		0	0	0	0	1			0	0	1	1	1
		0	0	0	0	0			0	0	0	0	1
		0	0	0	0	0			0	0	0	0	0
		0	0	0	2	2			0	0	0	0	0
		0	0	0	1	1			0	0	0	0	0
		0	0	0	0	0			0	0	0	0	0
		0	0	0	0	0			0	0	0	0	0
		0	0	0	0	2			0	0	0	0	2
		0	0	0	0	0			0	0	0	0	0
		0	0	0	0	0			0	0	0	0	0
		0	0	1	2	2			0	0	0	0	0
		0	0	0	0	0			0	0	1	1	1
		0	0	0	0	0			0	0	0	1	1
		0	0	0	0	0			0	0	1	1	1
		0	0	0	1	1			0	0	0	0	0
		0	0	0	0	0			0	0	0	0	0
		0	0	0	0	1			0	1	1	2	2
		0	0	1	2	2			0	0	0	0	0
		0	0	0	0	0			0	0	0	0	0
		0	0	0	1	1			0	1	1	1	1
		0	0	0	0	0			0	0	1	1	1
		0	0	0	0	0			0	0	0	0	0
		0	0	1	1	1		500 µM ATP + 750 µM Ado	0	0	0	1	1
		0	0	0	0	0			0	0	0	0	1
		0	0	0	0	0			0	0	0	1	1
		0	0	0	1	1			0	0	1	1	1
		0	1	2	2	2			0	0	0	0	1
		0	0	0	1	1			0	0	0	0	1
		0	0	0	0	0			0	0	1	1	1
		0	0	0	0	0			0	0	0	1	1
		0	0	0	0	0			0	0	0	0	0
		0	0	0	2	2			0	0	0	1	2
		0	0	0	0	0			0	0	0	0	1
		0	0	0	1	1			0	0	0	0	0
		0	1	1	2	2			0	0	0	0	1
		0	0	0	0	0			0	0	1	2	2
		0	0	0	0	0			0	0	0	0	0
		0	0	0	1	2			0	0	0	0	0
		0	0	1	1	2			0	0	0	0	1
		0	0	0	0	0			0	0	0	0	0
		0	0	0	0	1			0	0	0	1	1
		0	0	1	2	2			0	0	1	1	1
		0	0	1	1	1			0	0	0	0	0
		0	0	1	2	2			0	0	0	1	1
									0	0	0	0	0
									0	0	0	0	0
									0	0	0	1	1
									0	0	0	0	0
									0	0	0	1	1
									0	0	1	2	2
									0	0	0	0	0
									0	0	2	2	2
									0	0	0	0	0
									0	0	0	0	0
									0	0	0	1	1
								500 µM ATP + 1 mM Ado	0	0	0	1	1
									0	0	0	1	3
									0	0	1	2	2
									0	0	0	0	2
									0	0	0	0	0
									0	0	0	0	0
									0	0	0	0	1
									0	0	0	0	0
									0	0	0	0	1
									0	0	0	1	1
									0	0	0	0	0
									0	0	0	0	1
									0	0	0	0	0
									0	0	0	0	0
									0	0	0	0	0
									0	0	0	0	1
									0	0	0	0	2
									0	0	0	0	0
									0	0	2	2	2
									0	0	0	0	0
									0	0	0	1	1
									0	0	0	0	0
									0	1	1	1	1
									1	2	2	3	3
									0	0	1	1	2
									0	0	0	0	1
									0	0	0	2	2
									0	0	0	1	2
									0	1	1	1	1
									0	0	0	0	0
									0	1	1	1	2
									0	0	1	1	1
									0	0	0	1	1
									0	0	1	1	1
