# Supplementary material for: Soil-borne fungi alter the apoplastic purinergic signaling in plants by deregulating the homeostasis of extracellular ATP and its metabolite adenosine
Source: eLife. 2023 Nov 23;12:e92913. doi: 10.7554/eLife.92913 (PMC10746138; doi:10.7554/eLife.92913)
Supplement: Figure 1—source data 1. [file elife-92913-fig1-data1.xlsx]

## Sheet: Sheet1
Figure 1-source data 1
	A - LC-MS ion chromatogram							B,C - rel. expression of Fo5'NT and FoENT in roots after treatment with Fo5176 spores								F - Rootgrowth of plants on treatment plates							G - Colony diameter of Fo5176 grown on treatment plates
	Retention time [min]	Counts half MS (ESI EIC) 268.1	Counts half MS plant (ESI EIC) 268.1	Counts half MS fungi (ESI EIC) 268.1	Counts half MS adenosine 250 ng (ESI EIC) 268.1	Counts half MS plant fungi (ESI EIC) 268.1		dpt	Fo5'NT			FoENT					primary root growth [mm]							Colony diameter [mm]
	0.243	0	0	0	0	0		1	0.00122068	0.040807	0.021279	0.00122068	0.0330654	0.03488			3	4	5	6	7		1/2 MS	18.2287
	0.248	0	0	0	0	0		2	0.00424147	0.00396747	0.00157858	0.040807	0.0238373	0.019838		mock	24.2307	34.7931	47.6882	58.6577	73.6162			18.7491
	0.254	0	0	0	0	0		3	0.0814554	0.124478	0.0540193	0.0265254	0.0267031	0.017591			20.5748	32.5886	44.4891	57.5651	74.6048			18.2245
	0.259	420	0	0	228.929	214.896		4	0.854755	0.447207	0.647855	0.0395989	0.0493622	0.0369172			11.7906	19.1561	31.2596	44.2079	59.6557			18.4021
	0.265	779.573	1133.18	1103.98	0	962.696		6	0.835008	0.694914	0.574475	0.13	0.0625686	0.0634099			4.2591	9.4521	18.5051	27.9067	40.3769		1 mM Ado	17.6917
	0.27	0	1011.2	935.125	0	1064.42											8.528	18.8935	29.9549	41.6384	56.6693			17.0755
	0.276	875.748	0	0	1158.28	1059.58											3.4977	5.0861	6.6473	13.5599	21.2446			17.9376
	0.281	1063.86	828.24	1391.57	1224.97	481.495		D - cumulative vascular penetrations after transfer to treatment plates									3.5585	5.6677	10.7475	18.2138	27.2434			16.8338
	0.287	948.717	420.143	955.604	0	1125.21											11.1291	17.2383	23.0956	32.7974	46.4281		500 µM ATP	4.6855
	0.292	1223.56	548.728	0	0	903.513			dpi								3.8051	8.6853	14.7275	23.0493	32.6488			3.9913
	0.298	483.765	520.132	0	1339.6	827.394			3	4	5	6	7				20.613	30.2781	41.0266	52.0677	64.056			4.3419
	0.303	988.945	0	1193.94	711.699	1157.24		mock	0	0	0	0	0				17.6113	26.4953	37.3898	49.6161	59.5144			5.0325
	0.309	0	1329	0	1816.48	1044.27			0	0	0	0	1				23.2843	32.8667	44.0209	56.0427	69.0466		500 µM ATP + 1 mM Ado	5.3796
	0.314	998.831	0	1573.9	1012.04	991.969			0	0	0	0	0				22.2109	33.0706	45.3867	58.461	60.5368			3.4707
	0.32	1212.66	890.227	774.197	1148.87	0			0	0	0	1	2				18.6266	27.9015	38.2814	51.1557	76.7563			5.0355
	0.325	0	1385.49	1123.97	0	832.31			0	0	2	2	3				23.2294	33.2889	43.7176	55.1306	67.8621			4.3419
	0.331	1482.84	1483.57	1492.51	1592.73	650.488			0	0	0	0	1				22.991	33.3264	45.2189	56.2819	69.4065
	0.336	1171.39	1228.33	1147.24	1174.08	1120.53			0	0	1	2	4				24.2643	34.821	45.7753	56.0865	70.6706
	0.342	1365.81	559.112	897.492	794.689	0			0	1	1	1	3				23.9751	33.9757	46.0364	59.4261	73.8772
	0.347	685.76	478.595	1011.25	1230.44	1008.89			0	0	0	1	2				24.0928	33.7888	46.4683	59.8895	73.9225
	0.353	1061.41	1052.89	1127.45	895.731	1231.49			0	0	0	1	1				22.1407	33.3897	45.3573	57.6596	69.5289
	0.358	1491.94	919.552	714.687	817.184	755.706			0	0	0	0	1				15.6047	25.4529	34.4535	41.9693	46.3541
	0.364	255.032	355.031	1078.13	1016.91	515.19			0	0	0	1	1				22.5967	31.902	42.33	55.3201	68.0144
	0.369	272.812	332.28	675.711	0	0			0	0	0	0	0				19.745	30.221	37.4221	51.7782	62.9996
	0.375	348.273	0	0	785.706	685.218			0	0	1	2	3				21.9869	32.6935	43.0785	56.8878	69.6656
	0.38	317.781	0	552.09	0	281.892			0	0	0	0	1				20.3634	30.7699	41.8438	53.525	64.432
	0.386	0	0	272.018	650.443	0			0	0	1	2	2				23.2162	32.288	44.664	56.0142	67.0693
	0.391	0	0	0	411.612	0			0	0	0	0	1				19.5747	29.4767	39.4123	51.7999	61.1068
	0.397	0	0	0	369.211	0			0	0	1	1	1				19.0122	31.8557	43.5611	53.769	57.1162
	0.402	0	0	0	250.901	0			0	0	0	0	2				26.6224	36.3243	45.9795	55.8991	62.213
	0.408	230.553	0	0	252.855	0			0	0	0	1	1				21.6448	31.9064	41.0994	54.2196	62.3021
	0.413	0	0	0	0	0			0	1	2	2	3				17.4315	25.3303	32.2962	38.1887	44.7993
	0.419	272.344	0	0	221.407	220.021			0	1	2	3	3				20.5054	29.5485	38.856	45.7661	59.8345
	0.424	0	0	0	0	0			0	1	1	2	2				20.244	30.3643	42.009	53.1207	63.4717
	0.43	0	0	0	639.2	0			0	1	2	3	3				21.5229	32.1319	43.1602	55.1591	67.1019
	0.435	0	0	0	559.606	0			0	0	1	2	2				26.2292	37.8651	50.3476	61.6806	67.6597
	0.441	0	0	250.316	682.246	0			0	0	0	2	2				29.9273	43.9844	58.1398	64.9246	69.764
	0.446	0	0	0	543.676	0			0	0	0	0	0				27.9177	39.5033	52.5799	68.1499	77.9323
	0.452	0	0	349.522	875.304	475.932			0	0	0	2	2				30.4742	42.7317	55.2727	70.085	76.9699
	0.457	0	0	980.092	982.78	0			0	0	0	1	1				31.8502	44.9341	58.9917	64.2848	67.6003
	0.463	1533.07	0	889.197	1185.26	1103.03			0	0	1	1	2				33.0115	45.6309	57.4977	61.4464	70.8263
	0.468	0	0	931.001	1154.49	1566.82			0	1	1	2	2				29.2449	40.3982	53.287	66.0998	79.2911
	0.474	1341.58	969.431	1796.3	1179.26	0			0	0	0	0	0				30.2541	42.677	56.6479	71.5914	73.3141
	0.479	2201.26	0	1758.48	1486.52	0			0	0	0	1	1				23.9006	35.2775	47.6157	61.3646	73.0294
	0.485	1821.52	1408.5	1061.6	913.881	0			0	0	0	1	1				27.7459	40.0255	53.3394	69.2358	78.0096
	0.49	0	0	0	1816.81	0			0	1	1	1	1				25.4274	36.7245	49.5818	64.2556	79.595
	0.496	0	1032.27	1693.53	1898.96	0			0	0	0	0	0				29.9201	41.2992	54.2144	68.9986	79.4577
	0.501	0	0	1494.78	0	2585.72			0	0	0	0	0				21.2812	25.4104	26.6104	32.2115	43.2489
	0.507	0	1727.04	2243.47	1468.36	0			0	0	0	1	1			mock + Fo5176 pSIX::GFP	23.1253	24.9567	24.9567	24.9567	24.9567
	0.512	2846.08	1695.6	2463.55	1913.28	0			0	0	1	2	3				22.5907	28.6983	35.8015	41.5809	49.9569
	0.518	3333.83	0	2142.39	1637.35	0			0	0	0	0	0				25.9774	31.6285	38.1987	42.9151	48.6768
	0.523	2637.43	2055.63	2569.72	1848.06	2908.04			0	0	0	2	3				25.2659	31.1268	38.5447	44.1976	50.3375
	0.529	1806.9	0	2818.8	1670.29	0			0	0	0	0	0				21.9132	26.0498	40.1094	47.4675	52.6209
	0.534	2351.26	2211.98	2465.68	1338.67	0			0	1	3	5	5				19.6027	21.0281	25.0596	26.9314	30.6466
	0.54	1693.92	2182.98	2598.88	1826.36	2383.7			0	0	0	0	0				23.8392	28.4086	32.9163	32.9163	32.9163
	0.545	1893.13	2500.64	1376.03	988.772	0			0	0	0	1	4				24.4185	28.1806	37.4334	43.726	49.291
	0.551	1689.08	2145.54	1413.09	1177.77	2496.8			0	1	2	2	3				9.4057	15.6803	17.9574	19.6315	21.175
	0.556	1448.27	0	2149.17	1054.52	1656.15			0	0	0	0	0				21.1206	26.6286	35.1266	37.1425	44.6042
	0.562	1419.29	2345.91	1216.75	1182.89	0		500 µM ATP	0	0	0	1	1				26.6653	30.6004	36.6132	44.7028	50.0035
	0.567	1571.91	2038.16	2414.81	1318.1	2380.65			0	0	0	0	0				22.703	33.3208	46.2759	54.9416	59.971
	0.573	1598.91	1419.61	1376.23	966.165	1873.04			0	0	0	1	1				25.7358	31.6132	37.8765	41.2247	45.7247
	0.578	882.76	1396.83	2411.96	817.805	2457.17			0	0	0	0	0				21.0475	31.5402	37.4591	43.9636	47.9341
	0.584	1600.94	0	1710.14	0	2262.64			0	0	0	0	0				24.8589	30.1631	37.9798	44.3905	51.2673
	0.589	924.606	1504	2103.73	893.836	1990.26			0	0	0	0	1				25.1118	29.9422	39.3232	46.0197	50.6425
	0.595	1552.7	1558.35	1438.96	0	1678.25			0	0	0	2	3				21.9395	27.6043	29.7871	29.7871	29.7871
	0.6	975.925	1566.95	1398.86	1678.78	2101.04			0	0	0	0	0				15.5049	21.804	28.0134	31.5155	34.8727
	0.606	687.619	1724.58	1300.47	943.779	0			0	0	0	0	1				18.3316	23.3056	31.2996	37.565	42.4842
	0.611	927.914	1309.12	1174.7	1398.26	1332.53			0	0	0	0	0				13.1957	14.2574	14.2574	14.2574	14.2574
	0.617	910.696	1112.12	1126.04	1486.99	0			0	0	0	0	0				18.1671	21.9949	24.9306	26.2435	26.2435
	0.622	1382.04	1504.45	1656.56	0	1442.59			0	0	0	2	2				17.1335	21.325	24.6821	25.995	27.0874
	0.628	978.102	1595.55	1280.88	1163.75	826.212			0	0	0	1	1				12.9167	14.9277	14.9277	14.9277	14.9277
	0.633	0	0	1478.14	0	1165.89			0	0	0	0	0				14.2744	15.8193	15.8193	15.8193	15.8193
	0.639	877.322	931.448	1125.3	0	1588.56			0	0	0	0	0				10.8662	12.9894	12.9894	12.9894	12.9894
	0.644	960.598	1029.31	0	725.393	1209.16			0	0	0	0	2				16.559	20.7505	25.8808	29.7516	31.5723
	0.65	1029.9	1212.09	1211.56	889.868	0			0	0	0	0	0				14.6761	17.6898	17.6898	17.6898	17.6898
	0.655	0	218.982	0	711.793	0			0	0	0	0	0				12.5765	17.5774	17.9387	17.9387	17.9387
	0.661	1228.53	709.077	1638.37	682.829	1458.26			0	0	1	2	2				21.1727	27.0571	28.1187	28.1187	28.1187
	0.666	785.918	1069.24	0	1156.64	0			0	0	0	0	0				17.9446	25.9617	29.7634	32.6425	37.1663
	0.672	357.758	0	1291.17	1116.16	0			0	0	0	0	0				18.9587	26.0803	29.8293	37.6603	43.3308
	0.677	546.846	0	1352.71	1003.34	0			0	0	0	0	0				18.5404	25.7	29.2021	35.4556	41.3776
	0.683	0	794.717	1652.24	706.927	0			0	0	0	1	1				15.4683	22.6418	24.7176	24.7176	24.7176
	0.688	952.188	1092.91	935	699.628	1385.28			0	0	0	0	0				16.7718	23.3443	24.4958	25.9972	26.1445
	0.694	0	734.008	1813.97	1115	1611.09			0	0	0	0	1				19.7792	26.8605	27.9221	27.9221	27.9221
	0.699	806.045	1393.69	0	855.111	1544.37			0	0	1	2	2				18.2805	22.346	27.1975	30.9235	32.7417
	0.705	535.725	1109.14	1571.37	0	1261.43			0	0	0	0	0				22.9888	27.2294	33.481	36.4127	38.6096
	0.71	0	620.005	0	1399.23	995.944			0	0	0	1	1				24.3147	31.5713	35.6893	38.3115	38.8257
	0.716	0	578.373	1385.44	1210.07	0			0	0	0	0	0				18.7149	19.2899	19.2899	19.2899	19.2899
	0.721	612.303	0	1704.39	1106.39	985.222			0	0	0	0	0				18.4453	23.0829	24.3686	25.6797	25.6797
	0.727	0	425.717	1177.43	1301.14	764.79			0	0	1	1	1				26.7326	34.1405	36.2608	37.5465	38.6314
	0.732	0	533.438	991.089	1723.05	0			0	0	0	0	0				26.4672	32.7997	37.698	43.8918	49.3721
	0.738	0	0	840.756	0	0			0	0	0	0	0				19.0888	21.5431	22.6272	22.6272	22.6272
	0.743	0	0	675.31	1479.07	0			0	0	0	1	1				11.5319	11.5319	11.5319	11.5319	11.5319
	0.749	0	1020.38	583.098	2126.86	0			0	1	2	2	2				12.5718	15.0677	19.3287	22.9934	23.9929
	0.754	1181.02	0	0	3188.36	0			0	0	0	1	1				12.6702	15.0577	15.8243	15.8243	15.8243
	0.76	1301.94	0	893.403	4835.9	0			0	0	0	0	0				13.2599	15.5597	16.8652	17.7883	17.7883
	0.765	0	1969.53	0	0	0			0	0	0	0	0				14.7794	19.2396	25.0952	29.4059	33.0057
	0.771	0	1273.73	1564.02	3758.69	0			0	0	0	0	0				17.5667	20.9451	21.4299	21.4299	21.4299
	0.776	1143.31	2117.89	0	3849.23	0			0	0	0	2	2				15.1062	18.1879	22.1305	22.1305	22.1305
	0.782	2217.12	1559.5	0	4651.6	3409.49			0	0	0	0	0				14.833	19.7235	22.9267	23.9694	23.9694
	0.787	0	0	0	3971.98	0			0	0	0	1	1			500 µM ATP	10.0923	13.9016	15.493	18.476	24.9145
	0.793	2657.74	0	0	3773.25	2938.36			0	1	1	2	2				1.755	3.7984	7.1488	13.0895	19.633
	0.798	3344.4	2527.89	0	3207.63	2313.35			0	0	0	0	0				8.9137	14.1539	16.3113	21.726	27.4817
	0.804	0	1745.2	1089.34	3573.02	3104.21			0	0	0	0	0				2.1093	2.8493	9.1401	14.8784	20.477
	0.809	1943.13	2233.19	653.367	2959.87	3026.71			0	0	0	1	2				4.4554	8.3447	10.9214	15.6425	22.737
	0.815	2307.71	2334.74	1203.76	2215.7	2727.24			0	0	1	1	2				7.6652	8.4925	9.4966	11.3465	13.9628
	0.82	2724.48	1479.85	1078.56	2478.36	2616.13			0	0	0	0	0				8.5386	14.0428	18.0449	24.3888	30.9503
	0.826	2499.3	2291.6	1454.35	2449.44	2015.68			0	0	0	0	1				12.7388	18.9253	23.1439	30.257	38.1057
	0.831	1806.23	0	920.361	2282.26	2147.22			0	0	1	2	2				4.3568	6.7114	8.8207	10.93	12.7614
	0.837	2412.69	1890.26	1395.58	2331.07	1488.96			0	0	1	1	1				10.3384	15.1625	19.0955	25.4432	31.2997
	0.842	2481.54	1260.37	1517.61	2748.64	2105.35			0	0	1	2	2				1.85	6.1339	9.535	15.9513	18.3634
	0.848	2405.71	1806.87	1206.18	2685.93	2377.57		1 mM Ado	0	0	0	0	1				4.186	5.7774	8.7024	12.2612	13.6844
	0.853	1780.62	1620.57	1845.64	1767.41	2575.75			0	0	1	2	4				7.1392	7.1392	7.1392	10.3087	17.166
	0.859	3087.84	2318.41	2195.9	1161.66	0			0	0	0	1	2				16.8406	22.7596	28.5697	32.3602	35.7129
	0.864	1628.07	1836.39	1715.97	1228.03	2216.53			0	0	1	1	1				6.3291	10.5758	15.9526	19.0411	22.3581
	0.87	0	1760.39	1520.22	1444.42	3116.72			0	0	1	2	2				11.3994	17.854	22.6548	29.2182	35.7306
	0.875	1536.55	2323.2	2341.81	1155.77	4286.62			0	0	0	0	2				9.2906	10.9194	17.4828	21.8846	28.5889
	0.881	1795.47	2265.78	2104.93	1360.25	7009.88			0	0	1	1	2				9.8463	13.2976	16.7514	19.5831	30.0883
	0.886	1851.73	2760.33	2793.22	1376.19	8312.33			0	0	0	0	1				12.3748	18.4377	23.7678	26.2095	33.3693
	0.892	1679.67	2692.36	2528	1892.46	15832.2			0	0	0	0	1				1.7265	2.349	3.5367	9.2821	11.8313
	0.897	0	2672.69	2067.09	1937.69	23193.9			0	0	0	0	0				8.4291	10.9958	12.5401	14.1319	20.7555
	0.903	1531.39	2769.11	2675.37	2084.03	32435.8			0	0	0	0	0				2.4866	4.0761	6.0942	8.9008	14.2909
	0.908	0	3901.33	3444.76	3555.1	47784.5			0	0	1	1	2				3.4915	8.5852	13.306	19.2971	25.1071
	0.914	1697.84	4472.81	4297.18	5713.2	61094.7			0	0	0	1	2				8.0697	10.7463	12.6428	18.8306	25.3822
	0.919	0	4244.42	7167.9	10904.9	84086.8			0	0	0	1	2				11.8423	17.7354	22.0881	30.5004	36.5056
	0.925	4237.91	6306.89	9953.31	16464.2	87737.1			0	0	1	3	4				10.4692	16.3362	20.4799	29.4453	40.4409
	0.93	4161.65	7162.44	17947.7	25974.3	104882			0	0	0	0	1				6.8253	8.0805	8.0805	15.6883	16.7371
	0.936	3989.32	6273.54	27044.1	32589.2	127624			0	0	1	3	3				3.8434	7.8913	10.5731	12.8145	14.9471
	0.941	6185.53	6675.43	31128.2	39374.9	135391			0	0	0	0	1				9.1822	15.3812	20.3708	27.9133	36.8694
	0.947	6727.78	5271.82	41721.1	56295.7	136931			0	0	0	0	0				19.6705	27.4243	35.7454	41.6669	52.5518
	0.952	5748.8	5686.6	55768.1	61049.9	146985			0	0	0	0	2				18.7255	28.0612	37.8359	45.8069	56.2913
	0.958	7694.35	5713.04	66607	75981.6	137131			0	0	0	0	1				12.5487	18.2162	21.4888	22.9433	24.5695
	0.963	7894.73	5859.52	80034.4	77587.8	134822			0	0	1	1	1				16.8829	23.6403	32.2113	40.5211	47.0851
	0.969	7037.02	4974.72	100012	94705.5	136285			0	0	1	1	1				11.6467	16.4632	24.3129	29.4697	42.1924
	0.974	7673.43	5142.64	93528.9	100363	133159			0	0	0	0	0				11.5286	17.9687	26.2917	35.9208	47.4817
	0.98	7499.2	5348.69	106387	125789	117926			0	0	0	2	2				17.9506	20.6351	26.4164	35.7738	45.3893
	0.985	7332.23	5157.18	106879	121457	109119			0	0	0	0	0				8.876	11.9722	15.3434	16.6291	17.6576
	0.991	7648.6	4770.87	108603	132762	119909			0	0	1	1	1				15.3732	22.6526	31.6239	40.6915	46.1761
	0.996	7311.84	4256.52	125012	125740	102414			0	0	1	1	1				18.5055	27.6739	37.1875	43.88	56.326
	1.002	6687.02	3624.19	118076	125845	99626.5			0	0	0	0	0				14.5153	22.1902	29.406	37.4029	45.7152
	1.007	7100.01	3411.03	114737	123224	85186.3			0	0	0	0	0				16.967	24.5019	33.1137	37.386	45.3911
	1.013	6209.69	3494.42	118462	120770	80998.2			0	0	0	0	0				21.6616	29.1215	37.7154	45.0992	55.542
	1.018	6708.49	3255.26	114649	128691	72184.1			0	0	0	0	1				22.4572	29.4081	36.6841	45.1692	53.2687
	1.024	6101.63	2742.03	120800	119269	62777.9			0	0	1	2	2			500 µM ATP + Fo5176 pSIX::GFP	7.1143	9.222	13.3057	18.5929	24.8773
	1.029	6873.34	1844.55	118951	128793	55853.3			0	0	0	1	1				9.5066	15.4792	21.6921	23.2607	28.6503
	1.035	5454.62	3538.85	98786.2	111847	54327.3			0	0	1	1	1				5.2286	10.6687	11.7144	12.8836	13.4682
	1.04	5699.53	2945.04	104504	104048	56519			0	0	1	1	1				6.4598	10.1198	15.5669	19.5696	20.8768
	1.046	4707.88	1777.4	90957.6	100856	47666.2			0	0	1	2	2				6.8279	10.3158	13.1315	14.8055	16.4795
	1.051	5666.06	2330.5	84622.4	100833	42013.8			0	0	0	2	2				9.5473	13.2675	15.2585	18.9742	25.7807
	1.057	4808.23	2489.88	82123.2	95843.3	43028.1			0	0	1	2	2				8.5389	10.6466	15.6754	17.3493	20.5831
	1.062	4782.79	1697.33	76241.9	82477.2	36344.4			0	0	0	0	0				2.6143	4.4629	7.7639	11.5071	16.0049
	1.068	4066.56	1899.8	65918.7	80859	35279.8			0	0	0	0	0				3.6867	14.8674	23.0195	24.0998	26.3537
	1.073	4376.04	1452.7	73843.5	78088.8	30190.7			0	0	0	0	0				3.7284	9.0917	11.5635	13.3976	19.2151
	1.079	3376.9	1341.15	73577.5	68502.5	30127.1			0	0	0	0	1				5.2733	8.0147	9.3276	10.0655	11.3784
	1.084	4085.78	1310.67	62458	69385.8	29419.7			0	0	0	1	2				8.1102	12.8656	16.4371	23.5982	30.5723
	1.09	2752.73	1381.09	60835.4	65584.5	27796.3			0	0	0	0	2				5.1735	6.6589	8.5156	9.4623	11.6665
	1.095	2514.33	2133.38	53563.6	54036.1	25505.8			0	0	0	2	3				3.1944	7.2328	7.7579	8.8935	8.8935
	1.101	3114.52	0	49743.6	54659.7	19466.1			0	0	0	1	4				6.9958	8.3087	9.6215	10.7958	12.3713
	1.106	2985.02	0	45084.2	45981.4	25373.7			0	0	0	0	1				6.197	9.5596	11.7877	20.4876	27.6349
	1.112	3236.91	0	40095.3	42206.3	22354.1			0	0	0	0	2				12.5258	15.0714	16.9679	18.3897	19.3181
	1.117	2003.74	0	40147.5	43584.9	22040.2			0	1	3	5	5				10.8717	13.3166	14.9062	16.6042	17.6095
	1.123	0	1552.15	35776.2	43170.5	18829.5			0	1	1	1	1				8.9527	13.4618	14.4962	16.0537	17.2103
	1.128	2718.96	0	36796.4	37740	16157.4			0	0	0	0	0				14.3645	21.9323	28.531	29.4101	29.4101
	1.134	1686.72	0	34679.7	33946.2	17175.9			0	1	1	1	1				7.014	11.3774	15.3428	19.7469	19.7469
	1.139	1528.09	1444.59	33216.6	33754.5	15066.6			0	1	1	1	2				11.8947	17.143	23.2168	28.9214	33.5888
	1.145	2121.13	0	29759	33810.1	14990.8			0	1	1	1	1				12.356	13.3613	14.9969	14.9969	16.8619
	1.15	1405.62	0	27850	26192.5	12678.2			0	0	0	0	2				10.6009	12.6842	15.9373	19.9177	19.9177
	1.156	1304.73	1276.45	26362.4	26685	13327.9			0	0	1	1	2				10.0342	11.7583	13.9662	16.598	16.598
	1.161	0	0	24066.9	22238	13660.3			0	0	0	0	2				9.1056	13.5899	14.5184	15.365	15.8822
	1.167	2034.72	0	22116.2	22256	12823.8			0	0	0	2	3				7.9302	12.6439	13.8508	15.8177	17.5728
	1.172	1668.23	0	23280.2	23192.8	11428.5			0	1	1	1	2				7.073	9.4929	11.2256	12.4808	14.8822
	1.178	0	555.059	22292.2	20029.1	10905.1		500 µM ATP + 1 mM Ado	0	0	1	1	1				7.0155	8.2707	9.246	11.3506	12.3993
	1.183	1205.77	353.277	18922.2	19407	12821.9			0	0	0	0	0				11.1467	13.6333	15.0233	15.713	21.144
	1.189	1091.23	0	20704.1	20354	8853.25			0	0	0	1	1				2.7941	4.6985	6.4985	8.9368	12.045
	1.194	953.97	743.07	19622.7	19395.6	8792.68			0	0	0	0	2				9.0254	10.2687	11.3727	13.5535	14.1752
	1.2	0	533.502	16720.3	17824	8805			0	0	0	2	3				10.2429	15.1271	21.5681	24.2717	27.1976
	1.205	1371.43	0	17394.6	15131.2	7924.45			0	0	0	1	2				12.1752	15.8786	17.7505	17.7505	17.7505
	1.211	1301.17	847.881	14655.8	14060.6	8903.27			0	0	0	2	3				8.84	10.1256	10.1256	10.1256	10.1256
	1.216	0	0	14640.3	12326.6	8458.09			0	0	0	1	2				9.4312	10.9305	12.5567	12.5567	12.5567
	1.222	1909.91	582.984	13080.4	13503.4	6450.67			0	0	1	1	1				14.4983	14.4983	14.4983	14.4983	14.4983
	1.227	1198.2	1040.43	13860.8	13837.3	5390.88			0	0	0	0	2				8.8398	9.097	9.097	9.097	9.097
	1.233	0	0	11707.6	12030.5	7016.12			0	0	1	2	2				8.3527	9.8954	9.8954	9.8954	9.8954
	1.238	826.67	382.651	13100	13363.6	5962.78			0	0	0	0	0				17.324	19.8953	20.6225	20.6225	20.6225
	1.244	540.707	0	12651.3	13675.6	6688.55			0	0	0	2	2				6.6776	3.8659	5.684	8.649	8.649
	1.249	0	582.376	11745	12022.6	5646.41			0	0	0	0	1				3.4973	5.2221	5.2221	7.2056	7.2056
	1.255	1646.81	1017.1	10769.1	10333	4818.53			0	0	0	0	0				6.7943	12.4853	16.8724	16.8724	16.8724
	1.26	0	964.983	8229.58	9423.54	4170.41			0	0	0	0	2				11.7172	16.2077	23.094	28.0653	31.6466
	1.266	1358.33	262.007	8647.44	8555.14	3745.89			0	0	1	1	2				3.2726	4.919	5.3456	7.7113	10.1959
	1.271	1416.74	0	8454.93	8785.72	4299.25			0	0	0	1	1				7.2545	8.0676	10.7528	12.8353	16.4716
	1.277	899.89	395.458	8099.35	9761.67	3815.59			0	0	0	0	0				12.6759	18.1709	22.9152	24.7467	25.8069
	1.282	816.452	399.929	7161.85	9132.47	3574.79			0	0	0	0	0			1 mM Ado	3.4504	8.852	17.1083	25.8532	34.6097
	1.288	1229.92	436.085	6791.97	8656.17	3710.54			0	0	1	1	1				9.0584	19.2178	30.3508	41.9112	52.7671
	1.293	919.732	918.244	7154.34	8227.01	3189.33			0	0	1	1	1				9.5734	17.1259	25.46	36.5021	47.1683
	1.299	0	680.965	6607.85	8164.13	3211.34			0	1	1	2	2				17.8939	27.5393	37.5398	50.0425	62.4782
	1.304	512.215	495.834	6006.5	4990.78	3859.33			0	0	1	2	2				7.6274	14.9148	22.1976	33.1335	45.1752
	1.31	0	709	5960.11	5545.88	2410.57			0	0	0	1	1				18.0799	26.9075	39.9101	50.0216	63.2153
	1.315	527.993	428.063	5807.92	5461.12	2188.77			0	0	0	0	0				8.3991	12.2784	20.278	25.1631	35.3147
	1.321	892.308	874.283	5822.56	5684.78	3433.22			0	0	0	0	0				5.5829	12.0484	19.0225	23.2878	31.0748
	1.326	0	340.754	4268.21	4362.31	2912.86			0	0	0	0	0				3.372	6.4754	8.2103	17.2279	28.4884
	1.332	0	0	2755.62	4597.26	2621.35			0	0	0	0	0				9.8375	15.9288	24.1145	34.386	44.3281
	1.337	781.162	462.993	3931.52	4077.22	2884.62			0	0	3	3	3				19.2327	29.1821	41.0577	53.9263	66.4136
	1.343	541.273	0	0	0	1996.66			0	0	1	1	1				15.9476	23.4654	33.6288	43.5418	55.5237
	1.348	682.504	781.425	5232.16	5917.67	3100.5			0	0	0	0	0				12.0048	22.2502	32.0268	44.3253	56.3584
	1.354	0	760.943	3416.91	3972.74	2719.12			0	1	1	1	1				14.9614	24.04	33.1877	44.2553	56.6176
	1.359	522.224	0	4381.34	2837.29	1900.33			0	0	1	1	2				9.0322	16.3273	24.1893	33.9192	45.3492
	1.365	0	0	3469.52	3958.35	2544.05			0	0	0	0	1				21.5987	28.6797	45.2649	54.7062	65.8818
	1.37	454.772	0	3412.55	3419.06	2376.27			0	0	1	1	2				21.4785	31.6237	42.0305	55.1048	66.68
	1.376	304.824	728.516	3692.21	2454.77	3028.93			0	1	2	3	3				19.009	33.2567	45.2918	59.3668	71.8628
	1.381	0	0	3031.79	3547.47	2713.62			0	1	2	3	3				19.6107	33.7253	44.6026	58.4067	72.5496
	1.387	745.769	500.18	3153.31	3910.81	0			0	0	2	2	2				24.082	35.4883	48.1796	62.5089	72.2853
	1.392	1104.09	0	3241.25	2998.2	2977.62			0	0	0	0	0				23.7995	35.0286	42.1264	59.4096	74.818
	1.398	497.667	0	3236.61	3685.64	2745.59			0	1	2	2	2				20.1719	30.0038	41.3328	54.1727	67.6431
	1.403	788.977	324.681	4671.78	2888.38	2963.82			0	0	0	0	1				21.804	32.6983	43.5581	57.9464	71.1252
	1.409	547.569	486.469	3480.24	3033.66	0			0	0	1	1	1				25.6427	36.3682	48.6615	59.2157	71.4141
	1.414	742.9	0	2229.56	3504.35	0			0	0	0	1	3				23.3466	34.4342	45.7026	59.4062	72.2069
	1.42	421.661	0	2527.17	2867.88	3378.7			0	1	3	3	4				22.5643	35.7805	43.2213	55.5995	73.6208
	1.425	421.004	660.546	3289.8	2620.97	2740.5			0	1	1	1	1				22.4485	33.1716	44.1485	55.9597	68.8467
	1.431	922.115	0	2393.1	2388.56	2557.64			0	0	1	1	3				21.52	31.4916	41.2695	53.3822	67.6196
	1.436	706.745	0	4299.32	2783.9	2234.16			0	1	1	1	2				26.0818	35.9591	46.4018	59.1064	73.288
	1.442	846.309	0	3502.53	3565.39	0			0	1	1	1	2				16.9494	27.0105	36.8381	48.8339	63.0345
	1.447	0	0	2112.4	2928.22	2619.32			0	2	2	2	4				15.0166	23.7625	33.3336	43.1473	54.9881
	1.453	0	0	0	1986.29	2633.35			0	1	1	1	3				17.0203	26.8705	37.1101	48.5979	58.3825
	1.458	254.986	473.823	3094.98	2141.85	3249.31			0	0	1	2	2				17.5244	26.6147	35.8172	46.7183	56.9933
	1.464	673.126	0	2427.12	2269.33	2597.36			0	0	0	0	3				19.3015	29.8631	40.3787	48.8791	60.6467
	1.469	0	0	0	2386.01	2136.44			0	1	2	2	3				20.0254	30.1185	37.7525	48.1781	64.5948
	1.475	348.502	0	2035.9	1694.39	2824.55			0	2	3	3	3				19.5211	28.9819	41.0795	51.551	60.3113
	1.48	471.149	0	1927.17	1774.77	3007.67			0	1	2	3	4				27.264	38.6946	50.782	65.1151	76.5319
	1.486	712.391	796.387	1731.88	2608.69	1805.83			0	0	0	1	1				29.4294	42.2134	55.6325	69.1712	84.9296
	1.491	579.562	213.471	1543.48	2527.06	2251.78											30.5427	43.682	58.5289	66.2103	72.4027
	1.497	0	0	1658.72	2170.66	0											31.063	42.3702	56.6999	72.2305	77.3794
	1.502	0	427.008	2216.65	2149.12	1996.16											20.4133	32.1413	45.5817	58.2669	77.2341
	1.508	0	0	2085.01	1659.36	0											32.1781	44.9494	58.2866	68.8187	76.8902
	1.513	440.137	336.064	0	1403.34	2160.66											28.2524	40.8953	53.3068	68.588	72.7737
	1.519	0	324.13	1441.09	1684.14	2596.27											30.5475	42.0162	54.8509	68.6831	79.7477
	1.524	431.635	0	1778.84	0	2610.97											32.5895	44.956	59.2478	74.8315	80.53
	1.53	835.634	0	1531.38	2465.2	2185.76											31.1331	36.6749	51.637	72.1395	81.5234
	1.535	0	0	1544.33	1639.21	2249.44											23.6923	34.6614	47.4174	60.6316	78.7737
	1.541	0	0	2098.11	1523.25	2201.12											26.5305	37.8725	50.4803	61.8071	77.3358
	1.546	0	1026.68	2318.15	1734.13	1852.66										1 mM Ado + Fo5176 pSIX::GFP	23.849	31.8115	34.9578	35.7756	35.7756
	1.552	651.619	0	2064.35	1910.02	2194.87											26.4936	36.5862	38.9138	40.4218	42.0575
	1.557	584.053	453.229	0	2131.11	0											21.8626	30.9089	34.7882	38.4911	42.0088
	1.563	621.025	750.242	2018.47	1618.87	2737.56											21.9811	31.795	35.3586	36.9943	39.2723
	1.568	433.074	558.062	2281.99	2006.33	2839.08											23.2803	33.1221	36.6397	37.706	39.5348
	1.574	0	915.844	0	1966.26	0											28.0694	35.5643	41.3123	42.705	42.705
	1.579	720.881	797.917	1491.47	2930.28	3233.38											25.7834	34.7916	35.8579	35.8579	35.8579
	1.585	1104.9	647.378	2337.44	1769.01	2260.7											27.8347	36.1167	39.0455	40.6186	42.1918
	1.59	0	0	2116.38	2043.55	2394.66											18.8497	28.4271	32.425	34.0606	34.3192
	1.596	859.352	0	2236.92	2966.11	0											20.6577	34.7804	40.6915	41.0572	41.0572
	1.601	1264.11	1024.87	1748.37	2453.02	0											21.35	27.84	30.5401	30.5401	30.5401
	1.607	0	0	2648.43	2408.22	0											26.2319	34.6593	39.5731	42.0266	42.1203
	1.612	0	1472.31	2634.78	3111.01	0											25.9859	34.1789	40.1328	42.5172	43.0955
	1.618	2421.92	0	2739.86	3401.94	3540.42											23.6888	32.4912	38.4352	40.264	40.264
	1.623	0	0	3141.84	3333.96	3424.55											26.2371	31.9411	43.4025	45.8423	47.7072
	1.629	2876.19	0	2316.13	5732.26	0											23.9848	33.8602	36.7167	40.596	40.596
	1.634	0	4906.34	4247.64	4770.29	0											25.47	33.8977	40.1368	41.7928	43.3008
	1.64	4730.3	4996.57	4173.98	0	3285.46											25.0941	34.0273	38.8125	40.1312	41.1975
	1.645	0	5799.26	3638.82	6734.83	3344.3											25.7461	34.2318	38.4971	41.2825	42.9385
	1.651	6751.57	7743.5	4330.29	8848.99	0											22.3577	24.8294	25.6071	25.6071	25.6071
	1.656	6536.11	6920.55	3166.12	8098.43	4280.67											23.2809	27.0095	27.946	27.946	27.946
	1.662	5846.02	6808.28	3332.92	8508.45	3386.51											21.5399	22.5834	22.5834	22.5834	22.5834
	1.667	7068.23	6380.97	2823.25	8696.15	4408.67											24.1067	27.7095	29.3502	29.3502	29.3502
	1.673	7272.63	8044.23	3473.51	9437.68	0											20.1971	20.443	20.443	20.443	20.443
	1.678	8309.15	9040.85	2675.05	8317.7	0											18.03	23.2534	23.2534	23.2534	23.2534
	1.684	10053.4	0	0	8989.27	0											25.1014	28.3091	30.0996	31.2131	31.2131
	1.689	8361.78	8211.61	4019.25	8701.36	0											24.0199	28.8804	30.9159	30.9159	30.9159
	1.695	0	7327.9	0	7549.13	0											23.3313	28.1162	30.7248	32.4638	32.4638
	1.7	6900.59	5324.89	0	6654.18	0											20.436	23.8127	25.2175	26.8208	26.8208
	1.706	6268.47	4696.27	2985.26	5032.7	0											20.6654	26.2605	27.5266	29.3001	29.3001
	1.711	4086.16	4281.73	0	6293.84	0											20.7022	25.9916	27.9745	29.2042	29.2042
	1.717	4825.33	3760.35	0	5007.88	0											14.2064	15.4361	17.5164	21.0433	21.0433
	1.722	5430.01	3292.31	0	3487.48	0											19.8798	28.0702	30.3376	30.3376	30.3376
	1.728	4103.19	2887.88	0	3405.38	0											18.8526	25.362	30.4717	33.4738	33.8626
	1.733	3055.26	3956.57	2845.56	3007.25	0											16.391	19.8166	25.4984	27.838	28.0119
	1.739	3484.65	3447.38	1344.02	2544.6	0											19.2461	20.2895	22.6693	24.6486	26.5303
	1.744	3025.62	0	3000.44	2362.34	0											20.0649	21.6682	31.3932	33.5089	36.3161
	1.75	2673.27	2115.58	3629.28	2768.83	0											18.7149	23.0856	31.6901	33.5057	35.424
	1.755	1655.67	2397.05	2065.03	2338.11	0											18.1327	24.6535	29.2975	30.6888	30.6888
	1.761	0	1926.83	2336.51	2007.41	0											11.1306	11.1306	11.1306	11.1306	11.1306
	1.766	2243.6	0	0	1891.67	0											21.906	24.9156	27.0359	27.0359	27.0359
	1.772	1275.97	2214.7	2965.18	1772.21	0											23.483	28.1397	29.4508	29.4508	29.4508
	1.777	1842.4	1605.52	2514.46	1995	0											12.6116	16.7373	18.3635	18.3635	18.3635
	1.783	0	2348.61	2517.54	2297.35	0											22.8843	26.1772	27.8236	27.8236	27.8236
	1.788	1781.72	1865.39	2087.22	1219.07	0											21.6035	25.2458	26.0172	26.0172	26.0172
	1.794	1943.41	0	0	1541.33	0											22.7121	23.862	23.862	23.862	23.862
	1.799	1561.65	0	1717.01	1321.86	0											25.0198	26.8379	28.3372	28.3372	28.3372
	1.805	1531.15	0	0	1199.76	0											26.3171	29.7476	30.6747	30.6747	30.6747
	1.81	1700.03	1636.06	0	1527.73	0											19.4651	24.6381	26.438	26.438	26.438
	1.816	0	0	1203.88	0	0											13.2165	19.6822	21.2463	24.1553	25.4664
	1.821	1351.26	2105.75	1054.86	1832.86	0											24.0628	27.0614	28.5607	29.8718	31.5182
	1.827	0	0	0	1335.21	0											22.8997	25.471	26.4995	26.4995	26.4995
	1.832	0	0	0	634.838	0											22.9975	26.3402	27.1116	27.1116	27.1116
	1.838	1236.39	2120.85	1094.62	840.524	0											20.7653	21.3402	21.3402	21.3402	21.3402
	1.843	0	1143.9	1109.5	1372.74	0											25.1936	26.9935	26.9935	26.9935	26.9935
	1.849	1471.57	0	892.288	0	0											15.2178	15.2178	15.2178	15.2178	15.2178
	1.854	1744.62	1811.47	1197.37	1184.97	0											20.1124	21.9123	21.9123	21.9123	21.9123
	1.86	1401.75	1086.16	0	1261.67	0										500 µM ATP + 1 mM Ado	3.372	5.2007	8.0922	15.498	21.2712
	1.865	0	0	1106.2	1099.72	0											8.6708	14.2972	20.3693	27.7938	29.6042
	1.871	0	1707.86	0	860.509	0											13.2215	15.6614	17.4717	17.4717	17.4717
	1.876	0	1384.1	0	880.869	0											7.642	14.6364	17.5279	20.3133	24.6176
	1.882	0	0	992.38	0	0											17.079	21.7414	25.9361	30.8499	34.7378
	1.887	0	0	1261	1344.33	0											15.4653	20.1204	25.576	32.3969	39.8449
	1.893	0	0	0	912.943	0											2.4535	3.9165	6.7028	12.3739	18.0987
	1.898	0	0	0	1193.19	0											2.8566	5.9815	8.0666	10.1355	10.1355
	1.904	0	0	0	2073.36	0											1.463	2.2808	3.9165	10.3405	17.6726
	1.909	1007.98	0	0	1099.05	0											5.7925	7.6373	9.7224	12.5672	15.2046
	1.915	0	0	0	575.324	0											9.4533	11.4272	13.5555	18.152	18.4106
	1.92	0	0	0	1306.72	0											5.6741	7.7591	14.8163	19.8385	25.5137
	1.926	0	0	0	777.133	0											11.113	17.3014	20.977	26.7201	31.8046
	1.931	0	0	0	955.028	0											7.2376	10.5906	12.8515	12.8515	12.8515
	1.937	0	0	0	1099.4	0											18.0536	25.047	29.3568	33.1856	36.2578
	1.942	0	0	0	1235.72	0											14.4443	20.6983	23.6652	31.2125	32.0993
	1.948	0	0	0	649.727	1032.27											10.0512	11.1511	12.7065	12.7065	12.7065
	1.953	0	0	0	496.538	0											15.0219	18.3034	19.5695	20.7361	20.7361
	1.959	1347.85	0	0	1119.05	0											18.304	25.3475	27.8191	28.0651	28.0651
	1.964	0	0	0	0	0											15.7857	22.7118	25.9467	33.3258	36.2044
	1.97	0	0	0	0	0											24.095	31.0597	38.2371	46.9772	56.1984
	1.975	0	0	0	560.763	0											22.7933	29.2053	30.8086	34.7743	43.9072
	1.981	455.211	0	0	1098.94	0											10.1318	13.8658	15.7787	15.7787	15.7787
	1.986	0	0	0	976.897	0											6.7956	10.0468	11.9199	14.3798	15.5971
	1.992	0	0	0	585.433	0											16.9109	22.2841	28.6734	32.8103	38.2136
	1.997	921.006	0	0	0	1400.72											12.5564	16.5222	17.2178	17.2178	17.2178
	2.003	0	0	0	0	1301.28											12.8972	14.8415	14.8415	14.8415	14.8415
	2.008	0	1083	0	1043.37	0											11.0992	15.0804	23.6513	31.4175	37.7241
	2.014	0	0	0	0	0											5.7099	8.5621	11.2224	18.9706	18.9706
	2.019	961.666	0	0	0	0											11.0112	16.7396	21.9635	27.5343	33.7972
	2.025	557.368	0	0	979.067	0											15.0455	17.1658	21.4596	23.1844	24.9093
	2.03	0	0	0	591.209	0											20.9757	28.9504	36.8212	44.7991	51.5721
	2.036	0	1245.02	0	1140.07	0											17.1909	19.3878	21.9719	24.286	24.286
	2.041	817.336	1049.72	0	841.926	0											16.6027	20.1232	21.848	21.848	21.848
	2.047	863.31	1334.84	0	357.44	0											11.9834	17.5177	21.2307	21.2307	21.2307
	2.052	0	1313.72	0	593.799	0											13.2473	19.1867	26.8114	34.5176	44.0734
	2.058	630.675	1707.4	0	0	0											24.3959	32.6002	40.7853	49.451	55.4915
	2.063	0	1097.37	0	746.35	0											17.1324	27.2486	38.3603	48.6036	57.5477
	2.069	0	840.949	0	625.255	0											20.0024	26.7369	41.495	51.3085	61.5343
	2.074	0	0	0	0	0											7.8919	15.5822	23.5701	32.4958	46.3508
	2.08	0	0	0	954.444	0											22.1664	31.359	40.3458	50.3644	60.0011
	2.085	0	0	0	1060.79	0											21.714	29.8624	40.1282	49.6326	61.4645
	2.091	0	0	0	926.781	0											19.4194	27.2488	34.8921	42.7646	51.8575
	2.096	1052.73	0	0	0	0										500 µM ATP + 1 mM Ado + Fo5176 pSIX::GFP	4.4042	8.5823	14.2712	16.1361	17.7921
	2.102	0	0	0	670.1	0											10.8857	14.2478	18.691	20.9007	22.1938
	2.107	0	1455.6	0	1307.68	0											7.6514	13.189	18.4195	22.7293	24.4642
	2.113	462.871	0	0	770.294	0											4.6873	7.3248	9.1897	10.5084	12.3912
	2.118	0	0	0	454.875	0											10.609	14.9813	21.7226	25.4525	28.344
	2.124	0	0	0	0	0											7.8665	10.6157	12.1888	19.1526	19.9704
	2.129	517.362	1147.08	0	603.694	2120.78											8.6382	13.407	20.251	25.6532	26.9463
	2.135	0	1269.78	0	544.4	0											1.8828	6.6053	12.8449	14.138	14.6552
	2.14	0	696.665	0	681.923	0											6.7778	13.0729	19.8418	25.279	30.6656
	2.146	0	0	0	749.591	0											7.8821	13.8012	20.2218	25.9349	27.7637
	2.151	0	0	0	1236.41	0											10.9973	13.207	14.7801	19.0784	19.337
	2.157	0	824.297	0	330.722	0											11.7062	12.9993	16.8786	21.2209	23.0313
	2.162	0	633.241	0	0	0											4.6697	8.5597	11.9317	14.9478	16.5209
	2.168	953.043	881.042	0	792.888	0											7.2414	8.8974	10.759	10.3448	11.4111
	2.173	491	0	0	1344.25	0											17.0586	21.1417	21.1417	21.1417	21.1417
	2.179	820.139	0	0	377.31	0											9.705	9.705	9.705	9.705	9.705
	2.184	1178.38	0	0	1026.16	0											9.7436	11.1457	12.8934	12.8934	12.8934
	2.19	0	0	0	0	0											14.1799	16.7476	17.0954	17.0954	18.4604
	2.195	311.117	0	0	694.365	0											5.2325	5.9495	5.9495	11.2829	15.9037
	2.201	534.372	0	0	968.465	0											2.1623	3.3534	7.0054	10.8266	21.7613
	2.206	0	0	0	899.811	0											9.2604	11.5279	11.5279	11.5279	11.5279
	2.212	0	726	0	0	0											12.1647	15.7456	16.2375	16.2375	16.2375
	2.217	837.002	0	0	686.759	0											6.7699	8.172	9.186	9.186	9.186
	2.223	0	0	0	0	2220.69											7.763	9.0171	9.0171	9.0171	9.0171
	2.228	0	0	0	240.043	3616.14											12.2992	19.7424	25.0087	33.1033	37.5318
	2.234	0	0	0	674.491	3110.45											11.5678	17.9822	24.0113	30.4479	34.9282
	2.239	0	0	0	820.129	2814.53											7.9529	18.7123	18.7123	18.7123	18.7123
	2.245	0	0	0	649.531	2589.93											11.949	18.7095	22.658	23.9241	23.9241
	2.25	0	0	0	0	0											18.1975	18.1975	18.1975	18.1975	20.2705
	2.256	0	0	0	0	2039.59											19.9545	23.3604	24.1735	24.1735	24.1735
	2.261	0	0	955.489	0	0											11.802	15.2518	19.9085	24.0625	26.1355
	2.267	1063.21	0	0	241.261	0											7.7018	9.2445	9.2445	9.2445	9.2445
	2.272	0	1040.95	0	0	0											16.1654	16.1654	16.1654	16.1654	16.1654
	2.278	590.573	944.298	0	630.008	1089.74											17.7098	17.7098	17.7098	17.7098	17.7098
	2.283	1348.94	0	0	467.375	0											16.2405	17.6951	17.6951	17.6951	17.6951
	2.289	0	0	1193.11	0	0											17.6961	21.6878	22.4151	22.4151	22.4151
	2.294	734.261	0	0	0	0											14.0994	21.2506	26.1869	27.9868	28.7582
	2.3	0	0	0	465.861	0											17.6799	19.3263	19.3263	19.3263	19.3263
	2.305	0	0	0	569.344	0											12.0531	12.0531	12.0531	12.0531	12.0531
	2.311	0	1225.15	0	468.893	0											18.0364	19.8906	19.8906	19.8906	19.8906
	2.316	754.493	0	0	634.261	0											11.2243	14.4048	16.0512	16.0512	16.0512
	2.322	1179	768.714	0	454.823	0											10.0534	11.6174	18.8901	18.8901	18.8901
	2.327	0	0	0	0	0											16.178	17.9028	17.9028	17.9028	17.9028
	2.333	0	0	0	617.12	0
	2.338	888.842	0	0	609.03	0
	2.344	0	0	0	649.208	0
	2.349	0	609.232	0	0	0
	2.355	0	495.14	0	0	0
	2.36	0	0	0	449.863	0
	2.366	0	0	0	0	0
	2.371	0	1279.24	0	0	0
	2.377	0	618.396	0	0	0
	2.382	0	719.001	0	0	0
	2.388	0	539.139	0	0	1930.03
	2.393	528.184	889.314	0	0	0
	2.399	0	360.42	0	0	0
	2.404	627.111	722.474	0	339.521	0
	2.41	0	418.139	0	0	0
	2.415	0	0	0	0	0
	2.421	0	993.381	0	390.844	0
	2.426	0	0	0	961.047	0
	2.432	0	0	0	1137.11	0
	2.437	1046.14	0	0	0	0
	2.443	0	0	0	0	0
	2.448	0	0	0	973.971	0
	2.454	0	0	0	280.174	0
	2.459	0	0	0	585.005	0
	2.465	0	826.912	0	0	0
	2.47	0	0	0	383.779	0
	2.476	0	0	0	550.997	0
	2.481	0	0	0	658.225	0
	2.487	0	0	963.21	0	1065.08
	2.492	0	0	820.94	0	0
	2.498	0	841.382	0	0	0
	2.503	380.025	0	625.688	273.033	0
	2.509	0	438.752	493.735	538.371	0
	2.514	0	0	0	605.518	0
	2.52	0	0	0	311.472	0
	2.525	0	0	0	0	0
	2.531	0	0	0	0	0
	2.536	0	0	405.823	335.215	0
	2.542	601.516	0	0	0	0
	2.547	0	0	627.894	0	0
	2.553	0	0	472.002	719.328	0
	2.558	0	0	934.92	0	0
	2.564	0	0	835.414	497.88	0
	2.569	0	0	0	0	0
	2.575	0	729.294	808.382	0	0
	2.58	0	0	0	512.25	0
	2.586	0	771.154	773.165	0	0
	2.591	0	0	261.878	0	0
	2.597	0	0	0	0	0
	2.602	0	0	615.316	0	0
	2.608	0	0	0	482.017	0
	2.613	0	833.454	0	718.653	0
	2.619	0	0	0	606.98	0
	2.624	0	0	0	0	0
	2.63	0	0	0	0	0
	2.635	0	0	0	770.758	0
	2.641	0	0	0	367.144	0
	2.646	0	0	0	593.778	0
	2.652	0	0	467.015	0	0
	2.657	0	0	0	0	0
	2.663	0	0	0	0	0
	2.668	0	0	0	0	0
	2.674	0	0	0	442.792	0
	2.679	0	0	0	415.769	0
	2.685	0	0	0	615.12	0
	2.69	0	0	0	0	0
	2.696	0	0	0	0	0
	2.701	0	0	0	0	0
	2.707	0	0	0	451.084	0
	2.712	0	0	0	0	0
	2.718	0	0	0	0	0
	2.723	0	485.613	0	0	0
	2.729	0	0	0	0	0
	2.734	0	0	546.815	0	0
	2.74	0	0	0	0	0
	2.745	0	0	0	0	0
	2.751	529.37	0	0	707.371	0
	2.756	0	0	0	375.959	0
	2.762	0	678.469	0	0	0
	2.767	486.063	0	0	0	0
	2.773	0	0	0	311.014	0
	2.778	438.521	0	0	524.348	0
	2.784	0	0	0	0	0
	2.789	0	0	0	0	0
	2.795	0	0	0	578.348	0
	2.8	0	0	0	0	0
	2.806	0	456.79	0	394.001	0
	2.811	0	0	0	0	0
	2.817	457.627	0	0	0	0
	2.822	0	620.891	0	978.925	0
	2.828	0	0	0	0	0
	2.833	0	0	452.119	572.235	0
	2.839	0	0	0	0	0
	2.844	397.205	0	0	347.361	0
	2.85	0	407.255	511.92	0	0
	2.855	0	0	835.354	675.483	0
	2.861	705.15	916.427	465.141	274.421	0
	2.866	0	0	0	430.119	0
	2.872	0	0	0	0	0
	2.877	275.094	0	0	697.954	0
	2.883	0	359.925	0	0	973.051
	2.888	366.156	0	0	475.146	0
	2.894	0	505.578	0	0	0
	2.899	0	0	0	0	0
	2.905	0	0	0	0	0
	2.91	988.555	0	529.069	0	0
	2.916	0	0	0	0	0
	2.921	0	0	0	577.417	0
	2.927	301.417	665.916	261.644	0	0
	2.932	0	0	0	478.767	0
	2.938	0	0	0	0	0
	2.943	0	0	507.69	391.34	0
	2.949	0	0	0	480.413	0
	2.954	480.364	0	620.356	0	0
	2.96	0	454.284	0	0	0
	2.965	583.012	615.575	523.236	632.067	0
	2.971	583.579	0	0	0	528.167
	2.976	0	0	641.713	686.681	0
	2.982	0	0	821.341	0	0
	2.987	0	0	429.102	0	0
	2.993	0	663.766	0	774.01	0
	2.998	0	788.309	0	0	0
	3.004	0	0	0	0	0
	3.009	0	0	0	0	0
	3.015	0	0	0	0	0
	3.02	0	0	0	0	0
	3.026	0	0	0	0	0
	3.031	0	0	0	0	0
	3.037	0	0	0	0	0
	3.042	0	0	0	0	0
	3.048	0	0	0	0	0
	3.053	0	0	0	0	0
	3.059	0	0	707.148	776.356	0
	3.064	0	0	678.612	0	412.803
	3.07	0	481.453	0	343.081	0
	3.075	0	0	0	0	0
	3.081	782.105	0	528.2	576.521	0
	3.086	522.037	0	566.184	0	0
	3.092	0	731.002	571.419	0	0
	3.097	478.019	0	0	0	0
	3.103	0	0	0	0	730.333
	3.108	0	0	0	0	0
	3.114	681.237	0	0	0	0
	3.119	0	0	0	0	631.379
	3.125	0	0	0	343.855	0
	3.13	0	0	0	0	0
	3.136	0	916.001	535.059	0	0
	3.141	0	0	0	0	526.2
	3.147	356.313	0	0	0	686.805
	3.152	0	635.056	0	0	0
	3.158	0	0	0	0	0
	3.163	0	0	0	616.074	0
	3.169	0	0	0	0	0
	3.174	565.19	0	316.148	0	0
	3.18	425.998	455.348	0	0	830.864
	3.185	396.567	0	0	0	0
	3.191	0	0	0	417.348	0
	3.196	0	0	421.044	0	0
	3.202	0	785.004	0	0	466.777
	3.207	0	0	421.841	0	0
	3.213	0	0	369.477	729.495	0
	3.218	370.571	402.198	584.218	0	0
	3.224	0	525.814	0	0	0
	3.229	0	0	311.872	0	642.308
	3.235	0	339.125	0	0	0
	3.24	283.236	537.019	320.416	307	429.736
	3.246	0	432.008	537.815	0	0
	3.251	0	0	0	0	0
	3.257	0	0	550.713	539.893	417.858
	3.262	690.03	0	298.496	243.135	0
	3.268	0	0	486.043	0	292.59
	3.273	834.642	0	0	0	0
	3.279	0	732.226	627.92	0	588.277
	3.284	0	0	0	309.881	0
	3.29	0	0	0	319.367	0
	3.295	0	593.036	664.892	701.27	0
	3.301	472.417	0	609.298	0	0
	3.306	0	0	0	0	0
	3.312	0	0	0	0	692.041
	3.317	0	0	0	0	0
	3.323	0	0	0	0	0
	3.328	0	0	0	0	0
	3.334	0	0	0	0	0
	3.339	0	0	0	0	0
	3.345	0	0	0	0	0
	3.35	0	0	0	0	0
	3.356	0	0	0	0	0
	3.361	0	0	0	0	0
	3.367	0	0	765.72	427.583	0
	3.372	0	0	0	0	0
	3.378	0	0	0	0	0
	3.383	656.172	0	0	0	0
	3.389	0	0	0	0	553.98
	3.394	0	0	0	0	0
	3.4	0	0	0	0	0
	3.405	0	0	0	539.308	428.109
	3.411	0	0	0	0	0
	3.416	0	0	0	0	0
	3.422	0	0	0	0	0
	3.427	0	0	0	0	0
	3.433	432.243	0	0	0	0
	3.438	0	0	0	376.962	0
	3.444	0	0	0	0	311.907
	3.449	0	0	323.215	0	0
	3.455	0	429.406	0	0	0
	3.46	0	0	0	0	0
	3.466	0	427.592	0	0	0
	3.471	0	0	0	0	0
	3.477	0	508.431	0	0	0
	3.482	0	0	0	0	0
	3.488	272.307	0	464.208	0	0
	3.493	0	0	0	0	0
	3.499	0	0	335.005	0	0
	3.504	0	0	0	0	0
	3.51	0	0	0	0	0
	3.515	269.894	375.018	279.447	0	256.505
	3.521	348.8	0	0	0	0
	3.526	0	0	0	547.131	493.327
	3.532	267.076	411.837	0	0	404.563
	3.537	283.918	0	0	0	0
	3.543	0	0	0	357.339	0
	3.548	0	0	0	0	0
	3.554	0	386.94	0	0	0
	3.559	0	0	0	0	237.754
	3.565	249.116	0	397.43	298.247	0
	3.57	0	216.109	262.103	0	0
	3.576	0	0	313.685	0	225.084
	3.581	409.64	0	490.517	221.083	0
	3.587	0	0	0	0	0
	3.592	0	0	0	409.892	0
	3.598	0	393.273	0	0	0
	3.603	0	0	0	0	0
	3.609	217.889	305.475	0	247.976	0
	3.614	432.467	0	265.44	0	305.009
	3.62	305.572	0	0	587.91	0
	3.625	296.009	0	0	0	647.682
	3.631	378.24	0	464.085	301.805	0
	3.636	0	0	0	0	0
	3.642	0	0	219.195	258.973	0
	3.647	431.159	0	0	0	0
	3.653	695.15	225.123	226.43	0	277.719
	3.658	490.422	0	0	695.122	0
	3.664	0	0	395.586	245.083	0
	3.669	0	0	0	0	0
	3.675	0	332.32	0	454.071	462.062
	3.68	0	360.81	0	0	0
	3.686	0	0	0	0	212.284
	3.691	621.431	377.39	449.067	0	0
	3.697	396.645	441.353	0	222.406	446.907
	3.702	0	0	376.893	0	0
	3.708	0	0	513.08	0	0
	3.713	0	0	0	0	428.089
	3.719	292.397	364.763	0	430.132	0
	3.724	359.008	0	346.174	266.805	0
	3.73	0	203.657	0	0	0
	3.735	0	0	231.001	0	337.385
	3.741	0	0	0	0	499.535
	3.746	0	310.013	614.712	0	0
	3.752	0	0	0	0	0
	3.757	380.233	0	0	0	0
	3.763	0	0	0	0	0
	3.768	0	0	0	0	0
	3.774	0	0	0	0	314.972
	3.779	0	0	0	0	316.368
	3.785	310.401	0	0	0	0
	3.79	0	0	0	0	228.053
	3.796	0	0	0	0	281.078
	3.801	0	0	359.889	583.503	0
	3.807	368.48	0	0	0	0
	3.812	0	0	0	388.342	0
	3.818	0	0	0	329.368	0
	3.823	0	0	0	0	274.43
	3.829	242.698	0	280.925	421.354	340.694
	3.834	0	0	0	496.25	0
	3.84	0	0	282.671	255.542	424.223
	3.845	0	327.551	0	0	216.637
	3.851	0	218.452	0	0	0
	3.856	303.506	0	0	0	0
	3.862	0	0	0	268.527	0
	3.867	0	0	0	0	0
	3.873	0	0	0	0	0
	3.878	269.703	0	0	0	0
	3.884	0	0	0	0	0
	3.889	0	308.971	0	0	0
	3.895	0	212.231	0	0	0
	3.9	378.275	0	0	0	0
	3.906	0	0	0	0	357.445
	3.911	0	0	495.959	239.149	0
	3.917	0	0	409.25	411.178	240.012
	3.922	257.101	0	377.468	278.022	237.667
	3.928	0	0	307.682	0	0
	3.933	0	0	0	0	441.298
	3.939	0	302.561	0	234.891	0
	3.944	0	0	0	0	413.299
	3.95	0	0	253.17	303.647	235.5
	3.955	0	0	0	0	294.137
	3.961	508.239	0	316.113	0	388.066
	3.966	0	338.899	0	0	0
	3.972	0	334.964	0	0	330.125
	3.977	0	0	0	0	0
	3.983	0	0	0	221.082	0
	3.988	340.539	0	380.413	217.249	0
	3.994	336.681	264.6	0	0	0
	3.999	427.305	479.456	0	310.233	479.474
	4.005	415.278	0	0	0	305.392
