# Supplementary material for: Soil-borne fungi alter the apoplastic purinergic signaling in plants by deregulating the homeostasis of extracellular ATP and its metabolite adenosine
Source: eLife. 2023 Nov 23;12:e92913. doi: 10.7554/eLife.92913 (PMC10746138; doi:10.7554/eLife.92913)
Supplement: Figure 2—figure supplement 1—source data 1. [file elife-92913-fig2-figsupp1-data1.xlsx]

## Sheet: Sheet1
Figure 2-Suppl 1-source data 1
	Ado content [pM] in media from 10 days-old hydroponically-grown WT
	Fo5176	0.011004	0.021109	0.006898
	WT	0.0438942	0.0620537	0.109894
	WT + Fo5176	0.106478	0.059981	0.087258
	dorn1	0.058179	0.207143	0.067885	0.137272
	dorn1 + Fo5176	0.283143	0.141558	0.076482	0.095163
	ent3	0.178498	0.166568	0.076183	0.05751
	ent3 + Fo5176	0.298608	0.173139	0.099411	0.213732
	ent3nsh3	0.08184	0.115118	0.105843	0.118234
	ent3nsh3 + Fo5176	0.219147	0.103619	0.232817	0.297534
	ATP content [nM] in media from 10 days-old hydroponically-grown WT
	Fo5176	0.00914887	0.00934562	0.00247905
	WT	0.180437	0.151082	0.151839
	WT + Fo5176	0.143404	0.0931301	0.0935325
	dorn1	0.161498	0.19126	0.199924	0.1075
	dorn1 + Fo5176	0.117911	0.122295	0.140363	0.1454
	ent3	0.176079	0.193888	0.112477	0.183845
	ent3 + Fo5176	0.209516	0.131062	0.209516	0.167748
	ent3nsh3	0.131007	0.145968	0.0844184	0.0931301
	ent3nsh3 + Fo5176	0.145959	0.168637	0.123729	0.112447
