# Supplementary material for: Soil-borne fungi alter the apoplastic purinergic signaling in plants by deregulating the homeostasis of extracellular ATP and its metabolite adenosine
Source: eLife. 2023 Nov 23;12:e92913. doi: 10.7554/eLife.92913 (PMC10746138; doi:10.7554/eLife.92913)
Supplement: Figure 2—source data 1. [file elife-92913-fig2-data1.xlsx]

## Sheet: Sheet1
Figure 2-source data 1
	A - cumulative vascular penetrations after transfer to treatment plates								B - Rootgrowth on plants grown on treatment plates							D - Ado/ATP ratio in media from 10 days-old hydroponically-grown WT
		dpi								primary root growth [mm]						Fo5176	0.00120277	0.0022587	0.00278252
		3	4	5	6					3	4	5	6	7		WT	0.000290532	0.000408681	0.000609042
	WT	0	0	1	2				WT	25.3329	40.0168	51.2042	65.3312	70.4517		WT + Fo5176	0.000742504	0.000644056	0.000932916
		0	0	0	0					27.4959	43.3137	56.8697	72.3191	83.936		dorn1	0.000541202	0.00103611	0.000420346	0.000717723
		0	0	0	2					29.0501	43.4054	55.8546	69.3869	73.8157		dorn1 + Fo5176	0.00194733	0.00100851	0.000648641	0.000778141
		0	0	0	0					27.6834	43.9508	57.7864	73.0306	75.5894		ent3nsh3	0.000969457	0.00078865	0.00113651	0.000902501
		0	1	3	5					27.8631	42.9584	56.0577	71.5711	79.1755		ent3nsh3 + Fo5176	0.00177119	0.000921489	0.00159508	0.00176435
		0	0	0	0					25.9414	40.6807	52.1458	63.0823	73.7352
		0	0	0	1					26.846	43.6982	55.1801	70.4873	80.7368
		0	1	2	2					26.6328	42.0889	52.8847	68.042	78.9316
		0	0	0	0					26.9376	42.1868	55.5101	67.485	69.7559
		0	0	2	4					26.514	41.8498	52.7444	66.2361	72.5143
		0	1	1	1					21.9665	35.3401	38.3515	59.8997	67.5642
		0	1	2	2					25.4798	40.1481	57.8745	66.4848	80.4151
		0	0	1	1					26.3609	40.6102	49.6397	64.177	81.4445
		0	0	0	1					25.7951	41.5762	50.282	69.4304	84.9103
		0	0	0	0					27.8727	45.0926	56.3169	61.6543	66.9736
		0	0	0	1					24.1184	36.3843	45.7901	63.6188	73.1055
		0	2	2	2					24.1099	38.402	49.2322	66.3698	75.4674
		0	0	0	0					26.2976	41.6305	53.1145	68.608	68.608
		0	0	1	1					23.5818	37.0184	46.945	59.6199	69.4932
		0	0	0	0					26.7312	42.0295	53.8808	69.2488	77.952
		0	0	0	0					28.8107	40.6015	55.3676	65.7584	75.2148
		0	0	1	2					29.5095	41.5653	56.789	67.6696	81.1523
		0	0	0	0					30.0227	43.296	58.2551	67.7705	81.2303
		0	0	0	0					27.3318	40.1045	55.1016	66.4996	71.8078
		0	1	1	1					28.1813	40.7405	55.977	66.4334	78.2491
		0	0	1	1					24.9489	36.4963	50.0857	61.5404	72.695
		0	0	1	1					28.8823	41.7172	56.4933	67.2647	79.4966
		0	0	1	2					26.4194	33.8757	56.0213	66.2731	72.5328
		0	0	0	0					35.1333	40.0656	60.6324	72.9733	76.7938
		0	0	0	0					21.8505	36.1226	43.5264	52.6907	61.9721
		0	0	0	0					24.0021	37.4875	47.7659	58.0058	68.0058
		0	0	0	0					26.2965	41.6278	52.0737	62.8096	72.0493
		0	0	1	2					24.8969	40.3717	50.5474	61.8129	71.0796
		0	0	0	1					19.9767	32.8978	41.6276	50.6887	58.5539
		0	0	0	0					20.24	30.6983	36.7616	49.4616	57.7418
		0	0	2	2					29.4759	46.0478	53.447	69.1358	80.2505
		0	0	0	0					19.3647	31.7911	42.3163	50.0103	54.8481
		0	1	1	2					22.0642	34.6529	42.7642	56.8356	64.6159
		0	2	2	2					24.4708	37.6006	47.4226	63.1106	70.2697
		0	0	1	2					24.1572	37.634	49.0603	58.1074	60.5066
		0	0	1	1					27.8716	39.9711	47.3137	54.2859	65.896
		0	0	0	0					30.3052	42.5454	51.251	62.7157	74.7562
		0	1	1	1					35.53	48.6183	59.1116	67.3206	71.1885
	dorn1	0	1	2	3					22.698	42.5629	53.7951	65.0176	69.8893
		0	0	1	2					29.6805	41.9265	54.1842	67.6588	72.7484
		0	1	1	2					32.0738	43.6377	56.3293	59.196	63.0421
		0	0	0	0					31.7293	41.244	45.5422	49.354	57.1397
		0	0	0	1					33.1745	46.06	58.8392	64.486	67.8193
		0	0	1	4					28.2098	38.7825	49.8937	56.3193	61.0472
		0	1	2	3				WT + Fo5176 pSIX::GFP	22.6618	29.9084	32.7152	37.4319	42.1991
		0	1	1	1					23.7403	27.3083	29.0835	32.1099	32.1099
		0	0	1	2					15.9823	20.5289	25.531	27.4429	28.6981
		0	1	3	3					21.3334	25.7177	25.7177	25.7177	25.7177
		0	2	2	3					23.9064	31.5293	37.3251	44.0802	45.8553
		0	0	1	2					16.9251	20.1887	22.1971	27.218	31.0583
		0	0	0	2					20.0459	21.9578	24.2172	25.2523	25.2523
		0	0	0	0					13.2127	18.2337	23.403	29.1875	34.0165
		0	0	0	0					17.1574	22.7145	24.3022	24.3022	24.3022
		0	0	0	0					21.2543	28.3016	34.6377	40.7511	45.4878
		0	1	1	1					15.6713	30.6189	37.7145	44.4778	49.0783
		0	0	0	0					17.618	27.2884	30.6378	30.6378	30.6378
		0	1	2	2					24.5501	29.4013	36.3137	40.8395	46.2588
		0	1	4	6					23.6824	31.0162	37.0046	41.879	45.0545
		0	0	1	1					22.3583	28.8676	35.5019	41.0125	45.8527
		0	1	1	1					22.1197	31.5016	38.8141	42.8621	44.4498
		0	0	3	3					21.8189	22.8189	23.8189	24.8189	25.8189
		0	0	3	3					15.3503	24.6183	31.2894	34.0224	34.0224
		0	0	0	0					22.1864	32.2833	38.5784	45.4685	49.4229
		0	2	4	5					22.3354	31.3989	39.7086	44.522	49.0621
		0	1	1	1					13.9125	17.1918	17.1918	17.1918	17.1918
		0	2	2	2					15.8215	23.9268	29.1788	35.3847	41.2441
		0	0	2	2					11.9658	14.4067	18.0031	22.2957	22.2957
		0	0	0	1					13.3793	18.7155	26.0961	33.0204	38.0576
		0	0	0	1					12.1852	16.4379	19.0178	19.0178	19.0178
		0	0	0	1					17.0983	20.2418	20.2418	20.2418	20.2418
		0	0	1	2					15.1484	20.8428	26.7724	29.1834	29.1834
		0	0	1	1					16.3736	25.6984	34.7632	40.4308	46.3238
		0	0	1	2					22.1955	28.7095	31.6277	31.6277	31.6277
		0	1	1	1					25.8949	35.2489	43.5524	49.8626	55.9166
		0	0	0	0					10.6298	11.6527	13.6985	13.6985	13.6985
		0	0	0	1					21.9147	31.6245	38.1609	40.6018	45.4307
		0	0	0	1					21.786	29.6484	36.683	42.3063	48.9053
		0	0	0	1					21.438	30.0594	32.6393	32.6393	32.6393
		0	0	1	2					20.5274	28.745	34.7204	40.8956	43.2823
		0	0	1	1					21.9334	25.3543	26.3799	26.3799	26.3799
		0	0	1	2					16.7375	18.6902	18.6902	18.6902	18.6902
		0	1	1	1					14.4809	17.3476	19.8716	19.6346	19.6346
		0	0	0	0					14.9347	17.2281	17.2281	17.2281	18.668
		0	1	2	2					18.3993	21.0141	22.628	22.628	22.628
		0	1	1	1					13.634	13.634	13.634	16.0665	17.0066
		0	0	2	4					23.2894	25.8147	25.8147	28.0795	28.0795
		0	0	1	1					15.7232	15.7232	15.7232	15.7232	15.7232
		0	0	0	0					12.1511	12.1511	12.1511	12.1511	12.1511
		0	0	0	1					13.4882	13.4882	13.4882	13.4882	13.4882
		0	0	0	3					12.8359	14.9031	14.9031	14.9031	14.9031
		0	1	4	4					14.046	17.1335	17.1335	17.1335	17.1335
		0	1	1	1					9.9774	13.0968	13.0968	13.0968	13.0968
	ent3	0	0	0	1					16.5425	19.6619	23.3952	23.3952	23.3952
		0	3	3	3					21.0185	24.8731	28.9836	28.9836	28.9836
		0	0	0	0				dorn1	20.5579	32.9499	42.5621	53.2529	64.6146
		0	0	0	0					21.0713	33.8432	42.8918	54.5967	67.2858
		0	1	2	3					21.927	35.4739	44.8026	56.1953	58.245
		0	1	1	1					21.989	33.8128	42.7735	55.335	67.0737
		0	1	2	3					22.7409	37.8565	48.2451	60.4159	63.1393
		0	0	0	0					23.5827	37.1062	46.4515	59.3946	62.8031
		0	0	1	1					24.4572	27.2071	29.9358	43.8545	50.6821
		0	1	1	3					12.5193	29.5908	41.7784	57.8025	60.8852
		0	1	2	3					28.9218	32.4637	37.9581	57.3315	61.7864
		0	1	2	2					18.6954	30.1788	38.1202	50.1755	61.8707
		0	0	0	1					16.131	26.8416	33.4624	43.9522	53.522
		0	0	0	0					19.875	31.2311	38.0143	49.1436	60.7119
		0	1	1	2					18.9554	32.1438	40.3583	52.7377	63.7294
		0	0	1	1					21.4432	34.9631	44.5025	57.8556	62.9733
		1	1	1	1					16.4509	29.3542	37.428	48.8199	58.8145
		0	0	0	0					17.6491	28.7998	36.9841	46.3644	55.7816
		0	1	1	1					21.2764	36.0478	44.81	57.092	61.1806
		0	0	0	0					21.6126	35.9066	44.0947	57.2815	66.3017
		0	0	1	4					17.6127	30.1225	36.4776	46.4122	55.9861
		0	0	0	0					34.3884	46.6083	57.94	69.4249	74.7345
		0	1	2	4					36.2779	49.1919	60.4285	65.8197	70.4086
		0	0	1	1					35.9913	50.5191	62.8913	68.3281	69.6596
		0	0	0	1					34.5524	47.2989	59.9621	66.591	70.1044
		0	1	2	3					30.2258	42.1856	54.5065	61.3565	65.9082
		0	0	0	1					32.9041	47.1478	58.002	67.7571	70.4902
		0	0	3	3					31.1031	45.2809	55.0538	64.6655	71.6555
		0	0	0	1					30.6298	45.5401	55.6678	66.3203	72.3267
		0	0	0	0					25.3114	38.4152	48.3248	55.8242	67.4338
		0	0	2	2					10.7492	47.1165	58.3124	68.5991	74.4703
		0	0	0	1					17.0501	48.1944	58.1379	61.7488	68.9091
		0	1	1	1					20.1622	50.8003	62.5963	70.3775	81.1125
		0	0	1	1					27.2523	41.3656	50.7033	60.7314	66.6494
		0	0	2	2					31.8808	47.266	58.1015	67.0591	72.8581
		0	0	0	1					26.6302	41.4582	50.4713	61.6958	70.8337
		0	0	0	0					25.6106	50.576	61.8291	66.4353	68.4882
		0	1	3	4					26.398	36.8941	47.8578	51.9942	58.0196
		0	0	0	2					29.431	40.1634	51.7394	66.3094	71.4376
		0	0	2	3					30.6492	42.662	54.0954	66.2531	70.1511
		0	0	0	0					26.4269	36.1885	46.7009	62.2665	67.2949
		0	0	0	0					28.8783	40.8825	53.0207	58.8358	63.3034
		0	0	0	0					28.5117	39.2379	49.8421	65.3799	70.8845
		0	0	0	1					27.8076	38.2942	48.1092	61.6013	67.3539
		0	0	0	1					24.9412	37.1507	47.6759	56.5173	66.0907
		0	0	1	3					28.0456	39.1776	48.9519	65.6456	74.1112
		0	0	1	1					29.9783	36.6352	46.973	57.3245	64.323
		0	0	0	1					22.281	32.16	42.3948	56.5776	65.1064
		0	0	0	0					27.8527	38.6897	49.1973	70.7415	75.1079
		0	1	2	2					25.4006	37.8344	48.5549	64.3557	74.1433
		0	1	1	1					27.5763	38.6143	45.1938	52.5533	61.8096
	ent3nsh3	0	1	2	3					27.9761	39.6355	51.221	66.2298	74.6027
		0	2	2	2				dorn1 + Fo5176 pSIX::GFP	23.2512	31.3828	36.4241	42.0411	46.3921
		0	0	1	2					18.1289	27.8018	31.4712	34.0126	39.6296
		0	1	1	2					23.714	30.5307	34.9969	37.0554	37.8627
		0	2	3	5					14.672	31.0175	33.3714	35.0841	35.0841
		0	1	1	2					25.4856	28.8438	34.8533	38.9702	41.5361
		0	2	3	4					23.1406	30.3021	31.2226	35.5706	35.5706
		0	0	0	1					25.5965	35.7131	38.5677	44.8891	49.8465
		0	0	0	0					32.0986	38.3786	46.3499	51.7358	56.1062
		0	6	6	6					26.2345	32.1357	37.0098	42.8321	43.8953
		0	2	2	2					26.9201	29.0528	30.9559	30.9559	30.9559
		0	1	2	2					27.9561	32.0953	35.3293	37.6708	37.6708
		0	2	3	4					26.4638	33.1042	38.165	42.8389	45.7772
		0	1	3	4					27.7343	35.6037	40.6992	47.6807	52.6486
		0	1	2	4					27.1367	32.9524	37.7214	44.6334	50.5542
		0	1	1	1					25.956	31.9521	36.7573	41.3272	46.2013
		0	0	1	1					17.2997	20.434	22.3401	22.3401	22.3401
		1	3	4	6					19.5256	22.3217	24.0603	24.0603	24.0603
		0	3	4	4					21.1579	28.2998	36.4112	41.7372	44.4649
		0	3	4	4					18.5298	23.1329	29.2302	34.6455	37.0865
		0	1	1	1					31.3279	42.2169	50.4036	55.0193	59.533
		0	3	3	3					9.2698	19.1365	26.2581	29.0698	32.0471
		0	0	0	0					21.3894	30.5545	38.2138	41.7341	46.0471
		0	1	1	2					20.7279	36.0484	43.3314	47.3838	52.0651
		0	0	0	1					16.6773	30.869	34.4855	36.1028	36.7848
		0	0	1	1					25.0817	34.1881	41.8684	45.7147	48.4899
		0	0	1	2					19.2623	26.7655	35.88	40.8279	46.3673
		0	1	1	1					26.1255	35.3326	41.7746	47.9261	52.9084
		0	1	1	1					25.2574	35.4963	43.904	50.5328	52.7556
		0	0	0	0					20.9244	31.7681	38.9935	44.8321	48.2289
		0	0	0	0					21.6832	27.9354	32.6723	33.5247	33.5247
		0	0	0	2					21.9551	30.2197	34.7496	40.6701	41.5882
		0	0	0	0					24.0808	33.8317	40.5761	45.3252	50.3218
		0	0	0	0					19.9743	21.5916	24.4033	24.4033	24.4033
		0	0	0	0				ent3	20.2996	39.7838	50.925	51.4959	56.9345
		0	0	0	0					28.3902	41.0283	50.9851	60.0243	63.8493
		0	0	1	1					21.8001	33.358	43.027	55.2544	64.6776
		0	0	0	1					29.6437	44.4388	55.9794	58.878	63.9388
		0	0	0	0					26.4437	40.7074	52.0757	58.0039	61.7524
		0	1	1	1					20.3956	39.6539	46.3101	50.0276	53.9572
		0	0	1	3					27.147	42.7733	56.0667	60.5053	62.9602
		0	0	2	2					26.3952	40.95	51.5644	64.5991	68.5581
		0	0	0	1					21.4529	35.4659	45.2913	56.6969	68.7149
		0	0	0	1					23.1023	37.2198	45.8384	49.0903	52.8581
		0	0	0	0					21.1213	34.2799	45.5882	58.0364	62.7442
		0	0	0	1					20.7296	33.6525	43.2512	54.7388	62.1738
		0	1	1	2					23.9973	38.6708	49.0472	61.7385	63.9513
		0	0	0	2					37.7276	48.1203	51.3543	57.2629	60.62
		0	2	4	5					21.8437	35.6726	44.1857	50.1431	55.9677
		0	1	1	1					23.0755	36.9051	48.3874	60.6067	63.298
		0	0	0	0					22.2475	36.2803	45.762	55.6355	60.8039
		0	0	1	1					20.6747	34.6234	43.9975	56.7949	61.7552
		0	1	1	3					23.1452	34.6346	47.2573	55.6526	65.0646
		0	0	0	1					20.9615	31.9137	42.5925	49.6837	63.3541
		0	0	2	3					20.9274	31.5949	45.2897	53.0046	63.8212
										19.8346	31.9296	45.895	55.7437	70.205
										23.1585	34.8229	49.2801	58.9152	74.8633
										21.4837	32.1099	46.4904	56.2473	71.9599
										21.6166	32.7836	46.0385	55.0313	64.0129
										23.3946	34.9763	47.7128	58.2889	70.3674
										26.2998	39.7665	52.1589	62.6823	69.3709
										23.2564	34.6111	46.7477	57.2531	63.3906
										26.3515	39.1718	52.6373	64.1262	68.0242
										24.7462	37.1124	50.5615	55.1034	60.796
										17.4835	26.3975	37.5115	46.1111	51.716
										25.8784	39.0424	53.2473	56.4907	62.8729
										26.7305	39.8353	51.8915	60.5555	64.6189
										26.158	38.2744	49.387	58.0696	62.2741
									ent3 + Fo5176 pSIX::GFP	21.3492	23.72	25.5923	25.5923	25.5923
										20.2405	22.3935	25.8358	28.7345	30.3492
										17.585	21.789	23.7297	23.7297	23.7297
										12.7633	17.0492	21.5268	28.334	33.2111
										18.5303	26.9539	34.3187	37.0896	40.6681
										14.9666	17.5704	21.6298	23.5601	25.9302
										16.4886	23.0496	23.0496	23.0496	23.0496
										19.7089	35.7841	40.0394	44.379	47.613
										19.046	31.4917	37.8105	42.9628	42.9628
										16.4154	35.3674	41.0362	46.6758	48.8556
										24.4274	33.3374	38.0303	40.7216	42.827
										23.9303	32.3032	35.4418	37.4984	39.6038
										24.3619	32.5721	46.9864	46.9864	51.9953
										24.8835	30.472	33.6381	35.9217	38.3588
										18.2781	31.6865	38.4102	42.8129	48.4531
										17.0194	22.9213	29.4784	34.4227	39.0277
										18.0684	21.2481	27.7377	31.843	38.1151
										18.6125	24.4335	31.0376	34.5616	36.2795
										18.7953	23.7591	31.2833	35.2482	37.1285
										14.7196	17.3344	18.7019	18.7019	18.7019
										18.0842	22.9278	30.3119	35.8677	40.1548
										19.0277	23.6853	32.5741	38.9904	45.5752
										15.4377	19.8447	26.9551	30.0367	31.4972
										20.4105	27.2707	34.6729	36.8486	37.5739
										14.0732	15.2199	16.4164	16.4164	16.4164
										22.3191	28.5795	36.5481	38.8731	40.3436
										23.3112	28.7086	36.3929	40.075	45.2485
										19.4429	24.6763	29.4608	29.8027	29.8027
										21.6571	23.205	23.205	23.205	23.205
										20.2709	23.6939	30.0377	33.6437	38.3716
										23.5176	27.7249	32.1988	39.0943	39.0943
									ent3nsh3	23.5404	35.7108	46.2555	58.1744	69.4733
										24.1188	37.5873	47.2941	58.8568	75.0166
										21.9662	35.5101	45.536	57.8524	69.0309
										24.9709	37.9339	49.6583	62.4534	73.6287
										24.3008	38.0956	48.9381	62.2555	70.1957
										19.4181	31.3993	40.7177	51.4964	63.6972
										20.3011	32.1604	46.0479	57.4328	66.5789
										20.8234	34.0281	41.9307	50.5458	67.4936
										17.0089	27.8649	36.4837	46.9259	58.842
										22.2138	33.967	43.9147	56.8544	70.5562
										21.1186	32.8851	42.6608	54.993	67.6981
										19.7483	32.2332	42.6688	55.7223	59.4824
										20.9882	32.1865	42.5286	50.0681	64.6205
										20.6618	31.8247	41.8833	54.5561	65.6329
										21.1872	32.6774	43.7851	53.1427	62.3927
										18.1467	28.4111	38.7156	47.2634	57.7259
										25.437	36.0094	46.6191	57.7412	67.2483
										27.8587	40.3653	55.4391	67.3055	69.0488
										24.4171	36.1659	56.5067	64.45	68.9238
										25.6123	38.8148	52.601	57.9919	66.9576
										22.4386	32.1585	41.5801	51.1503	60.032
										25.2763	36.7227	48.3876	60.1242	69.8299
										23.9317	35.2564	45.7194	56.4016	60.3922
										17.1135	26.534	34.7934	38.7803	44.5468
										27.0899	38.9684	48.7189	59.3815	69.3092
										27.6453	40.1822	52.6103	63.0151	65.7714
										23.3022	33.9711	44.7394	53.033	61.4508
										25.1375	38.7697	51.8948	63.9976	74.3368
										25.5411	38.0911	51.8449	64.0137	74.459
										19.5067	28.3996	37.0905	43.6655	50.3321
										26.2799	38.1856	50.7403	62.3907	73.8754
									ent3nsh3 + Fo5176 pSIX::GFP	15.4547	19.9166	22.7495	32.6359	32.6359
										17.4795	20.51	20.51	20.51	20.51
										13.505	19.9033	25.2173	31.2783	37.2649
										19.7537	24.8543	30.606	38.5185	42.8781
										17.6506	19.4277	24.9274	29.8282	29.8282
										18.1564	19.8585	23.7771	30.2002	36.0174
										9.6738	12.5724	12.5724	12.5724	12.5724
										16.4455	19.3441	21.2472	21.2472	21.2472
										19.4426	20.9354	20.9354	20.9354	20.9354
										18.7137	24.5756	28.3241	35.3871	38.2957
										27.3293	33.5832	38.9253	45.86	52.3415
										21.9848	25.7178	32.486	38.5016	43.4845
										20.943	25.712	26.5631	26.5631	28.7805
										13.1128	15.7164	21.5634	24.6451	29.132
										20.9149	27.7579	38.9705	42.4945	49.4744
										17.7052	22.8484	30.8543	35.32	38.3053
										24.0126	31.7609	40.5981	45.0739	51.9151
										16.5164	20.6224	28.631	31.8789	37.7806
										15.522	18.1257	22.0721	23.5326	23.5326
										15.5635	17.4045	20.5002	20.5002	20.5002
										13.4263	16.3322	16.3322	16.3322	16.3322
										17.3326	22.713	28.6837	33.6526	38.0296
										21.3746	26.6765	32.2242	37.3638	41.4805
										12.7533	18.7945	23.413	28.0631	28.0631
										19.8844	27.3593	32.0531	33.771	33.771
										14.7942	21.3621	28.9134	35.2422	40.29
										14.2552	22.3969	28.651	33.782	35.0265
										16.5952	24.533	31.3004	36.2932	39.6646
										15.3038	18.2098	22.0321	22.0321	22.0321
