# Supplementary material for: Soil-borne fungi alter the apoplastic purinergic signaling in plants by deregulating the homeostasis of extracellular ATP and its metabolite adenosine
Source: eLife. 2023 Nov 23;12:e92913. doi: 10.7554/eLife.92913 (PMC10746138; doi:10.7554/eLife.92913)
Supplement: Figure 3—figure supplement 1—source data 1. [file elife-92913-fig3-figsupp1-data1.xlsx]

## Sheet: Sheet1
Figure 3-Suppl 1-source data 1
	A, B, C - cytosolic calcium represented as normalized fluorescence intensity changes (ΔF:F) - WT
	time [sec]	control														50 µM Ado								10 µM ATP
	-180	-0.0291989	-0.013277	-0.000558867	0.0202757	0.0392535	0.0392535	0.0244037	-0.00077118	0.0461362	0.0553875	0.0271511	0.00280148	-0.0494342	-0.00567904	0.00625319	-0.00853661	0.0218152	0.0288877	0.0220729	0.0368466	-0.00374464	0.0473148	0.088084	0.0450157	-0.0349589	0.0285918	-0.0326396	0.0866274	0.0403052	0.0917439	0.017398	-0.00421801	-0.0306107	0.0195266	0.0782921	-0.0301737	0.0106693	-0.0115524	-0.0275766	-0.03253	0.0168113	0.00739811	0.000791508	0.0188025	-0.0111248	-0.0541344	-0.0159845	0.0505372
	-160	-0.0192164	0.0274593	0.00316692	0.052717	0.0183398	0.0183398	0.000122941	0.0443979	0.0317859	0.0553875	0.0371332	-0.00420222	-0.0410959	-0.0027416	-0.00140378	-0.00191492	0.0181515	0.046705	0.0412668	0.0125678	-0.0140122	0.0073867	0.0656381	0.0122573	-0.00902871	-0.0017396	-0.000219058	0.0470984	0.0494896	0.0296743	0.0170653	-0.011248	-0.00384556	0.018636	0.0453242	-0.0430384	-0.000969932	-0.0208743	-0.0328969	-0.038225	0.0174892	0.0050186	-0.00991712	0.0129351	-0.0203955	-0.0541344	0.00711448	0.00809126
	-140	-0.0529074	0.010863	-0.0033532	-0.00081103	-0.00579151	-0.00579151	0.0277846	-0.029415	0.000215254	-0.00511985	0.0221601	-0.0182096	-0.0142942	-0.0237932	0.00561511	0.0245718	0.0278102	0.00964508	0.0415334	0	-0.0112943	0.0165702	0.0307706	-0.00444734	0.00784155	-0.0228824	-0.00197152	0.0744323	0.0159313	0.04753	-0.00296065	-0.00215036	-0.0232272	0.0217532	0.0386234	-0.0252032	-0.00484966	0.00409495	-0.0367393	-0.0282017	0.0113883	0.00783075	0.000791508	-0.00386718	-0.00957973	-0.0392623	0.0126582	0.0452315
	-120	0.0219616	-0.0208208	0.0134128	0.0154096	-0.0250965	-0.0250965	0.00411851	-0.0448386	0.0296333	0.0181522	-0.0197644	-0.0373106	-0.0327576	0.0094977	-0.00459418	0.00864399	0.00216486	0.0300755	0.0223395	0.00342759	0.0231322	-0.00499102	-0.000174338	-0.0343855	-0.00496735	0.014229	0.0168675	0.0218671	0.0547882	0.00246578	0.000166328	-0.0182781	-0.0161514	0.0478035	0.0279021	0.0218701	-0.00789802	-0.0108866	-0.00806905	0.015536	-0.00985177	0.00869603	0.00987056	0.0182691	-0.00957973	-0.0442197	0.017278	0.0425786
	-100	0.00573995	-0.00573325	-0.00428465	-0.00243309	-0.0267053	-0.0267053	0.0287067	-0.0646689	-0.00480735	0.0169886	0.00519066	-0.0213931	-0.00952948	-0.012533	0.000510465	0.00399091	-0.0178185	-0.00152041	0.0068778	-0.0211368	0.0134686	-0.0073867	-0.0163006	0.0113895	-0.0137149	0.024845	-0.0133625	-0.0306981	3.53245e-05	0.00459145	-0.0166661	0.00115789	0.000307645	0.0112885	-0.00426171	-0.0170165	0.00900651	-0.0152146	-0.0302368	-0.0106611	0.00167209	-0.00190361	-0.00758916	-0.0110681	-0.0142151	-0.0263732	-0.00859281	0.0147234
	-80	-0.0104817	0.0214243	-0.0117362	-0.00567721	-0.00740026	-0.00740026	-0.0281534	-0.0327201	0.0188706	-0.00279265	0.00519066	0.00025468	-0.0083383	-0.0291785	0.00242471	-0.00996832	-0.00249792	0.00513137	-0.00485178	0.00628392	-0.00797246	-0.0245558	-0.0258891	-0.0254908	0.0206504	0.013783	-0.011172	-0.0433137	-0.0049101	-0.0251679	-0.009015	0.0102556	-0.0132287	-0.00719168	-0.00265351	0.00228057	0.0178745	0.00376203	-0.0213697	0.00710738	-0.00488069	0.00263909	0.00544743	-0.0222696	-0.00648949	0.0192346	0.00341865	-0.0184375
	-60	0.00698777	-0.00271575	0.0273845	-0.00892133	-0.0331403	-0.0331403	0.00565527	-0.0194998	-0.0241802	-0.0225739	-0.0257536	0.00534828	0.0142942	0.00900813	-0.000127616	-0.006568	-0.0144879	-0.0145864	-0.0125826	-0.00342759	0.00531497	0.014973	-0.0389644	0.0131251	-0.00153082	0.00602168	-0.0107338	-0.00546678	-0.0116217	0.00629198	-0.00854928	-0.00545861	0.0247654	-0.0245586	0.00243909	0.00812818	-0.00235555	0.0150814	-0.00127095	0.00756299	-0.00872198	0.0050186	-0.0047956	0.0257368	0.006644	0.0073369	0.00341865	-0.00782597
	-40	0.00324432	-0.0102595	-0.023845	-0.026764	-0.000965251	-0.000965251	-0.00971232	-0.00077118	-0.0306379	-0.0481731	-0.0237572	0.000891379	0.045265	0.00215412	-0.0055513	0.0122233	0.00183181	-0.052359	-0.0280444	-0.00771208	0.0092408	-0.0201637	-0.0492068	-0.005749	-0.00840389	-0.0358178	0.0102957	-0.0382675	-0.0218658	-0.0511011	0.006886	-0.0013233	0.0104599	-0.0263398	-0.0334772	0.0174844	-0.00374117	0.0077571	0.0285816	0.0323933	-0.00894794	-0.0196418	0.0117329	-0.0329377	0.013597	0.0559191	-0.0206043	-0.0701685
	-20	0.0194659	0.00331925	-0.00894188	-0.0235199	0.0247748	0.0247748	-0.0284608	0.0620249	-0.0421181	-0.0283919	-0.0586943	0.0448236	0.0583681	0.0207579	-0.00363706	0.00613848	-0.0158202	-0.0352544	-0.0421732	-0.0114253	-0.0125023	-0.00219605	-0.042887	-0.00249485	0.0328345	-0.00780588	0.0374589	-0.019344	-0.0575435	-0.0315449	0.00309371	0.0205938	0.0178434	-0.0149845	-0.0634967	0.0312262	-0.00595815	0.0197423	0.0463157	0.0280651	-0.0231833	-0.0256987	0.00684421	-0.00706761	0.0120519	0.057902	-0.0159845	-0.0051731
	0	0.0544048	-0.0102595	0.00875559	-0.0202757	0.016731	0.016731	-0.0244652	0.086262	-0.0248978	-0.0388643	0.0311439	0.0269961	0.0375223	0.0325076	0.000510465	-0.0285806	-0.021149	-0.0167245	-0.0464385	-0.0154242	-0.00163073	-0.0269515	-0.0110704	-0.00922009	0.0112781	-0.0192248	0.00547645	-0.0929352	-0.0646084	-0.0744835	-0.00741825	0.0106691	0.0336871	-0.0459332	-0.0886917	0.0344424	-0.0117777	0.00809002	0.0832619	0.018953	0.00822487	0.0106429	-0.0131763	0.00146686	0.0390915	0.0777315	0.017278	-0.059557
	20	0.119291	-0.112855	0.0674367	-0.143552	-0.0910553	-0.0910553	-0.0465945	0.134736	-0.0751238	-0.0726088	0.00618886	0.0148988	0.0798094	-0.049251	0.0247575	0.0240349	0.0131557	-0.0480829	-0.04164	-0.0177092	-0.01824	-0.0109802	-0.00910914	-0.00770149	0.000656065	0.0373344	-0.075575	-0.119428	-0.000671165	-0.0757589	-0.0127408	0.0449921	0.00399939	-0.0330194	-0.0254362	-0.0231565	-0.00900651	-0.0155475	0.0752815	-0.0190897	-0.00307303	0.00415333	-0.00223485	0.0902787	0.0437268	0.0707912	0.0237457	-0.0529248
	40	0.100574	-0.115872	0.061848	-0.106245	-0.041184	-0.041184	-0.0450578	0.155668	-0.0435531	-0.0656272	0.0161709	0.0295428	0.0958904	-0.0605111	-0.00140378	0.0199187	0.00682764	-0.0290778	-0.0650992	-0.0274207	-0.00948239	-0.0385306	0.0364365	-0.044148	0.0159643	1.26745	-0.0282585	0.0113541	-0.0349359	-0.0459995	0.036559	0.0110826	0.00846024	-0.0466012	0.740063	0.395825	-0.00872939	0.440224	0.431738	0.303021	0.0409888	0.0192957	0.00172269	0.744499	0.0506799	0.256197	0.0791832	0.0478843
	60	0.0993262	-0.0947495	0.0562593	-0.101379	0.0344273	0.0344273	-0.0413696	0.155668	-0.0320729	-0.0737724	0.0331403	0.0556475	0.106611	-0.0644277	0.00848647	0.028509	0.0158202	-0.00508386	-0.0629665	-0.0177092	-0.0122003	-0.0477141	0.0536524	-0.0350363	0.0353338	1.67755	0.0519168	1.18419	-0.0204529	0.0577332	0.643325	-0.00835332	0.175204	-0.0437067	2.58171	0.673002	-0.00484966	0.755169	0.804451	0.522621	0.214073	0.0279484	0.00451625	1.09895	0.0862176	0.584374	0.399797	0.557236
	80	0.0606439	-0.0841883	0.0860656	-0.0770479	0.0151223	0.0151223	-0.0370666	0.130329	-0.037813	-0.0365371	0.0521062	0.0760219	0.142347	-0.0531675	0.00529607	0.0274353	0.00149875	-0.0174372	-0.0688313	-0.00428449	-0.00374464	-0.0153723	0.185713	-0.0378566	0.0125277	1.55837	0.252574	2.41842	0.134975	0.370632	1.39686	-0.00173683	0.468389	0.0268742	3.29548	0.87182	0.0159346	0.798782	0.831939	0.656112	0.442742	0.0774855	0.0655089	1.07894	0.109394	1.0583	0.589208	0.814564
	100	0.106813	-0.079662	0.0851341	-0.119221	0.0569498	0.0569498	-0.0164741	0.195329	-0.0177226	-0.0877356	0.0251547	0.0881192	0.128052	-0.0673651	-0.00587034	0.00220126	-0.00216486	-0.014824	-0.067765	-0.0299914	-0.00102676	-0.0572969	0.333682	0.0552121	0.0681371	1.41269	0.647317	2.32759	0.688156	1.02619	1.64735	0.0276239	0.908783	0.177387	3.52304	0.81042	0.0575031	0.813097	0.876866	0.596428	0.709373	0.140651	0.150014	1.016	0.148795	1.37557	0.849764	1.03608
	120	0.111804	-0.0525045	0.105626	-0.0932685	0.0521236	0.0521236	-0.0238505	0.239396	0.0296333	-0.0330463	0.0201637	0.071565	0.139369	-0.0487614	-0.0128892	0.00238023	-0.0168193	0.0448045	-0.0568351	-0.013996	-0.00434861	-0.0584947	0.608046	0.244604	0.110938	1.25229	1.09025	1.9222	1.49073	1.75062	1.51682	-0.0141428	1.032	0.385345	3.43459	0.789661	0.137869	0.813763	0.84524	0.596428	0.880197	0.202085	0.259195	0.897586	0.27704	1.45786	0.9514	1.243
	140	0.0768655	-0.0147858	0.113077	-0.0786699	0.113256	0.113256	-0.00387263	0.206346	-0.00408983	-0.0505003	0.0231583	0.114861	0.150685	-0.0717713	-0.00746554	0.00667538	-0.0221482	0.0274623	-0.0688313	0.00457012	0.00984478	-0.0684767	0.93689	0.58195	0.34306	1.15433	1.41227	1.95627	1.79982	1.91599	1.43831	0.0921346	1.06537	0.784116	3.3196	0.655751	0.208813	0.793788	0.826028	0.488678	0.900985	0.295751	0.328569	0.812508	0.470179	1.29328	0.933845	1.22045
	160	0.106813	-0.0389258	0.112146	-0.0851582	0.023166	0.023166	-0.0167814	0.226176	-0.0320729	-0.0155923	0.0910361	0.125684	0.131626	-0.0737296	-0.010975	0.00238023	-0.0171524	0.0595334	-0.0589678	0.00371323	0.00984478	-0.0441206	1.26334	1.07658	0.693586	1.17244	1.78116	2.02229	1.91886	2.14387	1.37031	0.1033	1.05661	1.17509	3.08105	0.623005	0.266454	0.803775	0.820116	0.441979	0.797496	0.355672	0.393519	0.783971	0.563659	1.10391	0.831285	1.02281
	180	0.113052	-0.037417	0.124255	-0.0608273	0.0875161	0.0875161	-0.015552	0.204142	-0.0643611	-0.0190831	0.103015	0.11104	0.151281	-0.0747087	-0.0253318	0.0206346	-0.0101582	0.0457547	-0.0557688	-0.0134247	0.00742888	-0.0373328	1.45271	1.46773	1.13409	1.20902	2.2552	1.94575	1.9019	2.28799	1.29952	0.255479	1.04046	1.42224	2.90415	0.577978	0.30442	0.798116	0.805338	0.410543	0.842236	0.445228	0.424015	0.704227	0.630871	1.02062	0.661277	0.932617
	200	0.136761	-0.0766445	0.136364	0.0105434	0.0553411	0.0553411	-0.0060241	0.165583	-0.0607735	-0.0330463	0.113995	0.132688	0.153663	-0.059532	-0.0199081	-0.00388353	-0.0298085	0.0661852	-0.0309768	0.00656955	0.0192064	-0.0772609	1.48278	1.71331	1.47056	1.16281	2.55137	1.78007	1.9563	2.23399	1.36366	0.476718	1.07722	1.5614	2.77228	0.544354	0.295829	0.778806	0.782284	0.384346	0.788458	0.499091	0.456141	0.615415	0.656366	0.896688	0.608611	0.868948
	220	0.0968305	-0.0389258	0.169896	-0.0673155	0.0794723	0.0794723	-0.0066388	0.147956	-0.0593385	-0.00511985	0.0720703	0.156883	0.136986	-0.0580633	-0.00618938	0.00900191	-0.0364696	0.0462299	-0.0392408	0.0157098	0.0225282	-0.0712717	1.49804	1.69422	1.78172	1.14327	2.63111	1.74348	1.96867	2.02185	1.38395	0.801753	1.14336	1.6135	2.66266	0.508684	0.335458	0.711223	0.780215	0.366121	0.744396	0.492602	0.479886	0.575943	0.699629	0.828277	0.597524	0.777424
	240	0.144248	0.0078455	0.158718	-0.0202757	-0.00579151	-0.00579151	-0.00879026	0.113804	-0.037813	-0.0446823	0.0551008	0.163886	0.159619	-0.0433761	-0.0135273	0.0354887	-0.0118235	0.0362522	-0.0339091	0.0254213	0.0207163	-0.0513076	1.52114	1.64194	1.87638	1.12623	2.67141	1.77628	2.02731	1.90962	1.34277	1.23679	1.15998	1.62686	2.56375	0.525934	0.364833	0.672271	0.740904	0.389813	0.733776	0.45042	0.529705	0.529004	0.705037	0.751933	0.575349	0.74161
	260	0.100574	-0.025347	0.189456	-0.0332522	0.0472973	0.0472973	-0.00940497	0.130329	-0.0701012	-0.0551548	0.056099	0.128868	0.161406	-0.0536571	-0.026608	0.0251087	-0.0278102	0.0550197	-0.0304436	0.00114253	0.0379296	-0.0676782	1.49651	1.54409	1.88013	1.11865	2.51062	1.86754	1.93476	1.83097	1.2612	1.69539	1.13183	1.65625	2.45466	0.522426	0.354302	0.661617	0.779032	0.400747	0.694911	0.393311	0.511314	0.455127	0.71508	0.707317	0.60122	0.676615
	280	0.124283	-0.0419433	0.182004	-0.00081103	0.048906	0.048906	-0.0238505	0.102787	-0.039248	-0.0539912	0.0660811	0.125684	0.154258	-0.0110643	-0.0211843	0.0313725	-0.0161532	0.0507436	-0.026978	0.019423	0.0358157	-0.0808545	1.51613	1.53411	1.85451	1.11312	2.33844	1.90833	1.8906	1.76762	1.26965	2.14531	1.12398	1.64356	2.49514	0.508391	0.417764	0.607351	0.752135	0.398469	0.697849	0.40694	0.519927	0.419389	0.762206	0.673607	0.540238	0.634169
	300	0.121787	-0.0328908	0.161513	-0.104623	-0.00579151	-0.00579151	-0.0247726	0.106092	-0.0514458	-0.0260647	0.0401278	0.147332	0.146516	-0.0159601	-0.0179939	0.0657337	-0.0128226	0.0250867	-0.0293773	0.0282776	0.0394395	-0.0521062	1.46426	1.59334	1.82327	1.0992	2.12158	1.91548	1.81324	1.70513	1.2306	2.24167	1.19089	1.56006	2.37532	0.564236	0.406402	0.569065	0.67913	0.415554	0.66034	0.377304	0.489198	0.410588	0.790791	0.694428	0.551326	0.632843
	320	0.128026	-0.0268558	0.182936	-0.0656934	0.0472973	0.0472973	-0.0324564	0.0873637	-0.0535983	-0.0411915	0.0371332	0.150516	0.138177	-0.0384804	-0.00587034	0.0562485	-0.00449625	0.0241365	-0.0163148	0.0417024	0.0213203	-0.0385306	1.44748	1.60527	1.88356	1.03336	2.07163	1.87847	1.71045	1.68515	1.23	2.19039	1.16274	1.59502	2.34397	0.543769	0.513925	0.552086	0.699229	0.433323	0.673671	0.391581	0.476627	0.39832	0.801607	0.695419	0.557794	0.623558
	340	0.131769	-0.0706095	0.187593	-0.0478508	0.0537323	0.0537323	-0.0226211	0.0565165	-0.0335079	-0.0318827	0.0680775	0.151789	0.148303	-0.012533	-0.0240556	0.0881042	-0.0118235	-0.00508386	-0.0408403	0.0551271	0.0189044	-0.0660811	1.41	1.6376	1.83077	1.04309	2.02344	1.81161	1.74683	1.63583	1.21097	2.23753	1.12106	1.5801	2.3043	0.554295	0.548289	0.506475	0.648686	0.430589	0.655821	0.381414	0.476394	0.398853	0.807015	0.678564	0.557794	0.632843
	360	0.109309	-0.0691008	0.168033	-0.0689376	0.0537323	0.0537323	-0.0671871	0.0631266	-0.0514458	-0.0295555	0.0481134	0.124411	0.158428	-0.0027416	-0.0179939	0.0609016	-0.0041632	0.0319761	-0.0323097	0.0779777	-0.0022347	-0.0413256	1.43506	1.65235	1.86857	1.00491	1.9494	1.90496	1.673	1.64178	1.19667	2.28137	1.16044	1.63131	2.22978	0.485001	0.588749	0.505477	0.646026	0.368172	0.660114	0.360215	0.45102	0.408188	0.830964	0.725164	0.571653	0.749569
	380	0.0856002	-0.0298733	0.16617	-0.0754258	0.0521236	0.0521236	-0.0389107	0.0333811	-0.036378	-0.00162904	0.036135	0.139055	0.118523	-0.00323118	-0.018632	0.0673443	-0.00982515	-0.000332589	-0.0296438	0.0568409	-0.00404663	-0.0521062	1.4623	1.60267	1.85513	1.04416	1.87404	1.91716	1.65145	1.60224	1.23545	2.31197	1.13767	1.63866	2.19842	0.492603	0.603159	0.493824	0.604942	0.397558	0.679772	0.356537	0.428206	0.388185	0.861867	0.787626	0.544858	0.688553
	400	0.119291	-0.0389258	0.170827	-0.0754258	-0.002574	-0.002574	-0.0515122	0.0488047	-0.0564684	-0.0388643	0.036135	0.130778	0.138177	0.0168413	-0.018951	0.0825563	-0.00882598	-0.00152041	-0.0557688	0.0742645	-0.0103884	-0.0584947	1.38298	1.5506	1.88919	1.01401	1.80131	1.92809	1.66912	1.56696	1.30877	2.23505	1.17182	1.65491	2.14214	0.447576	0.606485	0.457869	0.587799	0.330812	0.670508	0.325387	0.420989	0.366582	0.881953	0.758874	0.55225	0.689879
	420	0.113052	-0.00875075	0.150335	-0.109489	0.0617761	0.0617761	-0.0588886	0.0873637	-0.0593385	-0.0190831	0.0531044	0.149242	0.136391	0.0305493	-0.0179939	0.074324	0.00183181	0.0279375	-0.0403071	0.0916881	-0.0115963	-0.0800559	1.41174	1.53954	1.85076	1.07333	1.80964	1.90749	1.5582	1.55676	1.25129	2.24374	1.20182	1.61595	2.08263	0.464534	0.596785	0.446216	0.586321	0.377512	0.715248	0.312192	0.388397	0.414322	0.840235	0.771763	0.567033	0.681921
	440	0.0756177	-0.0283645	0.128912	-0.0592052	0.00546975	0.00546975	-0.0558151	0.0466013	-0.0701012	0.000698162	0.0231583	0.139692	0.109589	0.0266327	-0.00299898	0.0902518	-0.0294754	0.00489381	-0.049904	0.103685	-0.0149182	-0.0660811	1.39039	1.50396	1.78172	1.05469	1.81358	1.91001	1.47907	1.51807	1.25774	2.22347	1.20566	1.63599	2.01053	0.495234	0.607593	0.429903	0.539621	0.405987	0.723382	0.318249	0.392821	0.418589	0.855686	0.79655	0.55687	0.708449
	460	0.123035	-0.0464695	0.149404	-0.081914	0.00546975	0.00546975	-0.0392181	0.068635	-0.0715362	-0.0260647	0.0331403	0.120591	0.0750447	0.0364242	-0.0237366	0.0709236	-0.0138218	-0.0193377	-0.0285775	0.0994002	-0.0215619	-0.0764624	1.40869	1.52262	1.79609	1.08332	1.87755	1.91127	1.43739	1.56568	1.17997	2.25201	1.24427	1.66693	1.95317	0.447576	0.553	0.447548	0.553217	0.381384	0.697849	0.332526	0.39445	0.42259	0.845643	0.793575	0.55687	0.772118
	480	0.111804	-0.0147858	0.130775	-0.130576	-0.0492278	-0.0492278	-0.054893	0.0135507	-0.0428356	-0.0539912	0.0471152	0.125684	0.120905	0.0300597	-0.0333078	0.0798719	-0.00616153	0.0184349	-0.0475048	0.113967	-0.0399831	-0.0780595	1.37143	1.55299	1.71861	1.08725	1.87054	1.8217	1.44269	1.57716	1.18815	2.30535	1.27857	1.62641	1.93575	0.454593	0.607316	0.412591	0.507995	0.401886	0.714796	0.304621	0.377223	0.388985	0.846415	0.763831	0.537467	0.712429
	500	0.109309	-0.0389258	0.124255	-0.0754258	0.0183398	0.0183398	-0.0684165	0.0675333	-0.0607735	0.00302537	0.0201637	0.107857	0.101251	0.000195829	-0.0285222	0.0671654	-0.0338052	0.00418112	-0.0395074	0.0936875	-0.0242798	-0.084448	1.37252	1.48747	1.77047	1.11811	1.83724	1.79058	1.5045	1.52487	1.20997	2.33016	1.33456	1.62574	1.92101	0.488217	0.590689	0.433565	0.464251	0.423072	0.685873	0.29878	0.337881	0.423923	0.806242	0.787626	0.55225	0.754875
	520	0.0781133	-0.055522	0.122392	-0.127332	-0.00579151	-0.00579151	-0.0899312	0.0543131	-0.0234627	-0.00744706	0.0451188	0.123774	0.11078	0.0271223	-0.0333078	0.069134	-0.0351374	0.0170095	-0.0626999	0.10397	-0.0339433	-0.0676782	1.31695	1.47576	1.71267	1.1025	1.9069	1.84188	1.51793	1.59799	1.2308	2.26234	1.33056	1.54626	1.85159	0.449623	0.559928	0.406599	0.491443	0.410543	0.701238	0.295103	0.350219	0.412722	0.771477	0.815388	0.481105	0.709776
	540	0.138008	-0.0585395	0.126118	-0.111111	0.029601	0.029601	-0.0865503	0.0454996	-0.0514458	0.0262974	0.046117	0.117407	0.0929124	0.0271223	-0.0387315	0.0829143	-0.0361366	-0.0181499	-0.0477714	0.102828	-0.0472308	-0.0776602	1.31891	1.5365	1.73985	1.105	1.97218	1.87132	1.49285	1.65114	1.22122	2.28095	1.42009	1.52911	1.77199	0.434419	0.56935	0.396611	0.468093	0.385257	0.68994	0.255083	0.347192	0.389785	0.786156	0.777712	0.520835	0.734978
	560	0.106813	-0.0389258	0.129844	-0.12571	0.0456885	0.0456885	-0.0773297	0.0146524	-0.0643611	0.0239702	0.0521062	0.109767	0.144729	0.0109664	-0.0221414	0.079156	-0.026811	-0.0136361	-0.0557688	0.108255	-0.0257897	-0.0912358	1.29908	1.47597	1.70643	1.13016	2.02694	1.87468	1.48366	1.7757	1.18602	2.35663	1.42132	1.53846	1.71757	0.420677	0.538035	0.376303	0.452724	0.386168	0.681128	0.258328	0.337648	0.388452	0.822466	0.794567	0.491269	0.746916
	580	0.151734	-0.037417	0.161513	-0.117599	0.0199485	0.0199485	-0.0813253	0.00473725	-0.0342254	0.0297882	0.0790577	0.0874825	0.122096	0.0310389	-0.034584	0.0675233	-0.0318068	-0.0483204	-0.0584346	0.128535	-0.041191	-0.0820523	1.26661	1.47445	1.76953	1.2001	2.01249	1.86417	1.43915	1.66261	1.14224	2.33264	1.43701	1.4759	1.6696	0.451962	0.53083	0.373972	0.436467	0.401203	0.669152	0.260924	0.346261	0.428991	0.817058	0.781678	0.531923	0.708449
	600	0.113052	-0.0162945	0.137295	-0.122466	0.0376448	0.0376448	-0.0816327	-0.00077118	-0.0543158	0.0402606	0.051108	0.108494	0.14056	0.0261432	-0.027246	0.0804088	-0.0348043	-0.0416686	-0.0568351	0.137675	-0.0535725	-0.101617	1.22171	1.44647	1.65707	1.18877	2.02432	1.79226	1.45646	1.73914	1.17651	2.39343	1.41978	1.5044	1.57364	0.482369	0.528336	0.348337	0.426714	0.418516	0.663051	0.274985	0.334621	0.395119	0.858776	0.843149	0.509748	0.671309
	620	0.126778	-0.0464695	0.186662	-0.143552	0.0601673	0.0601673	-0.0914679	0.0377878	-0.0449882	0.0530603	0.0710721	0.0989431	0.121501	0.0393616	-0.0578739	0.084167	-0.0407993	-0.0145864	-0.0640328	0.116824	-0.0611222	-0.0920343	1.25244	1.4328	1.67519	1.22517	1.99715	1.72456	1.39076	1.67707	1.21343	2.46084	1.50054	1.54336	1.56024	0.555172	0.558542	0.365982	0.448881	0.476149	0.673445	0.263953	0.307617	0.420723	0.833282	0.839183	0.551326	0.662024
	640	0.0955827	-0.00875075	0.15965	-0.0997567	0.0279923	0.0279923	-0.0810179	0.0399912	-0.00193729	0.00884338	0.0521062	0.119954	0.113758	0.00656027	-0.0323507	0.0426472	-0.0318068	-0.0048463	-0.0634997	0.121108	-0.0396811	-0.0912358	1.19426	1.46144	1.64738	1.25773	2.00197	1.75315	1.33071	1.6252	1.15296	2.55843	1.46301	1.5467	1.54684	0.555465	0.530276	0.332024	0.440605	0.518065	0.678642	0.264602	0.33532	0.382051	0.854141	0.819354	0.516215	0.671309
	660	0.100574	-0.0464695	0.171759	-0.135442	0.0633848	0.0633848	-0.0853209	0.0587198	-0.0894741	0.015825	0.0750649	0.124411	0.136986	0.0232057	-0.0422409	0.0730712	-0.0487927	-0.0103103	-0.0459053	0.148529	-0.0587063	-0.103214	1.23217	1.37726	1.66238	1.26388	2.00854	1.72204	1.36568	1.72043	1.19254	2.54437	1.47239	1.52755	1.49538	0.592889	0.533601	0.346007	0.419915	0.512142	0.64859	0.272605	0.331595	0.399387	0.826329	0.832243	0.524531	0.650086
	680	0.160469	-0.0238383	0.145678	-0.153285	0.0569498	0.0569498	-0.0659577	0.0917704	-0.0162876	0.0530603	0.0760631	0.133325	0.120905	0.0192891	-0.0550026	0.101527	-0.0411324	-0.0347793	-0.0544359	0.128249	-0.066558	-0.0916351	1.23784	1.37184	1.57459	1.2753	2.06594	1.7233	1.37416	1.70725	1.1292	2.55595	1.55038	1.52355	1.4943	0.644056	0.52501	0.339681	0.461295	0.567953	0.641811	0.286017	0.354176	0.375383	0.817058	0.858021	0.506976	0.668656
	700	0.123035	-0.0540133	0.189456	-0.114355	0.0344273	0.0344273	-0.0920826	0.107194	-0.0952142	0.015825	0.109004	0.128231	0.129244	0.0339763	-0.0310745	0.0911466	-0.0574521	-0.059961	-0.0704308	0.141959	-0.0671619	-0.101617	1.19883	1.40113	1.57396	1.24979	2.08127	1.77082	1.35649	1.68727	1.19627	2.48027	1.54161	1.47456	1.38119	0.671247	0.515588	0.347338	0.4743	0.585949	0.653335	0.252271	0.346727	0.387652	0.807787	0.81043	0.519911	0.601008
	720	0.124283	-0.0298733	0.228577	-0.114355	0.0569498	0.0569498	-0.0785591	0.0708384	-0.0557509	0.0553875	0.0890397	0.131415	0.0982728	0.021737	-0.0336268	0.113159	-0.0434638	-0.0388179	-0.0690979	0.146815	-0.064746	-0.0948293	1.19099	1.37553	1.58146	1.29841	2.18817	1.70606	1.43138	1.65709	1.10425	2.62294	1.59329	1.46944	1.36726	0.678264	0.505889	0.33269	0.486419	0.595745	0.657176	0.261573	0.365351	0.364982	0.826329	0.838192	0.563337	0.619578
	D - maximal amplitude of cytosolic calcium represented as normalized fluorescence intensity changes (ΔF:F) - WT
	control	50 µM Ado	100 µM Ado	200 µM Ado	10 µM ATP	10 µM Ado + 10 µM ATP	50 µM Ado + 10 µM ATP	100 µM Ado + 10 µM ATP	200 µM Ado + 10 µM ATP
	0.160469	0.0247575	0.0110903	0.0501464	1.52114	3.47332	1.28176	2.09893	1.57433
	0.0078455	0.113159	0.0107476	0.193194	1.71331	1.95328	0.964473	2.93018	3.45245
	0.228577	0.0158202	0.0153415	0.014303	1.88919	2.07748	2.04243	3.83272	2.73552
	0.0105434	0.0661852	-0.00558659	-0.0067617	1.67755	1.08366	2.08042	2.22829	2.84345
	0.113256	-0.0163148	0.0097533	-0.039481	2.41842	1.37071	2.45855	2.48019	1.05194
	0.113256	0.148529	0.0663422	0.0249049	2.02731	1.22058	1.66565	1.62368	1.04697
	-0.00387263	0.0394395	0.0521521	-0.039994	2.28799	3.04956	2.2264	2.73661	1.35552
	0.239396	-0.0109802	0.0989557	0.00860232	1.64735	2.33255	4.01306	1.55593	1.73812
	0.0296333		0.00725163	0.0633757	2.62294	1.1534	1.82251	1.73491	1.17216
	0.0553875		-0.0278857	0.00641026	1.59329	1.45081	1.72565	1.86431	1.05397
	0.113995		0.0456595	0.0470437	1.66693	2.61189	3.9653	2.59806	1.54735
	0.163886			0.114426	0.87182		1.5784	1.75468	2.16669
	0.161406			0.0474646	0.607593		1.31506	3.09973	1.57713
	0.0393616			0.0719906	0.813763		1.26165	0.89887	2.2487
					0.876866		1.36485	0.750874	2.07497
					0.656112		0.942606	1.2849	1.49918
					0.900985		3.58908	1.944	1.9967
					0.499091			2.11229	0.883799
					0.529705			1.66138	1.11646
					1.09895			1.37358	2.11391
					0.881953			0.559955	3.34944
					1.45786			1.58322
					0.9514			2.73421
					1.243			2.14244
					1.02083			2.11645
					1.10467			1.03319
					1.67384			0.82791
					1.90139			2.73952
					2.24163
					2.01319
	E, F - cytosolic calcium represented as normalized fluorescence intensity changes (ΔF:F) - ent3nsh3
	time [sec]	control										50 µM Ado control							10 µM ATP													200 µM Ado												200 µM Ado + 10 µM ATP
	-180	-0.00377395	-0.0262602	-0.00668296	0.0117419	0.0491913	-0.0106423	-0.0291663	0.00376243	-0.00128581	0.0305899	-0.0170862	-0.0255555	-0.0233079	0.0188077	0.0353902	0.0422448	0.0131569	0.00730832	0.0136084	0.00523194	0.0133926	0.0244168	0.00186478	0.0154466	-0.00360036	0.0282149	0.0149581	0.0204583	0.0114733	0.0274124	-0.00892451	0.0145024	0.0072058	-0.00189725	-0.0120359	0.00331975	0.0368543	0.0146151	0.0164325	-0.012102	-0.0125843	-0.0400409	0.0453609	-0.00772048	-0.000758876	0.0492289	0.0180592	0.0220482
	-160	0.00106445	-0.0219553	-0.024628	-0.00592567	-0.0167955	-0.003912	-0.0239689	-0.0150497	-0.00834721	-0.0194001	0.0107817	-0.00700716	-0.00888544	-0.00793223	0.0159028	0.0410934	0.0093088	-0.0021688	-0.00316622	-0.0153455	0.0118372	0.0112592	0.0205126	0.0274476	0.019982	0.0113659	-0.00189162	0.015819	-0.0118931	0.0514535	-0.0348566	-0.000649361	0.0240152	-0.00311148	-0.00997174	-0.00497963	0.0136802	-0.0222844	-0.0117292	-0.00990866	-0.000212638	0.00119271	0.0446892	-0.00541093	-0.0190709	0.0143122	0.050051	0.00325345
	-140	0.0172731	-0.0258502	-0.0139538	-0.00608202	0.00349855	-0.011063	0.0169984	-0.00803249	0.0139963	0.0194443	0.00415734	-0.0068198	-0.00172464	-0.00936793	0.0237262	0.0179503	0.0142564	0.0104066	0.00144681	0.0192421	-0.0096284	0.0159583	0.0152318	0.029964	0.0136814	-0.0189051	0.0332385	-0.00492127	0.0282636	0.00171327	0.0135592	1.66503e-05	0.0238916	0.00660241	0.00527168	-0.00995926	0.0101916	0.00955045	0.0167228	-0.011973	-0.00214571	-0.00562276	0.0328229	0.00927117	0.018378	-0.00357804	0.0348665	0.0346213
	-120	0.0090478	0.000389496	0.0047647	0.00486249	-0.00123259	-0.000967484	-0.00914121	-0.0032548	-0.0176219	0.0277208	-0.0052081	-0.0171244	0.00513358	0.00768099	-0.00799408	0.00701201	0.0151726	0.0136871	0.00689858	-0.00812154	1.55548e-05	-0.0193793	0.00863079	-0.00894274	-0.0090009	0.0223606	0.0125737	0.0010825	0.029243	0.00682547	0.00748997	0.0086748	0.0169701	-0.00675419	0.00161961	0.000905387	-0.00301513	-0.025902	0.00307746	-0.00487692	0.00519998	-0.00528199	0.00909009	-0.00475106	-0.00257358	0.0259099	0.0151614	-0.014634
	-100	-0.00135475	0.000594494	-0.0362303	0.0154943	0.0124628	0.00239768	-0.0225932	-0.0135567	-0.0226808	-0.0125582	0.00712687	0.0192228	0.00321732	0.00247658	0.00879065	0.00390324	-0.0141464	0.0379267	0.00480174	-0.00045971	0.00685965	0.00599613	-0.0136475	0.00073555	0.00738074	0.00708227	-0.0127009	0.021277	0.0214076	0.00599646	0.00514504	-0.00431243	-0.0147948	0.0135843	0.0278192	0	0.000722633	-0.00202585	-0.00650331	0.00763792	-0.0092981	-0.00698586	-0.0332259	0.00564189	-0.0129669	-0.0524368	-0.00871662	-0.0205965
	-80	-0.0395781	0.0116644	-0.0172024	0.00830219	0.00424557	0.0072351	-0.00195665	-0.00713667	0.00714572	-0.011234	-0.0175431	-0.00213587	-0.0129197	0.00660421	0.00779494	-0.0278753	0.00381148	0.00493904	-0.0136504	0.00588866	0.0124594	-0.00546982	-0.0161229	0.000541984	0.0169217	0.0117943	0.0136864	0.0199125	0.00195886	0.0120758	-0.0105797	-0.00664347	-0.0227051	-0.00857555	0.0173394	0.000452694	-0.00276594	0.0143739	-0.0120195	0.02183	-0.00813825	0.033907	-0.0249418	0.0020126	-0.00422331	-0.018137	-0.0114985	-0.0030979
	-60	0.00493517	0.00530944	0.00352712	-0.0126487	-0.0134339	0.00218736	0.00813232	0.027203	-0.0187812	0.0154715	0.0180913	-0.0229325	-0.0235096	-0.0239044	-0.00472248	-0.0129072	-0.00809939	0.0197015	-0.00484368	0.0043563	-0.0172502	-0.00678559	0.000874631	-0.0263637	-0.0338434	-0.0143359	0.00462573	-0.0255706	-0.0200084	0.00433845	0.031353	0.0168334	-0.00898563	0.0052364	-0.0228334	-0.00648861	-0.00575615	0.00135057	-0.00301939	0.0103473	0.0100327	0.0141421	0.00214938	-0.000296942	-0.00108882	0.0338063	-0.0104553	-0.0301883
	-40	-0.00909619	0.0145343	0.0330745	0.000641036	0.0150774	0.0202751	0.0390107	0.0155573	0.0220063	0.000794544	0.00392891	0.00423427	0.0323648	0.00409174	-0.014964	-0.0237303	-0.0196438	-0.0264084	0.00480174	-0.0151266	-0.0116505	0.00374053	-0.00160074	-0.0172661	0.00468047	-0.0194763	-0.0278021	-0.0219319	-0.00979432	-0.0214988	-0.0263045	-0.00697647	-0.00132251	0.00341504	0.00860618	0.00135808	-0.0241958	-0.00564345	-0.00650331	-0.00255457	-0.00272564	0.00289658	-0.0164338	-0.00623577	0.00518015	-0.0032079	-0.0375788	0.00610507
	-20	0.00251597	0.0176093	0.00399121	-0.0148376	-0.0216512	0.0110209	0.0195971	0.000179163	0.0166312	-0.0138825	0.00621317	0.0315884	0.0439632	-0.0081117	-0.0233564	-0.0296024	-0.0143297	-0.0214875	-0.0119729	-0.00527572	-0.00869511	-0.0169358	-0.0124924	-0.00429716	-0.00882088	-0.0179056	-0.00761417	-0.00837798	-0.0205681	-0.0209462	0.00114488	-0.008475	-0.00985082	0.00432572	-0.0202928	0.00392334	-0.000523286	-0.00202585	-0.000696783	-0.00642514	-0.00214571	-0.012779	-0.043525	0.00448712	0.0175531	-0.0196175	-0.0160191	0.0241222
	0	0.0189665	0.0239642	0.0533399	-0.00154787	-0.0313624	-0.0165314	0.00308784	0.000328466	0.00893742	-0.0369463	-0.0104619	0.0265298	-0.0143317	0.00965507	-0.0405678	-0.0180884	0.000513084	-0.0439046	0.00207586	0.00961012	0.00265986	-0.0128005	-0.00325099	-0.0172661	-0.00738074	-0.010195	-0.0290737	-0.0177475	-0.0300826	-0.0673704	0.0219733	-0.0129706	-0.014424	-0.0128254	0.00447775	0.0114682	-0.0251925	0.0179915	0.00423876	0.00802498	0.0220177	0.0185722	-0.015986	0.00300241	-0.00042893	-0.0262801	-0.0338696	-0.0216335
	20	0.00396749	0.0329842	0.0231738	-0.0121797	0.0203065	0.00576284	0.0211257	0.0225746	0.0153665	-0.0323115	-0.0200557	-0.00475887	-0.0176599	-0.00972686	-0.0385764	-0.0492913	-0.0267903	-0.0180247	0.0108826	0.0717804	-0.0408935	0.084754	-0.0207436	-0.0151369	0.10009	-0.0163349	0.104611	-0.0118347	-0.00545684	-0.0528628	-0.0218906	-0.0274563	-0.0281434	-0.000834788	0.00812982	0.0159952	-0.0212056	0.0271561	-0.019568	-0.00565103	-0.0317218	-0.0199353	-0.00120903	0.151638	0.576316	1.59395	0.771838	1.2428
	40	0.00154829	0.0342141	0.0445221	-0.0304726	0.00673564	0.00344929	-0.010517	-0.0650661	0.00999136	-0.0273456	-0.0111472	-0.00738187	-0.0130205	-0.00147159	-0.0247788	-0.0542423	-0.00956534	-0.0353387	-0.00127907	0.777763	-0.0186502	1.66931	0.854052	0.821842	1.07831	0.647057	1.90467	0.411067	0.994963	-0.0664032	0.0175593	-0.0184652	-0.0340762	-0.0138878	-0.0150529	0.0202203	-0.044878	0.0264326	0.0112066	-0.000361253	-0.00987802	-0.00834895	0.0175981	2.52206	2.24485	2.91351	2.48375	2.39032
	60	0.0228372	0.0344191	0.0245661	-0.0206226	-0.0108194	0.00744542	0.0312147	-0.0517782	-0.00202357	-0.0207244	-0.00863447	0.00816877	0.0322639	0.00104088	-0.0314643	-0.0462977	-0.0146962	0.338278	0.0981108	1.74994	-0.0556705	1.99694	1.66168	1.50319	1.80036	1.42482	2.21417	1.12606	2.02295	0.00779264	0.00680028	-0.0357815	-0.0235703	-0.0143432	-0.0106069	0.023691	0.000971817	0.0334266	0.0013355	-0.0155855	-0.00697841	0.0110751	0.53748	2.07862	2.13218	2.21024	2.13172	2.26122
	80	0.0148539	0.0198643	0.0418923	-0.036414	0.0391066	0.0396248	0.0552142	-0.0608857	0.0191606	-0.00494383	-0.011604	0.0420804	0.0334742	0.00014357	-0.0499559	-0.0430738	-0.0152459	1.07822	0.271309	1.86618	-0.00449533	1.79619	1.66251	1.7167	1.87525	1.83063	2.01308	1.58844	2.14943	0.37214	0.00114488	-0.0437736	-0.0445821	-0.0258784	-0.00171488	0.0262562	-0.0359074	0.0573027	-0.00998723	-0.0162306	-0.0203166	-0.000170387	1.3744	2.27114	2.08978	2.43862	2.16059	2.22545
	100	0.0117089	0.0284742	-0.00498128	-0.049391	-0.0175425	0.0158583	0.0538384	-0.0726806	0.0216901	-0.0208347	-0.0143451	0.0216585	0.00906698	-0.000753742	-0.0461153	-0.0578117	-0.00333504	1.23715	0.540962	1.71229	0.142964	1.86235	1.68908	1.80825	1.74977	1.92958	1.86875	1.58844	2.0021	1.07679	0.0103866	-0.0436071	-0.0429753	-0.0163163	-0.0269618	0.00648861	-0.0229498	0.0671908	-0.00824527	0.00105795	-0.0179969	-0.015846	1.87301	2.14313	1.90699	2.10389	1.94476	2.07781
	120	-0.00982195	0.0202743	0.0208533	-0.0371957	-0.0272538	0.0202751	0.0666789	-0.0272925	0.0126262	-0.00814408	0.00438576	0.00741934	-0.0248207	-0.0357489	-0.0300418	-0.0681742	-0.028073	1.40117	0.823405	1.60699	0.448148	1.79562	1.63066	1.6956	1.63222	1.88474	1.84633	1.41342	1.86204	1.26415	-0.0170628	-0.0499342	-0.0381549	-0.0366548	-0.0431579	0.0223329	-0.0286811	0.0970963	0.0254326	0.0182175	0.00558659	0.0318623	2.06556	1.99218	1.76511	2.0232	1.87822	1.90127
	140	0.0475131	0.0389291	0.0216268	-0.0340687	-0.0263823	0.00954865	0.0623987	-0.0480456	0.00408929	-0.0473195	0.00027411	0.0289654	-0.011306	-0.0219303	-0.0495292	-0.0966137	-0.0390677	1.45093	1.10438	1.47543	0.799841	1.67551	1.57141	1.54423	1.59226	1.78907	1.71042	1.3653	1.88457	1.15734	-0.00409672	-0.0522653	-0.028885	0.0044775	-0.0118772	0.0135808	-0.0560913	0.120972	0.0141099	0.0378284	-1.93308e-05	0.0335662	2.13496	1.83447	1.52607	1.91166	1.79685	1.75998
	160	0.0213857	0.0290892	0.0222456	-0.0206226	-0.0308644	0.0328945	0.0640802	-0.0396847	0.0193714	-0.00516454	-0.0166294	0.0383333	-0.00787688	-0.0262374	-0.0513783	-0.0963835	-0.0260573	1.55317	1.28114	1.50476	1.06381	1.56311	1.4488	1.41822	1.51863	1.63429	1.65749	1.32055	1.6975	1.22353	-0.00313116	-0.0374465	-0.065841	-0.0322532	-0.0131474	0.00513053	-0.0266876	0.108431	0.0501103	0.049311	0.0218244	0.0192537	2.11325	1.64129	1.48911	1.7219	1.6544	1.63892
	180	0.0530772	0.0274492	0.0327651	-0.0292218	-0.0204061	0.0305809	0.0729463	-0.0384903	0.0259059	-0.0196208	-0.0173146	0.030839	-0.00747345	-0.025699	-0.026059	-0.0524001	0.000696328	1.46587	1.19601	1.32701	1.23475	1.46311	1.33229	1.34176	1.46157	1.55747	1.58993	1.28161	1.63649	1.3172	-0.0330634	-0.0629215	-0.0785717	-0.0155574	-0.0336308	0.00799759	0.0156737	0.0898611	0.0408199	0.0838881	0.00983936	0.0134606	1.99839	1.50487	1.47228	1.68723	1.59656	1.61766
	200	0.0247726	0.0299092	0.0321463	-0.0615863	0.00100848	0.0131241	0.0747806	-0.0401326	0.00461626	-0.0232625	-0.0154872	0.0458276	-0.00656574	-0.0475934	-0.0436972	-0.0616113	-0.0255076	1.41338	1.15114	1.24338	1.33213	1.43962	1.22767	1.28137	1.33249	1.53948	1.5033	1.18928	1.48594	1.23638	-0.0534781	-0.0496012	-0.0545935	-0.0254231	0.00209597	-0.00331975	0.0154245	0.0903434	0.0602717	0.0745988	0.00809959	0.0393593	1.8645	1.32588	1.44374	1.52893	1.4716	1.55169
	220	0.0581575	0.0350341	0.048699	-0.0343814	-0.00708425	0.0166996	0.0925128	-0.0531219	0.0614237	-0.00648878	-0.0111472	0.0628771	0.0148158	-0.0536951	-0.0296151	-0.0429586	-0.0412666	1.36582	1.19622	1.20661	1.36168	1.42533	1.15588	1.18691	1.27309	1.4628	1.45609	1.11569	1.46621	1.17586	-0.0538919	-0.0537638	-0.0358065	-0.0140396	0.0105116	-0.00845028	-0.00376268	0.0927552	0.0527233	0.0845332	0.0154453	0.0628727	1.78121	1.24075	1.34493	1.45182	1.31883	1.50139
	240	0.0542868	0.0149443	0.0678816	-0.04001	-0.0370896	0.048248	0.0842582	-0.0583475	0.0335996	-0.0376084	-0.0102335	0.0315884	0.00745328	-0.047055	-0.0463998	-0.0104892	-0.0321044	1.34905	1.27947	1.22062	1.3329	1.33492	1.07172	1.17045	1.22718	1.42268	1.44973	1.07166	1.35763	1.12211	-0.0438225	-0.0419421	-0.00836763	-0.0157092	0.0128934	-0.0169006	0.017418	0.11229	0.0628847	0.0637612	-0.0243761	0.0754813	1.65471	1.16899	1.2791	1.48452	1.23815	1.3233
	260	0.053803	0.0258092	0.0406547	-0.0379775	-0.0562632	0.0532958	0.0617873	-0.0337126	0.0252735	-0.0489748	-0.0138883	0.0493873	0.0179423	-0.023366	-0.0250633	-0.0385833	-0.0187276	1.29929	1.29268	1.19303	1.35452	1.27702	1.0501	1.14006	1.15626	1.36285	1.39934	1.07521	1.37065	1.12515	-0.0694787	-0.06442	-0.00379448	-0.0205661	0.0402045	-0.0224838	0.001221	0.136166	0.101208	0.0654384	0.0287835	0.0778668	1.49866	1.14573	1.17632	1.3467	1.13117	1.20975
	280	0.035659	0.0188393	0.0446768	-0.0189027	-0.0296194	0.0535061	0.0897612	-0.0484935	0.0361291	-0.0154274	-0.02234	0.0887323	-0.00172464	-0.0639245	-0.00102415	-0.0667926	-0.029539	1.28635	1.24445	1.12824	1.27037	1.28154	1.08228	1.13019	1.07813	1.31259	1.25961	1.06639	1.3186	1.14118	-0.0810654	-0.0439401	-0.013188	-0.00781665	0.0349646	-0.0245963	-2.49184e-05	0.103849	0.0550459	0.0797595	0.0115791	0.105129	1.39611	1.01887	1.11182	1.30056	0.999954	1.14792
	300	0.0291272	0.0405691	0.0224003	-0.00139152	-0.0491664	0.0831616	0.0782965	-0.0489414	0.0412934	-0.000750403	-0.0052081	0.0729943	-0.00323749	-0.0551308	-0.0273392	-0.0179733	-0.0467639	1.24134	1.2283	1.10635	1.243	1.20729	1.0166	1.08896	1.04644	1.23791	1.1884	0.996343	1.29089	1.05151	-0.0613405	-0.0284554	-0.030739	-0.00994156	0.0508432	-0.0218802	0.00396202	0.135202	0.0922076	0.0989833	-0.0108446	0.0833191	1.34014	0.959319	1.03494	1.27662	0.980249	1.21455
	320	0.0320302	0.0335991	0.0340027	0.00423709	-0.0419452	0.0427796	0.128283	-0.0304279	0.0647963	-0.0394844	-0.0296496	0.0810507	0.0531412	-0.0626682	-0.0109812	-0.00668962	-0.0163454	1.21728	1.19727	1.06169	1.19789	1.23962	1.06116	1.04948	1.02826	1.18351	1.09684	0.940399	1.20638	1.01572	-0.0933418	-0.0354485	0.00930698	-0.00842377	0.0311537	-0.0264071	0.0191622	0.129896	0.10353	0.0974351	0.0338095	0.116374	1.26782	0.889373	1.01283	1.30771	0.911744	1.21506
	340	0.0593671	0.046924	0.0533399	-0.000922466	-0.0301174	0.0953603	0.0981687	-0.021619	0.0403448	-0.0165309	-0.0259948	0.0881703	0.0085627	-0.0427479	0.0156183	-0.0291419	-0.0405336	1.27651	1.19874	1.04264	1.1702	1.20203	1.01842	1.03573	0.939874	1.12168	0.997806	0.911563	1.13194	1.05621	-0.0807896	-0.0619224	-0.0265366	-0.0107005	0.043539	-0.0261053	0.0194114	0.133272	0.109337	0.0713733	0.03033	0.0949054	1.21252	0.890528	0.958064	1.32795	0.869204	1.16931
	360	0.0465454	0.0292942	0.0259584	0.00439344	-0.0570102	0.0495099	0.0787551	-0.0368479	0.0425581	-0.0218279	-0.0294212	0.10166	0.042753	-0.028032	0.027709	-0.0192398	-0.021293	1.21072	1.16645	1.00105	1.12742	1.06913	1.01429	0.965661	0.939514	1.06443	1.01577	0.837516	1.14985	0.954101	-0.0898934	-0.0331174	0.00337425	-0.0120665	0.0475087	-0.0469292	0.0186639	0.132066	0.0983045	0.0864685	0.0301367	0.11876	1.21386	0.844502	0.952125	1.19506	0.828287	1.09244
	380	0.0487227	0.00305447	0.0443674	0.00658234	-0.0388327	0.0762209	0.102602	-0.0495387	0.0640585	-0.024035	-0.0216547	0.0902312	0.0403324	-0.0510032	0.0599983	-0.00242945	-0.0260573	1.23496	1.14464	0.942383	1.14345	1.07628	1.00224	0.971856	0.980738	0.980181	0.97285	0.852617	1.08423	0.978695	-0.108101	-0.01014	-0.00441247	-0.00174547	0.0610054	-0.0389316	0.017418	0.11422	0.121821	0.0766631	0.0243374	0.130346	1.21162	0.790887	0.894384	1.28945	0.7264	1.13016
	400	0.0494484	0.0286792	0.0678816	0.00486249	-0.0496645	0.0762209	0.126296	-0.025053	0.0638477	-0.0328632	-0.0122893	0.0729943	0.0314571	-0.0215714	0.0705243	-0.0385833	-0.0332038	1.25209	1.11717	0.923557	1.14749	1.11575	0.995478	0.929077	0.877408	0.978182	0.897185	0.808498	1.01679	0.918868	-0.111687	-0.0209627	-0.0465596	-0.0044775	0.0632284	-0.028067	0.0166704	0.134478	0.11166	0.0907261	0.0183449	0.108877	1.21252	0.805899	0.906097	1.12424	0.71052	1.07261
	420	0.0632379	0.0305242	0.0381795	0.0114292	-0.0792963	0.0663358	0.079978	-0.00116456	0.0541515	-0.0218279	-0.0303349	0.1144	0.0669585	-0.035031	0.0654035	0.0310762	-0.045298	1.21801	1.07188	0.837963	1.06349	1.02496	0.962638	0.856684	0.878848	0.924351	0.831693	0.733087	0.956485	0.914999	-0.115825	-0.0181322	0.0121498	-0.0226911	0.0625933	-0.0439113	-0.00176921	0.147984	0.0959819	0.0649223	0.0225977	0.118078	1.1805	0.771256	0.836149	1.0818	0.707506	1.12381
	440	0.053803	0.0342141	0.0703567	0.0101784	-0.068589	0.0747487	0.0914427	-0.0389382	0.0623722	-0.0370567	-0.0392435	0.10166	0.0531412	-0.03539	0.0634121	0.00966022	-0.035586	1.19997	1.06894	0.852849	1.04047	0.96876	0.955872	0.879137	0.835464	0.947911	0.827243	0.739728	0.941794	0.874793	-0.0903072	-0.0174662	-0.0220871	-0.0342263	0.0659278	-0.0259544	0.0109392	0.13279	0.16566	0.0954998	0.00925944	0.146021	1.19909	0.764987	0.779233	1.11437	0.690583	1.06911
	460	0.0750919	0.0374941	0.0590638	0.0159634	-0.0617413	0.0715938	0.123238	-0.00698737	0.0808162	0.00432585	-0.0125177	0.102035	0.0515275	-0.013675	0.0516059	0.00424866	-0.0507953	1.18411	1.01296	0.828988	1.04047	1.00748	0.939865	0.801711	0.79946	0.784419	0.758572	0.670048	0.834616	0.89082	-0.0943074	-0.0202967	0.00114947	-0.0173788	0.072438	-0.0238419	0.0204082	0.161731	0.14795	0.110337	0.0573931	0.134435	1.21924	0.719291	0.787482	0.995805	0.588696	1.10567
	480	0.0400135	0.0346241	0.0972742	0.0101784	-0.0450578	0.0520338	0.15748	-0.0375944	0.0777597	-0.00670948	-0.0079492	0.0932289	0.0989299	0.00983454	0.0830417	0.0181806	-0.0223924	1.16279	1.01275	0.840371	1.0047	0.907483	0.933099	0.782161	0.786319	0.777422	0.817228	0.598821	0.872954	0.849508	-0.0777549	-0.03728	-0.0227051	-0.0331638	0.0781543	-0.0341029	0.0216541	0.140749	0.136047	0.10337	0.0423151	0.161016	1.16729	0.719621	0.800515	0.963109	0.577337	1.07624
	500	0.0704955	0.0313442	0.0220909	0.000797386	-0.0426923	0.0848442	0.0945	-0.0435665	0.0720685	0.0355558	0.00392891	0.129201	0.0826921	0.00373282	0.0766408	0.00712715	-0.035586	1.21345	0.995135	0.803157	0.981054	0.889438	0.901579	0.776354	0.768317	0.771283	0.706115	0.621108	0.759759	0.793689	-0.0813413	-0.0309529	0.0426786	-0.0226911	0.0830766	-0.0188622	0.00396202	0.164384	0.122692	0.108531	0.0446347	0.179758	1.18744	0.659408	0.697572	0.966811	0.593912	0.987842
	520	0.0639636	0.045284	0.078401	0.00970934	-0.0618658	0.0604467	0.129811	-0.0180358	0.0870344	0.0116092	-0.00429439	0.114962	0.0959042	-0.0226481	0.123297	-0.00853185	-0.0566591	1.14001	0.973748	0.755216	0.93999	0.871957	0.900094	0.685572	0.775338	0.72145	0.66558	0.579536	0.714985	0.813723	-0.0966523	-0.0276228	0.0075766	-0.0292176	0.0741846	-0.0202203	0.0268869	0.145813	0.149112	0.106466	0.0599061	0.174646	1.12453	0.67508	0.67728	0.781493	0.537927	1.01325
	540	0.0763015	0.0299092	0.0816497	0.0250317	-0.066846	0.0638119	0.110703	-0.0187823	0.0846104	0.0165751	-0.0168578	0.119084	0.071497	-0.0111626	0.112628	0.0118479	-0.0456644	1.13855	0.988425	0.787833	0.917435	0.803725	0.901909	0.685572	0.724032	0.722735	0.623297	0.558614	0.666294	0.787056	-0.0872726	-0.0219617	-0.00243489	-0.0188966	0.0783131	-0.00769579	0.0333657	0.106984	0.122402	0.110208	0.0432816	0.155222	1.13326	0.629549	0.655009	0.804935	0.539897	1.02582
	560	0.0971066	0.044464	0.0866	0.00861489	-0.0485439	0.05603	0.137302	-0.00668876	0.133829	-0.0201726	-0.0170862	0.171357	0.100039	-0.00559923	0.127706	0.0166837	-0.066371	1.09153	0.937263	0.748429	0.873104	0.825906	0.80933	0.676861	0.70441	0.722306	0.614713	0.517043	0.635511	0.763015	-0.0545816	-0.0206297	0.0128913	-0.00493284	0.0852996	-0.01177	0.0306247	0.133513	0.126176	0.0954998	0.0660919	0.164082	1.04818	0.542941	0.663752	0.729673	0.502689	0.946104
	580	0.0852526	0.046924	0.0754618	0.0223737	-0.0558896	0.067808	0.166499	-0.047747	0.0756519	-0.0146549	-0.0097766	0.134635	0.119202	-0.00703492	0.100964	0.00401838	-0.0344865	1.11467	0.944602	0.748429	0.81804	0.731922	0.776161	0.698928	0.680828	0.720736	0.575927	0.48857	0.619141	0.752376	-0.0609267	-0.00614396	0.00349784	-0.0404493	0.0737083	-0.00558322	0.0331165	0.125314	0.131692	0.0542138	0.0608726	0.170216	1.05647	0.510772	0.613105	0.709685	0.518221	0.979676
	600	0.106542	0.048974	0.103617	0.0239372	-0.0469254	0.0697009	0.153199	0.00122428	0.098944	0.000684191	-0.0248527	0.172294	0.086222	-0.00218944	0.129555	0.0329184	-0.0401671	1.07002	0.8861	0.750837	0.819907	0.732862	0.800419	0.650149	0.657786	0.705315	0.500262	0.429169	0.573807	0.726263	-0.0734789	0.017666	0.00473383	0.0029597	0.0775191	-0.010412	0.0164212	0.143402	0.131982	0.0671157	0.0338095	0.179077	1.01214	0.487842	0.58737	0.652313	0.474638	0.948567
	620	0.0738823	0.0571739	0.0864453	-0.00514392	-0.101956	0.0983048	0.188205	-0.00280689	0.109273	0.00322232	-0.0234821	0.182598	0.123337	-0.00936793	0.134961	0.0196774	-0.0451147	1.10283	0.876874	0.711434	0.837639	0.671397	0.812301	0.618211	0.662286	0.65848	0.478008	0.434445	0.547782	0.712999	-0.0260287	-0.00214789	0.00498103	-0.00963801	0.0617994	-0.0153916	0.0171688	0.123143	0.134015	0.0960159	0.0469544	0.17635	0.936683	0.465901	0.55586	0.638742	0.483911	0.870018
	640	0.0922682	0.0711138	0.0872188	0.0328492	-0.0657254	0.0848442	0.127824	-0.00624086	0.0942012	-0.000750403	-0.00589337	0.167235	0.105486	-0.00829116	0.122585	0.0123084	-0.0354028	1.07786	0.873309	0.698518	0.795953	0.652413	0.763124	0.6426	0.605581	0.657338	0.450349	0.431352	0.539247	0.703742	-0.0286495	-0.000149853	-0.00552486	0.00189725	0.0745022	-0.00588502	0.0141786	0.117837	0.116885	0.108015	0.052947	0.162379	0.925488	0.404203	0.550251	0.713263	0.431751	0.86574
	660	0.107751	0.0625038	0.0561245	0.0237809	-0.086393	0.0587641	0.186982	-0.0104213	0.0951498	-0.0194001	-0.0143451	0.162551	0.112041	-0.006676	0.125146	0.00781799	-0.0658213	1.04177	0.819421	0.689105	0.77542	0.647149	0.785072	0.606016	0.565257	0.605934	0.436043	0.447908	0.546663	0.681635	-0.0207871	0.0105063	0.0210489	-0.00113835	0.112928	-0.0134299	0.00720142	0.138337	0.157241	0.096532	0.0583596	0.168172	0.92101	0.387212	0.52534	0.72992	0.454817	0.783821
	680	0.0985582	0.0795187	0.111971	0.0303476	-0.0943612	0.0934674	0.189428	-0.0180358	0.0846104	-0.0166413	-0.0097766	0.211826	0.10599	-0.0108036	0.165116	0.0256646	-0.052078	1.00222	0.823824	0.702896	0.775576	0.601098	0.760483	0.588982	0.581278	0.583374	0.393282	0.377228	0.469288	0.704571	-0.0176145	0.00617726	-0.0210983	-0.00402216	0.0935565	-0.0119209	0.00346366	0.152084	0.140982	0.110724	0.0587462	0.185551	0.866604	0.371045	0.502244	0.663171	0.407525	0.81804
	700	0.128072	0.0536889	0.111506	0.0303476	-0.086891	0.074959	0.189581	-0.0156469	0.0865075	-0.029994	-0.00246699	0.180912	0.0653448	0.000323032	0.142357	0.0224407	-0.0526277	1.02956	0.803904	0.643572	0.755977	0.574219	0.697279	0.521234	0.545095	0.568095	0.350522	0.327742	0.473905	0.67597	0.0167317	0.0111723	0.0109138	0.00341504	0.110229	-0.00316885	0.0525529	0.140749	0.149692	0.0917583	0.05546	0.201908	0.85026	0.362961	0.520556	0.692412	0.409611	0.816355
	720	0.120331	0.0413891	0.118623	0.0170578	-0.101333	0.094519	0.233911	0.000925677	0.0921987	-0.0267938	-0.0143451	0.213887	0.074321	-0.0147518	0.165401	0.0258949	-0.0573921	1.02537	0.775387	0.659552	0.719423	0.546587	0.683912	0.580078	0.493429	0.549248	0.348456	0.346208	0.404226	0.618492	0.0302495	0.00900781	0.0140037	0.000683008	0.103084	0.0289724	0.0116867	0.135443	0.159273	0.110208	0.0494674	0.222014	0.82899	0.338711	0.487066	0.596052	0.354437	0.696976
	G - maximal amplitude of cytosolic calcium represented as normalized fluorescence intensity changes (ΔF:F) - ent3nsh3
	control	50 µM Ado	200 µM Ado	10 µM ATP	10 µM Ado + 10 µM ATP	50 µM Ado + 10 µM ATP	200 µM Ado + 10 µM ATP
	0.128072	0.00438576	0.0302495	1.55317	1.49835	0.816175	2.13496
	0.0795187	0.213887	0.017666	1.29268	1.30757	2.9607	2.52206
	0.118623	0.123337	0.0426786	1.86618	0.970582	1.71325	2.24485
	0.0328492	0.00983454	0.0044775	1.36168	2.30832	1.68877	2.91351
	0.0391066	0.165401	0.112928	1.99694	1.54644	1.39703	2.48375
	0.0983048	0.0329184	0.0289724	1.68908	2.00099	2.12065	2.39032
	0.233911	0.000696328	0.0525529	1.80825	2.17674	2.2011	1.61188
	0.0225746		0.164384	1.87525	3.0183	1.6038	1.92539
	0.133829		0.16566	1.92958	1.94717	1.60388	1.18384
	0.0355558		0.110724	2.21417	1.54971	1.78295	1.69525
			0.0660919	1.58844	1.3782	2.21353	1.98024
			0.222014	2.14943	2.17297		1.44012
				1.3172	1.1908		1.32123
	H, I - cytosolic calcium represented as normalized fluorescence intensity changes (ΔF:F) - dorn1
	time [sec]	control				50 µM Ado						10 µM ATP							10 µM ATP + 50 µM Ado				200 µM Ado					200 µM Ado + 10 µM ATP
	-180	-0.014527	0.0250725	-0.0317004	-0.0147275	-0.00399754	0.0230773	0.0398591	0.00157131	-0.0199355	0.0070292	-0.077833	-0.107616	-0.0855374	-0.00348276	-0.00555151	-0.0211352	-0.050759	-0.024663	-0.0142463	0.0254307	-0.0114753	0.025957	-0.0279413	0.00790986	0.0124083	-0.0344658	0.00427203	0.0658561	-0.135453	-0.0542645
	-160	-0.0213255	0.00394084	0.0148208	0.0151879	-0.0200037	-0.0077571	0.0106001	-0.00673319	-0.0371476	0.0335491	-0.0823537	-0.056451	-0.0548572	-0.0146967	-0.00889544	-0.00651394	-0.0505376	-0.0148756	-0.0462082	-0.0206721	-0.0186566	-0.00271341	0.00707037	0.00144958	0.0265163	-0.0595977	0.0379155	-0.00904444	0.0399725	0.0660246
	-140	0.0192153	0.0150127	-0.0113828	-0.0384985	-0.0157824	0.0304567	-0.00252768	-0.00883516	-0.0252315	-0.0725248	-0.0477638	-0.0751327	0.00666435	-0.0339021	-0.0183354	0.000938674	-0.0134297	-0.00447837	0.012962	0.021076	-0.0216663	0.0288012	-0.0508114	-0.00986033	-0.00405107	-0.0324168	-0.0334659	0.0337079	-0.148075	0.0473336
	-120	0.0315909	-0.0158616	0.0267158	-0.0111054	-0.00170714	-0.0143397	0.0106676	-0.00452785	0.00209331	-0.0136161	-0.0325322	-0.0196473	0.0334137	0.00164729	-0.0282488	-0.0311253	-0.0109093	0.0187267	0.0176739	0.000848846	-0.00649898	-0.034388	0.0186886	-0.0236305	0.00507529	0.0127398	0.0301459	0.0515471	0.0903536	0.00403312
	-100	0.0324297	-0.00333967	0.0198447	0.0266115	0.0143389	-0.00723741	-0.00731981	0.0116332	0.0100602	-0.0246506	-0.000587129	-0.0065456	-0.0622275	0.0217034	-0.0396714	-0.00221981	-0.0232729	0.00728388	-0.0141838	-0.0227547	0.013585	-0.0339197	0.0310919	0.0193968	0.00156822	0.0120568	0.0114743	0.0499766	0.146292	-0.0260719
	-80	-0.031435	-0.0135505	0.0389556	0.0178129	0.0263236	0.0349606	-0.02173	0.0164574	0.0221817	0.0195323	0.0688178	0.0272319	0.0703793	0.0225541	0.0248398	0.0170683	0.0364506	0.0122211	0.0137751	0.000154622	0.0126016	-0.0489974	0.00903291	0.0188127	-0.0153494	-0.00445977	0.0083418	-0.0631661	0.214456	-0.0300174
	-60	-0.0430601	0.0185472	0.0122841	-0.0205639	-0.00773941	-0.00696025	-0.0257122	-0.00187454	0.0199218	0.0382813	0.020647	0.0270395	-0.0187446	0.00324559	-0.00226677	0.0268986	0.0262668	0.00763239	-0.0264014	-0.00858628	-0.0110879	-0.031915	-0.00831593	0.0211844	-0.0144727	0.020967	-0.0163728	0.00679474	-0.0115827	0.00977028
	-40	0.00878213	-0.0148797	0.00179287	0.019162	-0.000521997	-0.0184625	0.00921642	-0.0167606	0.0092384	-0.000758514	0.051823	0.0464559	0.0704501	0.000977028	0.039192	-0.00010824	0.0350201	-0.0173442	0.0179033	-0.00246449	-0.00119491	0.0255515	-0.00480953	0.0145471	0.00969825	0.0287285	-0.0411368	-0.0510317	-0.0659602	-0.00259984
	-20	0.058108	0.0264319	-0.0284003	0.0220655	0.000103867	-0.0218578	-0.000367847	-0.0113506	-0.00176459	0.015177	0.0128062	0.0905363	0.0177965	0.0172694	0.0376236	0.0123128	0.0202212	0.0309245	0.0296623	0.00608707	0.0325366	-0.0220917	0.0333422	-0.0407989	-0.0189761	0.046906	-0.00258492	-0.00174231	-0.0582456	0.0025938
	0	-0.0397786	-0.0413736	-0.0429305	-0.0159446	0.00898581	-0.0118799	-0.0126857	0.0204201	0.0205838	-0.00201895	0.0869757	0.0741286	0.0226629	-0.0153154	0.0013139	0.00388423	0.03095	-0.0154274	0.00906318	0.000880401	0.0118567	0.0937153	-0.00734775	-0.00901076	-0.00241709	0.00954202	0.00141085	-0.082898	-0.0717567	-0.0168018
	20	0.00988578	-0.0166017	-0.0224158	-0.00240936	-0.0328006	-0.0259113	-0.0136643	0.0193519	0.0279572	0.0169101	0.0232357	0.155468	-0.0285285	0.0216519	0.0213775	0.0214688	0.0677684	-0.002184	-0.0134332	-0.0241432	0.0156709	0.144414	-0.0197248	0.0323881	0.013026	0.04183	-0.0367957	-0.00928606	0.156157	0.0334939
	40	0.0488226	0.0176409	-0.0306168	-0.0188775	-0.00570202	-0.0212341	0.00324313	0.0388899	0.0502827	0.030353	0.0467583	0.0832071	0.0640664	0.0274522	0.0475074	0.0849935	0.0637834	0.0634813	0.015318	-0.0159387	0.0235376	0.102768	-0.0240947	0.0190251	0.0234675	0.0544037	-0.0371657	0.000579875	-0.0192548	0.0134843
	60	-0.00232797	-0.0314346	-0.0225882	-0.00623677	0.0018483	-0.0489158	-0.0177478	-0.010248	0.0405809	-0.016227	0.0168579	0.0738313	0.0577967	-0.00616378	0.0424472	0.0471094	0.0656567	5.22766e-05	-0.0449781	-0.0349668	0.0246103	0.113739	-0.01771	0.00723728	0.0234077	0.0321436	-0.0333425	0.0118284	-0.0626159	0.0726173
	80	-0.0725791	-0.00853572	-0.0261592	0.0480069	0.0216096	-0.0426103	-0.0416072	-0.0329217	0.00709259	-0.0266144	0.0915339	0.0994224	0.0579303	0.00167306	0.0993235	0.0364983	0.0674618	-0.00465262	-0.0407874	-0.0108583	0.0176971	0.153969	-0.000727448	0.0199985	0.0175692	0.062398	-0.0202946	-0.0279978	-0.0746392	0.100005
	100	-0.019751	-0.00602833	-0.0397782	0.0131496	-0.00386438	-0.0340876	-0.0459944	-0.0198619	-0.00260921	-0.0109546	0.0426503	0.174429	0.0612362	0.0158	0.0832845	0.0334462	0.0482693	-0.0116228	-0.0432268	-0.0121521	0.0119461	0.0944063	0.0155224	-0.041029	0.00344131	0.061389	-0.0217745	-0.0641326	-0.106225	0.0244554
	120	-0.0414855	-0.0068742	-0.0437432	0.040704	-0.00186694	-0.0321821	-0.030673	-0.015589	0.00499243	-0.0789058	0.0647473	0.0959065	0.0771286	0.0149493	0.076715	0.0389115	0.0900093	-0.0141786	-0.000485788	-0.0559197	0.0260406	0.0834008	-0.0539777	0.00185667	0.0204586	0.0429632	-0.0113164	-0.00317857	-0.07168	0.0168562
	140	-0.0215462	-0.0180366	-0.0648242	0.0424637	-0.0120805	-0.0412245	-0.0195701	-0.0205855	0.00818832	-0.0515925	0.0899582	0.141596	0.0499468	0.022683	0.0518279	0.0681719	0.051522	-0.0302972	-0.00288346	-0.038501	0.0181441	-0.0170429	-0.0404231	0.00874173	0.0526599	0.0687625	-0.0285328	-0.0298636	-0.187644	-0.00201606
	160	-0.0053299	-0.0323711	-0.0672131	-3.37281e-05	0.0192793	-0.0339143	-0.0103233	-0.0291657	-0.00573662	-0.0608882	0.0798664	0.142541	0.0349035	-0.000672835	0.0471819	0.0180087	0.0708508	-0.0477809	-0.00432205	-0.0297285	0.00124854	0.000679067	-0.043851	0.000369917	0.0320558	0.0325161	-0.0438253	-0.018803	0.141475	-0.0697246
	180	-0.0446641	-0.00175367	-0.109523	-0.00406644	0.0357115	-0.0607991	-0.00181899	-0.0175532	-0.0176527	-0.0823213	0.0814983	0.175269	0.0542314	0.0154649	0.0113161	0.00903008	0.0783269	-0.0262022	-0.025359	-0.0473365	-0.0061712	0.00919454	-0.0486919	0.00210446	0.0491727	0.0574617	-0.0515455	-0.0267628	-0.00233369	0.0172185
	200	-0.0628375	-0.020106	-0.0866194	0.0394722	0.00178171	-0.030138	0.0139748	-0.0100412	-0.026624	-0.0733294	0.149815	0.147369	0.0735358	0.00734447	0.052331	0.0520955	0.063562	-0.0426113	0.0372931	-0.0473681	-0.0103131	-0.0185107	-0.0471219	-0.00601957	0.0445697	0.0402622	-0.0446146	-0.0475014	-0.0480321	-0.0447931
	220	-0.00734591	-0.0521433	-0.0888605	-0.030609	-0.0141845	-0.00179809	0.0155609	0.0207992	0.0157671	-0.0986226	0.119033	0.186184	0.049766	0.00510169	0.0148376	0.0655102	0.104178	-0.024721	0.000410731	-0.0256579	0.00783394	0.0174416	-0.0661978	0.0139631	0.0411822	0.0367695	-0.05527	-0.00425242	-0.0224113	-0.0290008
	240	-0.0188092	-0.0185502	-0.0802656	-0.00315725	-0.0100165	0.0168065	0.00432304	0.0237281	-0.0139774	-0.0351618	0.101701	0.140879	0.0577377	0.0253125	0.0804141	0.0167666	0.100806	-0.0300358	0.0444652	-0.0254685	-0.0143061	-0.016449	-0.0340644	0.0242641	0.0685214	0.02907	-0.0540614	0.00588197	0.116739	0.00272465
	260	-0.023577	-0.0445003	-0.0906337	0.0368473	0.000676466	-0.0403237	0.0132999	0.0193174	0.0235971	-0.0824451	0.130982	0.166715	0.105847	-0.0112938	0.0673935	0.0414667	0.120612	-0.03355	0.00610258	-0.0598326	-0.00477069	0.0156597	-0.035085	-0.0286748	0.0848014	0.0255773	-0.0762601	-0.0218366	0.115941	-0.0355835
	280	-0.0305962	-0.0482765	-0.0927517	0.00627197	0.00186161	-0.0533157	0.0263939	0.0272084	0.0362208	-0.0234858	0.127737	0.195262	0.0955052	-0.0147224	0.0313501	0.0279633	0.0756702	-0.0464739	0.0365842	-0.0325054	-0.0175541	0.0392757	-0.0669566	-0.0139489	0.104967	0.0121033	-0.0329232	-0.0397966	-0.119779	-0.0181606
	300	-0.0243274	-0.0371895	-0.10605	0.0595038	0.0119553	-0.0272624	0.0127936	0.0374082	-0.0172646	-0.0913245	0.126837	0.14527	0.117946	0.0102833	0.0627475	-0.00158102	0.112114	-0.0527471	0.0276399	-0.000918268	0.00756576	-0.00713963	-0.0496601	-0.02048	0.050189	0.0213706	-0.0527788	-0.0466021	0.0819801	0.0048786
	320	0.00538288	-0.074876	-0.122797	0.0244852	-0.0315755	-0.0361316	0.0367881	0.00753263	-0.0249348	-0.0618223	0.111005	0.150097	0.0702771	0.0234564	0.0256683	0.0310863	0.0928362	-0.0156017	-0.0311968	0.00854841	-0.0303971	-0.0129937	-0.0489797	-0.00720542	0.0863557	0.0228453	-0.0693539	-0.0557298	0.0172439	0.00733451
	340	0.0211872	-0.026873	-0.073764	0.047567	-0.0324277	-0.0408434	0.0468448	0.0278632	-0.00454957	-0.0659412	0.192565	0.139147	0.104955	0.0114433	0.0486911	0.0253548	0.103906	0.0110304	0.000494128	0.0219911	-0.0174349	-0.0171115	-0.0588971	-0.00849748	0.0757548	0.0291942	-0.0409148	0.0236675	-0.0428411	-0.0208984
	360	-0.0399699	-0.0498021	-0.117034	0.088686	0.015564	-0.046941	0.0441112	0.0121845	0.0159954	-0.108205	0.170806	0.193373	0.127023	-0.0154443	0.0639903	0.0208478	0.0853091	0.0164033	0.0405664	0.0347396	0.00577787	-0.0131022	-0.0480116	-0.00375404	0.0956215	0.0189024	-0.0567992	0.0051974	-0.0579716	-0.0681444
	380	-0.0401023	-0.0421288	-0.147227	0.0201445	0.0103174	-0.00803426	0.0416814	0.0132872	-0.00573662	-0.0713431	0.113031	0.113626	0.103261	-0.0203423	0.0636056	0.0323106	0.102935	0.0181458	-0.00523942	0.0282707	-0.0168687	-0.0382202	-0.0671398	0.0158038	0.0868339	-0.00163458	-0.0760382	-0.0205211	-0.0775533	-0.0374556
	400	-0.00460885	-0.0536085	-0.134003	0.0135015	-0.0188585	-0.0233821	0.0218042	0.00701575	0.0222731	-0.070606	0.189039	0.139095	0.143717	-0.00959241	0.0761824	0.00212754	0.105592	0.057818	-0.0560074	0.011988	-0.0317976	-0.0527097	-0.0750423	-0.00316996	0.0704145	0.0257791	-0.0599071	-0.0239843	-0.145484	-0.0650946
	420	-0.0162634	-0.0501041	-0.151069	-0.000532318	0.0024209	-0.045278	0.0288237	0.00929002	-0.0304134	-0.0222648	0.118827	0.199758	0.016633	-0.0371503	0.0210224	-0.0444868	0.134542	0.0732396	-0.0208555	0.00192174	-0.0144551	-0.0501682	-0.0517273	0.000971697	0.117063	-0.00368362	-0.0680219	-0.0693273	-0.0591169	-0.0370228
	440	-0.0365559	-0.0538652	-0.140553	0.0296764	0.00308671	-0.0255648	0.0350332	0.0180425	-0.0436307	-0.096355	0.1579	0.162115	0.0576591	-0.0170683	0.0502595	0.00848001	0.122553	0.0465204	-0.0182911	0.0285547	-0.0320658	-0.0512819	-0.0464677	0.0150604	0.125551	0.0149285	-0.0329972	-0.0336354	-0.0745351	-0.0324431
	460	0.00135087	-0.0322956	-0.140504	0.00619865	-0.0224805	-0.045763	0.0212305	0.0182148	-0.0267838	-0.0585587	0.140924	0.166085	0.0392471	-0.0248279	0.0687547	0.0183991	0.111314	0.0158224	-0.00980541	-0.00180182	-0.0340027	-0.0282256	-0.0597606	0.0194676	0.151376	-0.0386881	-0.0406928	-0.0104807	-0.129121	-0.0539927
	480	0.0147566	-0.0199701	-0.143164	0.0405867	0.00962499	0.000800308	0.0203193	0.0260369	-0.0487898	-0.0740384	0.133552	0.215938	0.0476591	-0.0446004	0.0262306	0.0314411	0.110598	0.019656	-0.0137876	0.0215809	-0.0425548	-0.0947616	-0.0762983	0.0583531	0.126946	0.00598724	-0.0508056	-0.0214607	0.0200744	-0.0391466
	500	-0.0655157	-0.0872771	-0.161733	0.0307615	-0.000881536	-0.0239365	0.0561928	0.0161473	0.0266332	-0.0784669	0.14325	0.21788	0.0247816	-0.0450902	0.0312317	0.0276261	0.113868	0.0438775	-0.0088255	0.0149226	-0.011952	-0.109839	-0.070149	0.0161047	0.137069	-0.0205572	-0.0922186	-0.0299038	-0.00493125	-0.000687453
	520	-0.0241214	-0.0699519	-0.141736	0.0572015	0.00199477	-0.0109445	0.0378342	0.0158027	-0.0392478	-0.0828559	0.15443	0.231611	0.0760908	-0.0646308	0.018655	-0.00795122	0.0951864	0.058544	0.0190083	-3.15556e-06	-0.0287284	-0.0903868	-0.063267	0.049822	0.143824	-0.0212402	-0.060943	-0.0272998	-0.0945867	-0.0201535
	540	-0.0366883	-0.088561	-0.117453	0.00788505	-0.0232528	-0.0329096	0.0165734	-0.0313021	-0.0494518	-0.112797	0.144638	0.246812	0.0633274	-0.053984	-0.0356469	0.0072379	0.110513	0.0330737	-0.0233366	-0.00656672	-0.00328078	-0.0618248	-0.101785	0.0201224	0.111782	-0.0112123	-0.0646428	-0.0513807	0.146874	-0.0927538
	560	0.00829652	-0.0709639	-0.0919636	0.0902111	-0.0349312	-0.0179428	0.033987	-0.0152789	-0.0213736	-0.0829347	0.18146	0.14492	0.153312	-0.0423834	0.00968851	-0.0108435	0.117206	0.0167227	-0.0295914	-0.0308645	-0.0149617	-0.0938249	-0.0547889	0.0479105	0.118756	-0.0107466	-0.115207	-0.00564841	0.0330758	-0.0125644
	580	-0.0291541	-0.0784861	-0.148483	-0.020168	-0.0424016	-0.0281286	0.0138398	-0.0232733	-0.0373759	-0.068057	0.176208	0.226888	0.20856	-0.051071	0.0205489	-0.0267247	0.116542	0.0489309	-0.0297165	-0.00940672	-0.0184481	-0.0867716	-0.0703583	0.0208481	0.0953027	-0.0335189	-0.0894314	0.0044994	-0.15256	-0.0771024
	600	-0.0441932	-0.131428	-0.187001	0.0318614	-0.0289256	-0.0442387	0.0130636	-0.0274428	-0.0443612	-0.0938397	0.233927	0.224212	0.0754422	-0.0813614	0.0141865	-0.00220207	0.144385	0.0813134	0.0343117	-0.0214294	-0.0215471	-0.0824196	-0.0702537	0.0325828	0.116166	-0.00706765	-0.0832898	-0.0219708	-0.0304492	-0.0403342
	620	-0.0699009	-0.0820508	-0.145331	-0.0115453	-0.00415733	-0.0341915	0.00709033	-0.00576836	0.000426879	-0.11852	0.274913	0.169934	0.0390741	-0.0521537	0.00672928	-0.0533589	0.116967	0.0606061	0.0297457	-0.036229	0.00884708	-0.0755375	-0.0936471	0.0106179	0.14494	-0.0319666	-0.0874582	-0.0383335	-0.0235197	-0.0624676
	640	-0.0209135	-0.0880172	-0.188626	0.058184	-0.0407637	-0.0305884	-0.00593617	-0.02603	-0.0277882	-0.0921066	0.28448	0.234393	-0.00317848	-0.0669251	-0.0105822	-0.0812884	0.0945563	0.0410604	0.0111064	-0.0354401	-0.0331981	-0.0683985	-0.0974414	0.0836633	0.108514	-0.0386105	-0.0813905	0.0476276	0.0319949	-0.0772232
	660	-0.0660749	-0.10643	-0.181755	0.0326532	0.00356609	-0.0324592	-0.0182202	-0.025203	-0.0235423	-0.105943	0.257937	0.231611	0.0848802	-0.0533396	-0.0312672	-0.0261924	0.0948458	0.0661242	-0.0161436	-0.0343988	-0.0135611	-0.12137	-0.0852736	-0.000656648	0.117102	-0.0213023	-0.0651361	0.0241105	0.0352583	-0.0549086
	680	-0.0460767	-0.113333	-0.185178	-0.0467399	-0.0406705	-0.033949	-0.00124528	-0.0310609	-0.00904664	-0.111233	0.28977	0.25094	0.0376354	-0.0539583	-0.00350964	-0.0613971	0.144266	0.0884289	0.0405247	-0.0584126	-0.0124884	-0.10812	-0.0854306	0.023503	0.116206	-0.0230098	-0.0591178	-0.0358368	0.145865	-0.00190534
	700	-0.0438253	-0.11649	-0.181312	0.0124164	-0.0486469	-0.0286136	-0.0215275	-0.0183802	-0.0526933	-0.119943	0.318901	0.324513	-0.0392479	-0.0660487	-0.00365761	0.000832208	0.149971	0.109281	0.0276816	-0.0299179	0.00825111	-0.0531494	-0.0672183	0.0555035	0.0909388	-0.0170955	-0.0749529	0.0275065	-0.127656	-0.0593977
	720	-0.115048	-0.0950863	-0.184981	0.00121275	-0.0474352	-0.0350576	-0.0341828	-0.0215848	-0.047831	-0.0591664	0.281291	0.307633	-0.00157076	-0.0847385	-0.0263845	-0.0814481	0.159167	0.0964156	-0.0015074	-0.0651655	-0.0135314	-0.102415	-0.0629792	0.0551142	0.0995869	0.0159841	-0.0891601	0.0142982	-0.0477718	0.0155779
[truncated: 96 more columns]
