# Supplementary material for: Soil-borne fungi alter the apoplastic purinergic signaling in plants by deregulating the homeostasis of extracellular ATP and its metabolite adenosine
Source: eLife. 2023 Nov 23;12:e92913. doi: 10.7554/eLife.92913 (PMC10746138; doi:10.7554/eLife.92913)
Supplement: Figure 4—figure supplement 1—source data 1. [file elife-92913-fig4-figsupp1-data1.xlsx]

## Sheet: Figure 4-Suppl 1-source data 1
Figure 4-Suppl 1-source data 1
	A - maximal amplitude of apoplastic pH represented as normalized fluorescence intensity changes (ΔF:F) - WT
	control	50 µM Ado	200 µM Ado	10 µM ATP	10 µM ATP + 50 µM Ado	10 µM ATP + 200 µM Ado
	0.050808	0.015396	0.063522	0.608265	0.0311268	0.252724
	0.021867	0.065878	0.032788	0.341326	0.0498823	0.155603
	0.033415	0.039146	0.043332	0.27802	0.326761	0.37345
	0.078383	0.086436	0.012376	0.239403	0.036107	0.227476
	0.093743	0.06949	0.01909	0.0456147	0.0295924	0.194806
	0.01181	0.023305	0.080673	0.105709	0.0181649	0.230099
	0.023851	0.040461	0.114929	0.160012	0.146873	0.385999
	0.027083	0.036956	0.116098	0.189798	0.0202683	0.947325
	0.023393	0.021797	0.032479	0.0956622	0.0246621	0.316769
	0.056659	0.049754	0.117252	0.157001	0.0204305	0.829801
	0.027752	0.051371	0.066102	0.246658	0.0614751	0.224797
	0.038406	0.027038	0.167681	0.0344021	0.158545	0.581071
	0.106766		0.106251	0.0861648		0.382788
	0.025268		0.103359	0.204379		0.836719
	0.027229
	B - maximal amplitude of apoplastic pH represented as normalized fluorescence intensity changes (ΔF:F) - ent3nsh3
	control	50 µM Ado	200 µM Ado	10 µM ATP	50 µM Ado + 10 µM ATP	200 µM + 10 µM ATP
	0.0287754	0.0670222	0.0626831	0.0262532	0.0689256	0.358024
	0.0302456	0.0590558	0.0848773	0.0579921	0.332121	0.252886
	0.0434855	0.0871005	0.056123	0.403224	0.0213167	0.468136
	0.0452521	0.0351005	0.113435	0.447247	0.388309	0.234563
	0.029131	0.0204095	0.0297731	0.388489	0.234016	0.243921
	0.0408935	0.0309962	0.0393263	0.290529	0.488094	0.351483
	0.0311354	0.0476341	0.0954041	0.107789	0.430542	0.0838095
	0.0684692	0.0245165	0.0552028	0.10832	0.424049	0.080705
	0.0335525	0.0150905	0.0532475	0.0575922	0.0438383	0.127905
		0.0323412	0.151981	0.0671486	0.129313
		0.0312509	0.0472378	0.0835094	0.118711
			0.0337464	0.109771	0.26269
			0.0380637		0.0803796
	C - maximal amplitude of apoplastic pH represented as normalized fluorescence intensity changes (ΔF:F) - dorn1
	control	50 µM Ado	200 µM Ado	10 µM ATP	50 µM Ado + 10 µM ATP	200 µM + 10 µM ATP
	-0.02516	0.060378	0.100982	0.03142	0.179369	0.028789
	0.129248	0.124935	0.097633	0.122625	0.019181	0.023087
	0.005008	0.121512	0.044488	0.014218	-0.00616	0.034215
	0.096908	0.103324	0.075584	0.089186	-0.00417	0.028775
	0.10851	0.076012	0.13525	0.093924	0.044444	0.010044
	0.051811	0.08115	0.042751	-0.06771	0.011648	0.033572
	0.099924	0.113347	0.043687	-0.06362	-0.02436	0.051695
	0.100595	0.217792	0.047921	-0.05648	0.065506	0.005961
	0.085061	0.043098	0.262073	-0.06751	0.006993	0.0521
	0.158237	0.034347	0.084218	-0.00292	0.097539	-0.00555
	0.100423	0.060337	0.091846	-0.06338	0.072358	0.073365
	0.194197	0.015528	0.073387	-0.03121	0.044836	0.187123
	0.076099	-0.00984	0.089572	-0.0491	0.100287	0.276602
	0.113542	0.026215	0.093533	0.111219	0.128638	0.237912
	0.015077	0.02298	0.046983	0.031258	0.115735	0.298367
	0.091235	-0.00237		-0.02514	0.07001	0.232278
	-0.00399	0.058622		0.040478	0.179526	0.180225
		0.03014		0.149488	0.255159
		0.033474		0.079712	0.141232
				0.015332
	C - Apoplastic pH prior to treatment
	WT	dorn1	ent3 nsh3
	5.65543	6.25522	6.29156
	5.60373	5.80638	6.15417
	5.61478	5.70461	5.77428
	5.58806	5.87248	5.88235
	5.49178	6.14206	5.74508
	5.65755	6.87824	5.98735
	5.62319	5.76288	5.44085
	5.67736	5.90604	6.06479
	5.44757	5.98302	6.04477
	5.53138	5.83764	6.42084
	5.29764	5.65513	5.53374
	5.62486	5.59957	6.36821
	5.62952	5.9635	6.02219
	5.26907	5.81811	6.74632
	5.43556	6.12842	6.10562
	5.46368	5.98901	6.33451
	5.51512		5.34819
	5.48717		6.64411
	5.43249		6.50547
	5.65443		5.8024
	5.40669		5.38353
	5.64412		5.46225
	5.65337
	5.4128
	5.67407
	5.85734
	5.26001
