# Supplementary material for: Soil-borne fungi alter the apoplastic purinergic signaling in plants by deregulating the homeostasis of extracellular ATP and its metabolite adenosine
Source: eLife. 2023 Nov 23;12:e92913. doi: 10.7554/eLife.92913 (PMC10746138; doi:10.7554/eLife.92913)
Supplement: Figure 4—source data 1. [file elife-92913-fig4-data1.xlsx]

## Sheet: Sheet1
Figure 4-source data 1
	A,B - normalized apoplsatic pH signal - WT
	time [sec]	control															50 µM Ado												10 µM ATP														10 µM ATP + 50 µM Ado
	-270	-0.03223	-0.02967	-0.02783	-0.03634	-0.04052	-0.00246	-0.02212	-0.03946	-0.00697	0.053096	-0.00366	-0.04516	-0.01658	-0.01313	-0.03695	-0.01466	-0.08283	-0.04937	-0.0162	-0.04908	-0.05011	-0.06374	-0.02731	-0.00802	-0.06621	-0.08975	-0.00274	-0.0027	0.010243	-0.0166	-0.02193	0.009107	-0.01538	-0.08742	-0.03039	0.010941	-0.02216	-0.03611	0.017036	0.045495	0.008283	0.000388	-0.00314	0.009479	-0.03209	-0.03844	-0.01656	-0.02
	-240	-0.02593	0.009622	-0.01383	-0.01044	-0.0502	-0.00042	-0.00849	-0.02776	-0.01467	0.032443	-0.00859	-0.01566	-0.01745	0.012199	-0.00357	0.009882	-0.04517	-0.01904	-0.0492	-0.06164	-0.03749	-0.0436	-0.02091	-0.01491	-0.04496	-0.04996	-0.00961	0.010501	0.020597	0.010927	0.01604	0.044378	-0.03156	-0.06765	-0.0045	0.029598	-0.03068	-0.0193	0.013776	0.028704	-0.03329	0.006861	-0.00293	-0.02707	-0.0176	-0.01589	-0.0076	-0.01
	-210	-0.00354	0.005773	-0.00928	-0.02974	-0.03598	-0.02069	-0.01112	-0.01409	0.000735	0.029646	0.011933	-0.02464	-0.01252	-0.01544	-0.0175	0.006787	-0.0572	-0.00616	-0.01214	-0.02542	-0.00666	-0.01868	-0.00198	-0.00025	-0.03486	-0.02838	-0.01319	0.046119	0.006499	0.040746	-0.00531	0.033617	-0.02003	-0.05827	0.009724	0.007359	0.010442	-0.0368	-0.00777	-0.00668	-0.0261	-0.01372	-0.00076	0.029759	0.000471	0.006241	-0.01184	-0.01
	-180	-0.0012	-0.00064	-0.00362	-0.01374	-0.00972	-0.00582	0.001425	-0.00324	-0.01952	-0.00413	0.003409	-0.00449	0.031534	0.021927	-0.02638	0.014083	-0.02022	-0.01964	-0.04319	-0.00242	-0.00405	0.02301	-0.01409	0.013182	-0.00797	0.013008	-0.01169	0.010808	0.028307	0.010301	-0.01249	0.011099	-0.01649	-0.01887	-0.0003	0.005567	-0.0204	-0.02805	-0.00692	-0.00615	-0.02797	-0.00324	0.000975	0.043907	-0.00913	0.006516	-0.01461	-0.05
	-150	0.01241	-0.01956	0.002673	-0.0149	-0.01702	0.00541	0.010098	0.015079	-0.00697	-0.01704	0.002176	0.019144	-0.05803	-0.00077	-0.00525	0.012977	0.007805	-0.00965	-0.01326	-0.00052	0.015968	0.001467	0.006654	0.021663	-0.0043	0.005018	0.002923	-0.00362	-0.01465	0.021353	-0.0174	-0.02278	-0.01516	0.001787	0.008092	-0.01234	0.004421	-0.02966	0.010233	-0.01051	-0.0486	-0.0044	-0.00228	-0.00538	0.012894	-0.00338	0.019753	-0.03
	-120	-0.01101	0.005131	-0.00299	0.009683	0.00312	0.012846	0.006226	0.009724	0.009383	0.001678	-0.00646	0.014931	-0.00643	0.002162	0.000413	-0.0109	0.028564	0.014538	-0.01088	0.006662	0.01267	0.004146	0.036029	0.004877	0.00278	0.035541	0.012768	-0.01652	-0.00848	-0.00867	0.006216	-0.01082	0.010549	0.014677	0.01089	0.014075	-0.00469	-0.01446	0.018453	0.021265	0.041413	-0.00544	0.005959	-0.04971	0.012329	0.030297	0.002654	0.028
	-90	0.024118	-0.00064	0.006917	0.016941	0.036689	0.010076	0.015054	0.008033	0.014122	-0.0136	0.028082	0.012732	-0.02006	-0.00695	0.021393	0.003471	0.043312	0.007558	0.026043	0.019786	0.016309	0.022894	0.00735	0.017246	0.025863	0.040015	-0.02392	-0.03064	0.009803	-0.02911	-0.00229	-0.02377	0.025618	0.042655	-0.00823	-0.01652	0.000896	0.014323	-0.01259	-0.02092	-0.03141	0.029903	-0.00379	-0.01575	0.030212	0.006791	0.008028	-0.01
	-60	-0.00354	-0.00337	0.008332	0.028652	0.019115	0.002202	0.002974	-0.00085	0.007369	-0.01553	-0.00971	0.038381	0.027767	0.000309	0.016186	0.008777	0.021304	0.022722	0.048281	0.017654	0.014148	0.016955	0.000807	0.003287	0.043044	0.010611	0.020524	0.008659	-0.01817	0.010301	-0.01891	-0.01839	0.006338	0.010722	0.008558	-0.01652	0.01852	0.030211	-0.02435	-0.01582	0.02141	-0.01036	-0.00878	0.027636	0.003106	-0.01782	0.00868	0.019
	-30	0.019874	0.012348	0.035372	0.019415	0.045575	0.001764	-0.00291	0.027762	0.002393	-0.02263	0.015297	0.012	0.015883	0.00803	0.022771	-0.02704	0.04887	0.026332	0.044645	0.040424	0.015513	0.022079	0.001364	-0.0112	0.053929	0.037458	0.024402	-0.02757	0.004736	-0.0312	0.007916	-0.0176	0.031823	0.105057	-0.0073	-0.00712	0.008386	0.025375	-0.00054	-0.03145	0.056415	-0.00583	-0.00574	-0.04193	-0.01308	0.012152	-0.00826	0.01
	0	0.021044	0.021007	0.004245	0.030467	0.048932	-0.0029	0.008859	0.024803	0.014122	-0.04393	-0.03248	-0.00724	0.055881	-0.00834	0.028896	-0.00338	0.055563	0.032711	0.025903	0.054556	0.023702	0.035471	0.012084	-0.02587	0.032683	0.026432	0.000537	0.004974	-0.03888	-0.00805	0.048157	-0.00484	0.024289	0.057304	0.013455	-0.01503	0.035263	0.094455	-0.00734	-0.00392	0.03985	0.005825	0.020479	0.029051	0.012894	0.013527	0.019753	0.067
	30	0.023532	-0.00946	0.021537	0.051746	0.041428	0.012992	-0.00477	0.007469	0.025732	-0.0392	0.003634	-0.00027	0.030085	0.027795	0.01833	-0.01444	0.046261	0.043061	0.035693	0.02573	0.025635	-0.01134	-0.01019	-0.00148	0.045929	0.017483	-0.029	0.061471	0.036458	0.030111	-0.01929	0.006118	0.047779	0.046464	-0.02619	-0.00593	0.013086	0.083633	-0.0055	0.038906	0.087982	-0.01346	0.005526	-0.00396	-0.00273	0.007753	0.017474	0.057
	60	0.049289	-0.05789	0.033171	0.048612	0.093164	-0.01398	0.001115	0.014374	0.0127	-0.03898	-0.01027	0.016763	0.048635	0.014978	0.002251	-0.04649	0.047849	0.034396	0.050659	0.035937	-0.00052	0.005077	-0.0113	-0.01721	0.040814	0.024514	-0.02512	0.467391	0.321071	0.160856	0.192496	-0.00205	0.044012	0.071219	0.082713	0.010941	0.107227	0.145114	-0.01443	0.089703	0.112049	0.002977	0.033915	0.183267	0.0048	0.018888	-0.01754	0.063
	90	0.051191	-0.0101	0.009118	0.067747	0.073022	-0.0274	0.023417	0.021421	0.010331	-0.07728	-0.02564	0.014198	0.049504	0.012353	-0.01015	-0.04583	0.070083	0.027776	0.048841	0.044349	0.005163	0.0109	0.003035	-0.00926	0.030584	0.005657	0.00531	0.520818	0.344641	0.258237	0.223102	0.000339	0.053541	0.14446	0.144743	0.090497	0.154518	0.204753	0.017319	0.08694	0.18331	-0.02291	0.022863	0.326401	-0.01308	-0.00874	0.000537	0.097
	120	0.048703	-0.03031	-0.01918	0.023869	0.077762	-0.03542	-0.00787	-0.0031	-0.0072	-0.06329	-0.02463	0.01145	0.043997	0.019302	-0.00311	-0.05003	0.036392	0.037765	0.057232	0.069137	0.016992	0.03943	-0.02536	-0.02039	0.030191	0.05296	-0.00394	0.613854	0.34376	0.272416	0.227636	-0.0425	0.085453	0.128054	0.187417	0.095124	0.15819	0.209588	0.022421	0.070362	0.192686	-0.00466	0.041933	0.291973	-0.05073	-0.00324	-0.00419	0.086
	150	0.052947	-0.02774	-0.00063	0.077809	0.097508	-0.03731	-0.02057	0.012401	-0.00021	-0.0676	-0.03113	-0.00302	0.030375	-0.01251	-0.00847	-0.05666	0.06997	0.028739	0.061149	0.05321	0.021655	-0.00482	-0.03887	-0.00767	0.026912	0.008693	-0.03466	0.450197	0.332966	0.280757	0.225558	0.006516	0.059746	0.13699	0.142877	0.041539	0.128523	0.214194	0.016185	0.063561	0.212377	-0.01463	0.033048	0.26462	-0.03059	0.002804	-0.02177	0.125
	180	0.038898	-0.04298	0.011162	0.083087	0.096718	-0.03338	0.00065	0.004369	-0.0367	-0.05189	-0.04594	-0.01163	0.055011	-0.01065	-0.02439	-0.07413	0.067247	0.038367	0.055974	0.048611	0.004595	-0.01542	-0.05502	-0.01403	0.038453	0.009492	-0.02691	0.443441	0.317766	0.221328	0.237649	0.00811	0.077919	0.131277	0.117692	0.038554	0.1413	0.251036	0.021146	0.045813	0.153305	-0.02188	0.038682	0.259432	-0.02682	-0.00448	-0.02422	0.152
	210	0.041093	-0.05564	0.012734	0.053396	0.068086	-0.05787	-0.01871	-0.01353	-0.02734	-0.0876	-0.05211	-0.00522	0.034143	0.020383	-0.03021	-0.09292	0.058739	-0.00809	0.077792	0.055005	-0.00018	-0.01612	-0.07506	-0.02092	0.042257	-0.01704	-0.04988	0.331675	0.251019	0.222579	0.195519	0.007313	0.061519	0.130691	0.117459	0.021538	0.127348	0.223174	0.027949	-0.00743	0.093296	0.003236	0.04475	0.244576	-0.03341	0.013527	-0.00874	0.14
	240	0.043142	-0.04602	-0.00299	0.071376	0.058607	-0.07391	-0.02707	0.006764	-0.02805	-0.06114	-0.03943	-0.00156	0.108342	-0.00386	-0.02899	-0.10441	0.043879	0.024407	0.072058	0.068016	0.021541	-0.03999	-0.07339	-0.01933	0.036486	-0.0156	-0.06181	0.283468	0.27459	0.263867	0.179838	-0.02278	0.081021	0.138894	0.089243	0.009597	0.106052	0.222483	0.013918	0.006281	0.156743	-0.02369	0.035865	0.20449	-0.02456	0.001292	4.89e-05	0.141
	270	0.037142	-0.04586	-0.01729	0.064447	0.066309	-0.08033	-0.04132	-0.01311	-0.04594	-0.03855	-0.05682	-0.04314	0.07472	-0.02563	-0.0371	-0.04583	0.028678	0.029221	0.070519	0.071829	-0.01156	-0.02928	-0.04792	-0.01279	0.021928	-0.00745	-0.03526	0.306497	0.264016	0.207148	0.18116	0.046171	0.089442	0.164235	0.079682	0.009448	0.08461	0.222253	0.011225	0.003092	0.094233	-0.00531	0.022429	0.200245	0.035859	-0.00283	-0.01477	0.107
	300	0.042703	-0.10471	-0.01729	0.062303	0.095336	-0.1022	-0.04132	-0.03565	-0.03303	-0.03145	-0.04347	-0.01676	0.059359	-0.00726	-0.06038	-0.10265	0.048643	-0.00688	0.078352	0.05063	-0.00496	-0.03987	-0.07506	-0.0165	0.001993	-0.02055	-0.0809	0.325534	0.242207	0.241138	0.224991	0.033617	0.096977	0.122634	0.067556	0.00109	0.053034	0.243668	0.012075	0.012551	0.13799	-0.0189	0.018529	0.142237	0.017224	-0.03225	-0.02389	0.107
	330	0.048118	-0.05709	0.000314	0.050261	0.077959	-0.09214	-0.05046	-0.03396	-0.02805	-0.03425	-0.03797	-0.03087	0.086314	-0.01961	-0.0443	-0.11083	0.033896	0.002864	0.089681	0.042891	-0.00701	-0.04395	-0.08787	-0.03064	0.015502	-0.01751	-0.02034	0.268116	0.207622	0.195262	0.20232	0.028237	0.069941	0.131423	0.054264	-0.02249	0.075798	0.235839	0.010091	0.015101	0.011408	-0.02084	0.036299	0.175722	0.003859	-0.00599	-0.01754	0.124
	360	0.04402	-0.06847	0.017293	0.039045	0.072627	-0.08573	-0.05975	-0.02029	-0.06099	-0.03683	-0.05726	-0.00834	0.081966	-0.01544	-0.07141	-0.08319	0.052387	0.00828	0.089541	0.055678	-0.00018	-0.04802	-0.08077	-0.01403	0.008289	-0.0303	-0.03138	0.257676	0.195947	0.149178	0.159056	-0.00723	0.090107	0.137575	0.027214	-0.02503	0.052005	0.204753	0.015193	-0.03315	0.097984	-0.03236	0.038682	0.180909	-0.00913	-0.02579	-0.00663	0.083
	390	-0.00193	-0.11578	0.000629	0.024199	0.069073	-0.1251	-0.085	-0.04355	-0.06573	-0.06157	-0.05928	-0.04717	0.096458	-0.01683	-0.08703	-0.14089	0.042858	0.0013	0.049959	0.053883	0.00812	-0.05548	-0.09678	-0.00979	-0.01165	-0.05571	-0.01527	0.196573	0.215773	0.080991	0.145831	-0.0158	0.095426	0.121902	0.002262	-0.02249	0.051124	0.25426	-0.00933	0.005962	0.076418	-0.04065	0.02568	0.112526	0.009882	-0.02441	-0.01265	0.099
	420	0.012995	-0.08467	-0.01556	0.033931	0.057423	-0.1321	-0.07415	-0.02452	-0.05329	-0.04286	-0.04997	-0.02812	0.100226	-0.04138	-0.08917	-0.13249	0.013817	0.016945	0.069261	0.03818	-0.02452	-0.09763	-0.10458	-0.02057	-0.00902	-0.04788	-0.03377	0.184291	0.182069	0.073693	0.134307	-0.02377	0.0808	0.135964	0.041438	-0.01861	0.071245	0.207286	0.005839	-0.01859	0.028911	-0.03689	0.034565	0.140822	0.009506	-0.01727	-0.04115	0.098
	450	0.022215	-0.09429	-0.01116	0.050921	0.022669	-0.10308	-0.0805	-0.06215	-0.07769	-0.04393	-0.03652	-0.05304	0.09327	-0.02038	-0.08595	-0.12829	0.023686	-0.00977	0.051778	0.013056	-0.00348	-0.07201	-0.11126	-0.03223	-0.02804	-0.06226	-0.00155	0.117662	0.145941	0.068688	0.086887	-0.02457	0.086561	0.137429	0.04377	-0.03473	0.046425	0.196924	-0.01074	-0.02518	0.141741	-0.03586	0.050385	0.094605	-0.00424	-0.02579	-0.02014	0.101
	480	0.019288	-0.09189	-0.00472	0.009353	0.010624	-0.12612	-0.08716	-0.0823	-0.08646	-0.04522	-0.06321	-0.05194	0.077039	-0.03768	-0.10035	-0.15305	0.018128	0.007799	0.065904	0.012271	-0.0219	-0.08098	-0.11404	-0.0165	-0.01742	-0.07361	-0.06628	0.143147	0.156074	0.078697	0.121649	0.016081	0.109166	0.131716	0.009025	-0.02473	0.033794	0.212121	-0.00592	-0.04271	0.030786	-0.02757	0.001842	0.115591	0.000847	-0.03692	-0.03496	0.075
	510	0.002459	-0.12524	-0.03349	-4.9e-05	0.022274	-0.13282	-0.11969	-0.06412	-0.07829	-0.05576	-0.06725	-0.04241	0.077039	-0.05034	-0.08718	-0.12895	0.012342	-0.02494	0.054715	-0.00377	-0.02213	-0.08808	-0.10332	-0.00148	-0.00456	-0.07073	-0.08299	0.168018	0.102324	0.08391	0.104079	-0.00066	0.097642	0.116629	0.002728	-0.01563	0.030122	0.171594	-0.00111	-0.03506	0.109861	-0.04427	0.031964	0.091068	0.0112	-0.04971	-0.06362	0.068
	540	0.005825	-0.09461	-0.02594	0.000775	0.0047	-0.14362	-0.11334	-0.08455	-0.09061	-0.06394	-0.06904	-0.05469	0.097328	-0.04988	-0.09055	-0.12453	0.018468	0.010326	0.066044	-0.00668	-0.01451	-0.08808	-0.10611	-0.03099	-0.00692	-0.07664	-0.0463	0.197494	0.160921	0.07411	0.147721	0.04358	0.110052	0.140359	0.026048	0.002731	0.029535	0.18541	0.009099	-0.01848	0.065792	-0.02239	0.005959	0.141058	-0.01158	-0.07748	-0.05923	0.065
	570	-0.00266	-0.11418	-0.03632	0.013147	0.012796	-0.14201	-0.10823	-0.09442	-0.08303	-0.0336	-0.06713	-0.03215	0.083995	-0.04771	-0.1031	-0.15504	0.000431	0.000818	0.030798	-0.00399	-0.02145	-0.09332	-0.09984	-0.03841	-0.01925	-0.07441	-0.02959	0.161263	0.153431	0.083493	0.129395	0.025048	0.078583	0.118826	0.022083	-0.03817	0.02601	0.188864	0.030783	-0.0341	0.027973	-0.05773	0.002275	0.092011	-0.02174	-0.09053	-0.07291	0.037
	600	0.000995	-0.12781	-0.0088	-0.0045	-0.01228	-0.15149	-0.10776	-0.08357	-0.08539	-0.05533	-0.07947	-0.05414	0.09327	-0.05667	-0.09667	-0.13448	0.023006	0.003827	0.05989	0.004531	-0.0268	-0.08214	-0.09163	-0.03453	0.009731	-0.04836	-0.00066	0.173852	0.141315	0.059513	0.141297	0.012893	0.078362	0.120291	0.017886	-0.00369	0.004274	0.151101	0.033901	-0.03548	0.038287	-0.06097	0.025247	0.083758	-0.02268	-0.09287	-0.06395	0.042
	630	0.010215	-0.13871	-0.04307	0.012817	0.002922	-0.14187	-0.12635	-0.11457	-0.10482	-0.06093	-0.07868	-0.04901	0.109501	-0.06841	-0.10402	-0.12895	0.001679	-0.00388	0.065484	-0.01678	-0.04567	-0.09984	-0.09622	-0.0476	-0.0123	-0.08415	-0.04421	0.111213	0.107831	0.068688	0.127695	-0.02457	0.103626	0.111355	0.01672	0.006612	0.008827	0.163075	0.02809	-0.02836	0.077668	-0.07197	0.003142	0.075505	-0.0464	-0.09108	-0.04799	0.013
	C,D - normalized apoplsatic pH signal - ent3nsh3
	time [sec]	control											50 µM Ado											10 µM ATP												10 µM ATP + 50 µM Ado													200 µM Ado
	-270	0.0268324	0.0193255	0.0426252	0.0429536	-0.00254694	0.0397178	0.0179969	-0.0680864	-0.0460587	-0.0548009	0.00831255	-0.0715737	-0.0540712	-0.0477947	-0.0259598	-0.0249582	-0.0097003	-0.0580991	-0.0177842	-0.0170188	0.0256178	0.0266711	0.0234537	0.00158924	0.00816389	0.00968642	0.0255678	0.0220067	0.0312055	0.0289801	0.0492401	0.0285363	0.0338343	0.0484081	0.0659247	0.0021924	0.0167559	-0.00551256	-0.0100825	-0.0425197	-0.0868109	0.012021	-0.0178834	-0.0462283	-0.0354241	-0.00894539	0.0760248	-0.0251229
	-240	0.0157974	0.0147783	0.000954944	0.0127855	-0.0149855	0.0366508	-0.00792662	-0.053108	-0.058981	-0.0145199	-0.00789692	-0.0608197	0.0143092	-0.0514825	-0.0486289	0.00728445	-0.0227306	-0.032442	-0.0454139	-0.00695842	-0.0241695	0.0293052	0.0129671	-0.00802011	-0.0291898	0.0287309	0.015244	-0.0162875	0.017183	0.0156616	0.0375486	0.0325405	0.0182763	0.0221328	0.0445205	0.0181371	-0.0169542	0.00952169	0.0121086	-0.0351706	-0.0352911	0.0305147	0.00399748	-0.0243235	-0.041274	-0.0289548	0.0367016	0.0185691
	-210	0.00360088	-0.0162941	-0.0111989	-0.0094814	-0.0244625	-0.00986556	-0.00692956	-0.0257562	-0.0285213	-0.0126464	0.0203658	0.00848369	0.0345701	-0.0470571	-0.00621572	0.0192262	0.000796294	-0.0381436	0.0067323	-0.00486251	-0.000633656	-0.00493909	0.00106883	0.0200687	-0.021488	-0.0261041	0.022932	0.00410295	0.0158476	0.00974226	0.0111749	0.0333413	0.014686	0.0195289	-0.00256849	0.0148153	0.0162602	-0.00495573	0.00390757	-0.016273	0.00850077	-0.0198294	0.0149379	-0.0129147	-0.0146246	-0.00835687	-0.00500477	0.0076461
	-180	-0.0277616	-0.0269041	0.00312527	0.00560264	0.00574542	0.0177376	0.0279675	-0.0312917	-0.0192911	-0.018267	-0.0112219	0.037161	0.0016462	-0.0330432	0.00109689	0.00907571	-0.0089764	-0.0113461	-0.0103903	0.0106472	0.0093238	-0.000987817	-0.00800613	0.00787227	-0.0122458	-0.0494172	0.00404165	0.00435161	0.0122863	0.00604267	0.0196036	0.00317664	-0.0143783	0.00106521	0.0117009	0.0188015	0.0212175	0.00952169	-0.00091659	0.0309711	-0.000515198	0.0582554	-0.0031559	0.00853375	-0.00162496	-0.00600282	-0.00977121	0.036319
	-150	-0.00743408	0.00644183	0.00703186	-0.020974	-0.0120239	0.0110924	-0.00892368	-0.00263749	-0.00175374	0.0257611	0.0311721	0.00609392	-0.0173484	0.0429267	-0.0164534	-0.00883688	0.010569	0.0285649	0.0133479	0.0110664	0.0129447	0.00889035	-0.0114344	-0.0264996	-0.0230283	-0.00246265	-0.021658	0.00758423	0.000712251	-0.00209644	0.0283042	0.0250661	0.0157118	0.00390579	0.00504186	0.0317566	0.0132857	-0.0121944	-0.00863524	0.0015748	-0.0288511	-0.0588719	0.00862613	0.0391092	0.0139747	-0.00600282	0.0498093	-0.0237575
	-120	0.0123127	-0.00113679	-0.00555604	-0.0475506	-0.000177694	-0.0303123	0.0160028	0.0051773	0.0268599	-0.0173302	-0.00415628	0.0252121	0.00797771	0.0134238	0.0318099	0.00250776	0.010207	-0.00165346	0.0082889	0.00477867	0.0319544	-0.0194271	0.00389215	-0.00173707	0.0489834	0.00541783	-0.00650178	0.0115628	0.00583155	-0.00160316	0.0149814	-0.0136409	-0.0145492	-0.0188188	-0.0111301	-0.00445124	-0.0194329	0.0184309	-0.00911766	0.023622	0.0368367	-0.00441796	-0.00063118	-0.00287501	0.00292493	0.0204802	-0.0324118	-0.00873839
	-90	-0.00859566	0.010989	-0.0155395	0.00560264	0.0134455	-0.00884322	0.00353956	0.0230862	0.0245523	0.0173302	-0.00124688	-0.0130243	-0.0262125	0.0030978	0.0230347	0.00728445	-0.000289561	0.0194424	0.0152936	0.0152582	-0.0114963	-0.00362199	0.0129671	-0.00136748	0.00123229	0.0106715	-0.00672143	-0.0103195	-0.00195869	-0.0122087	-0.0271622	-0.00536558	-0.0195073	-0.0254468	-0.00589802	-0.029697	-0.0184414	-0.0266719	-0.00911766	-0.0204724	0.00206079	0.0222953	0.00441826	-0.0151965	0.0172246	0.00105932	0.0021449	-0.0169306
	-60	0.0076664	-0.0390299	-0.000781318	0.0386439	-0.00254694	-0.0211113	-0.013909	0.0569503	0.0273214	0.0238876	-0.00166251	0.0383558	0.0016462	0.0584157	0.0142596	0.00370193	0.00767337	0.0245738	0.0250224	-0.00989269	-0.0178329	-0.0128416	-0.00437615	-0.000997893	0.0104744	-0.00443277	-0.0115538	-0.0078329	-0.0202101	-0.00801578	-0.0336877	-0.00990363	-0.00582996	-0.0162149	-0.0211187	-0.0127558	0.0117985	0.021215	-0.0380626	-0.000524934	0.0432767	0.00174664	0.0262992	0.0135536	0.0159246	0.00812147	0.00691134	-0.0210268
	-30	-0.0144035	0.00492611	-0.0172758	-0.0231289	0.00752236	-0.00782089	-0.0109178	0.0403439	0.0319365	-0.00421546	-0.0120532	0.0622536	0.00544511	0.0156365	0.0303473	-0.0034631	0.0120168	0.0513712	-0.0150601	0.00435949	-0.0024441	-0.00625617	-0.0160728	0.0100898	0.0316543	0.0205221	-0.00540351	-0.00460027	-0.0293358	-0.00826242	-0.0315125	-0.0387336	-0.0123267	-0.0292342	-0.038242	0.000863673	-0.0253817	0.00729439	0.029958	0.0141732	0.0394127	-0.0105826	-0.0342941	0.0267878	0.0256744	0.0157721	-0.0765014	0.0445112
	0	-0.00801487	0.0269041	-0.00338571	-0.00445338	0.0300302	-0.0272453	-0.0169001	0.0553222	0.0439358	0.0548009	-0.0216126	-0.0321424	0.0320375	0.045877	-0.00329068	-0.0118223	0.000434342	0.0177319	0.0199634	-0.0073776	-0.0232642	-0.0167929	-0.0144594	-0.000997893	-0.0145564	0.00738795	-0.0159469	-0.0105682	-0.0315616	-0.0282402	-0.0684902	-0.0550172	-0.015917	-0.00532607	-0.0482306	-0.0396625	0.000892326	-0.016649	0.029958	0.0446194	0.0213807	-0.0311312	-0.00231433	0.0135536	0.0172246	0.0128296	-0.0479028	-0.0114691
	30	-0.021373	-0.0367563	-0.00946263	-0.0252837	0.00989161	-0.0129326	-0.0348472	0.0367621	0.0462433	-0.00608899	-0.0261845	0.0395507	0.0649614	0.0576781	0.00402194	-0.0130165	0.0340958	0.0411084	0.0269681	0.0018444	-0.00425455	-0.0214027	-0.0307944	-0.0553276	0.017406	0.0123132	0.0501691	0.104314	-0.0442486	-0.0262671	-0.0918731	-0.0312592	-0.0367749	-0.0188188	-0.0330099	-0.0190672	-0.00109062	-0.00773985	0.09026	0.0992126	0.0754766	-0.01161	0.00147275	-0.00333136	0.0204745	0.00929849	-0.0479028	0.0404151
	60	-0.0382158	-0.0344828	-0.0428857	-0.0439592	-0.00195463	-0.032357	-0.0458148	0.0611833	0.0614731	-0.0370023	-0.0419784	0.0228223	0.0409016	0.092344	0.0354662	0.00310485	0.00115825	0.0291351	0.0114021	-0.0388162	-0.0603784	-0.0306223	-0.0372477	0.0385482	0.241913	0.345592	0.336599	0.277633	0.0732728	0.0635097	-0.00595448	0.0373455	0.00989896	0.0768138	-0.0739155	0.222097	-0.0585961	0.310763	0.242221	0.36273	0.28542	0.244221	-0.00694298	0.0130972	0.0113747	0.034016	0.00452812	0.00354997
	90	-0.0341503	-0.0261463	-0.0411494	-0.0331849	0.0241071	-0.0338905	-0.0398325	0.071603	0.0956249	-0.00796253	-0.0444722	0.0323814	0.0396353	0.0547278	0.0244973	-0.0267495	0.0207036	0.0194424	-0.00649881	-0.0392354	-0.0621888	-0.0516958	-0.035231	0.0529623	0.341266	0.448366	0.384923	0.300012	0.103766	0.105932	0.0446179	0.0579002	0.0567438	0.10806	-0.013984	0.330388	-0.0680151	0.377582	0.22196	0.497113	0.425811	0.323333	0.0157795	0.0026012	0.0152746	0.152895	-0.0860343	0.00628072
	120	-0.0289232	-0.0701023	-0.0441879	-0.0532969	0.0140378	-0.0318458	-0.0343487	0.0859301	0.0683958	0.0107728	-0.0714879	0.0706178	0.0143092	0.0326007	0.020841	-0.0482446	0.00875923	0.0120303	-0.014671	-0.0295942	-0.0495157	-0.041159	-0.0277694	0.0418746	0.404806	0.411591	0.39305	0.252518	0.103766	0.0970527	0.0171565	0.0557647	0.0801662	0.0732631	0.00837139	0.3078	-0.0947849	0.387605	0.195909	0.417323	0.437403	0.422994	0.0233537	0.0756172	0.0705232	0.212924	-0.0586273	0.0021846
	150	-0.040539	-0.0943539	-0.0737043	-0.026002	0.00989161	-0.0538261	-0.065756	0.080069	0.0840871	-0.0145199	-0.0581879	0.00489903	0.0282386	0.0362885	0.0149909	-0.0183903	-0.0107862	0.00803923	0.00400825	-0.0400738	-0.0603784	-0.0747448	-0.00155283	0.00750268	0.371303	0.316697	0.296841	0.216213	0.0919694	0.0911333	0.0117186	0.0643069	0.0538373	0.0424902	0.016933	0.250997	-0.124529	0.315775	0.128853	0.35853	0.35626	0.394226	0.0254576	0.0897641	0.0991225	0.251766	0.00571973	-0.0114691
	180	-0.0585434	-0.0852596	-0.0806494	-0.073409	-0.0232779	-0.0548484	-0.073234	0.0637882	0.0836256	0.018267	-0.0685786	-0.0142191	0.0143092	0.020062	-0.000365631	-0.0261524	-0.011872	0.00860939	-0.0154493	-0.0488766	-0.0504209	-0.0543299	0.0125638	0.000480467	0.329328	0.360039	0.233581	0.174935	0.0737179	0.0886669	0.0041056	0.0175916	0.0700792	0.0216594	0.0364346	0.212131	-0.0754511	0.331366	0.148632	0.336483	0.287996	0.340799	0.0439722	0.12901	0.120572	0.263536	-0.0204957	0.00901147
	210	-0.0498316	-0.088291	-0.0897647	-0.0676627	-0.0446011	-0.0308235	-0.0582781	0.0816971	0.0831641	0.0257611	-0.0665004	-0.0249731	-0.0135494	-0.0234548	-0.00402194	-0.0249582	-0.00173737	0.00119733	0.000505896	-0.0363011	-0.0576627	-0.0688179	0.00671547	-0.0154119	0.248845	0.283205	0.18965	0.154296	0.0519053	0.0536441	-0.0413007	0.0114519	0.0565728	0.00935022	-0.0087519	0.167287	-0.113623	0.207751	0.115828	0.323885	0.204276	0.25244	0.00862613	0.12901	0.116022	0.23823	0.00691134	0.0335882
	240	-0.0637705	-0.105722	-0.0789131	-0.0770004	-0.0398626	-0.0783622	-0.0413281	0.0966755	0.103009	0.0679157	-0.0702411	0.0204325	0.000379891	0.0126862	-0.00914077	-0.0124194	-0.0299696	0.0205827	-0.032961	-0.0388162	-0.0323165	-0.0582812	0.0123621	-0.0253908	0.235752	0.258578	0.148574	0.0985951	0.0392183	0.0376125	-0.0532641	0.0095833	0.0379375	0.00106521	-0.0453767	0.129418	-0.0690065	0.139262	0.0946018	0.264042	0.276404	0.18463	0.0296655	0.0751609	0.0737732	0.22234	0.0152526	0.0445112
	270	-0.056801	-0.103448	-0.0797812	-0.020974	-0.0149855	-0.0890968	-0.090184	0.0839764	0.113624	0.0257611	-0.103076	0.0431354	0.000379891	-0.0367311	-0.00402194	-0.0273465	-0.00354713	-0.0330121	-0.0360743	-0.0539068	-0.0440844	-0.0839644	0.0202271	-0.0442399	0.131392	0.185684	0.125511	0.120726	0.00872507	0.027007	-0.053536	-0.0160434	0.0136602	0.00153864	-0.0420472	0.0716184	-0.0784255	0.101398	0.0830238	0.163255	0.141164	0.191822	-0.0229329	0.107105	0.0523237	0.236464	-0.0514776	-0.0101038
	300	-0.0748054	-0.119363	-0.0975779	-0.088493	-0.0434165	-0.0517814	-0.0697443	0.0859301	0.105317	0.00515222	-0.0876974	0.0383558	-0.0363429	-0.0404189	-0.0113346	-0.0404824	0.010207	0.00746907	-0.0516403	-0.0534876	-0.0377478	-0.0589397	-0.0180894	-0.036109	0.0982748	0.216221	0.0730132	0.0607982	0.0207443	0.027007	-0.0728405	-0.0291236	0.0259698	-0.0152681	-0.0520358	0.0540128	-0.0620662	0.0913748	0.0753051	0.143307	0.244204	0.157916	-0.00399748	0.0587323	0.038674	0.175259	-0.0276454	0.0172037
	330	-0.0771286	-0.132247	-0.104957	-0.0540152	-0.0315702	-0.0890968	-0.100653	0.0810459	0.120085	0.00983607	-0.0822943	0.0108735	-0.0110168	-0.0308305	-0.0288848	-0.0255553	-0.00282322	-0.0284509	-0.0520294	-0.0576794	-0.0612836	-0.0813303	-0.0114344	-0.0313043	0.118299	0.179445	0.089707	0.0670148	0.00872507	-0.0018498	-0.0793659	-0.0101706	0.0275085	-0.0242632	-0.0682078	0.0463726	-0.0987507	0.0724428	0.064692	0.109711	0.231324	0.0901058	-0.0330318	0.0372838	0.00227494	0.169374	-0.0729266	0.0663572
	360	-0.0370542	-0.101175	-0.101919	-0.0331849	-0.0226855	-0.0911414	-0.0727354	0.0761616	0.102548	0.000468384	-0.060266	-0.0297527	-0.049006	-0.0566455	0.00987203	-0.0213757	-0.00390908	-0.00963567	-0.0349068	-0.0492958	-0.111071	-0.077379	-0.00941779	-0.0372177	0.0928835	0.177147	0.0881694	0.0563223	0.00983796	0.00776914	-0.0654993	-0.0245856	0.0203279	-0.0301811	-0.0805746	0.00684294	-0.117589	0.0613063	0.0777172	0.0971129	0.18238	0.0551731	-0.0427099	0.0400219	0.00162496	0.184087	-0.056244	0.0240306
	390	-0.0550587	-0.0981432	-0.105825	-0.0741273	-0.0451934	-0.0824516	-0.0931751	0.09114	0.0979324	0.00796253	-0.113051	0.0120683	-0.0110168	-0.0271426	0.0164534	-0.0386912	-0.019473	-0.0261702	-0.0310153	-0.0438464	-0.0884403	-0.0872572	-0.0231311	-0.0412832	0.0616913	0.158759	0.082678	0.0712421	-0.00418447	0.00776914	-0.076647	-0.0349964	0.0204989	-0.0358622	-0.0781963	0.0317566	-0.116102	0.00451027	0.0781996	0.0897638	0.217156	0.071612	-0.0368189	-0.0115457	0.00227494	0.142302	-0.0765014	0.0240306
	420	-0.040539	-0.114816	-0.0975779	-0.0712541	-0.036901	-0.0967643	-0.114612	0.0927681	0.135315	0.00983607	-0.0777224	0.0216274	-0.00848423	-0.0588582	-0.00767825	-0.0309291	-0.0162154	-0.0352928	-0.0808266	-0.0459423	-0.0540418	-0.0721106	-0.00861113	-0.0379569	0.0651571	0.185684	0.0653253	0.0202661	-0.0275552	0.00530275	-0.089426	-0.046475	0.00117967	-0.0323115	-0.0877093	0.0267739	-0.069998	0.0150899	0.0560085	0.0488189	0.213292	0.0325696	-0.0376604	-0.00743851	-0.0243744	0.121116	-0.118208	-0.0305844
	450	-0.0521547	-0.082986	-0.0763087	-0.0561701	-0.0404549	-0.0839851	-0.0946707	0.0983035	0.145468	0.0454333	-0.0752286	0.0252121	-0.032544	-0.0699218	-0.0149909	-0.0428708	-0.0082525	-0.0256001	-0.045803	-0.0580986	-0.0558523	-0.0925255	6.04997e-05	-0.0398049	0.0212569	0.194221	0.0703774	0.0600522	-0.0211004	-0.00628931	-0.0959515	-0.0550172	-0.0203621	-0.0384661	-0.0720129	0.0164762	-0.101725	0.0162036	0.0661392	0.0729659	0.1695	0.0346245	-0.0734273	-0.0165655	-0.0360741	0.13936	-0.102717	0.0158383
	480	-0.0591242	-0.112543	-0.0754406	-0.093521	-0.0600012	-0.0942085	-0.0772222	0.0937449	0.128854	0.0332553	-0.0989194	-0.0405066	-0.0971255	-0.0706594	-0.0244973	-0.0333174	-0.00571884	-0.00621472	-0.0528077	-0.047619	-0.0449896	-0.0635496	-0.0227277	-0.0520013	0.0408965	0.171236	0.0600536	0.0471217	-0.0331197	-0.0099889	-0.12586	-0.0667628	-0.0253201	-0.0410699	-0.0886606	-0.000132873	-0.0764426	-0.00996715	0.0926721	0.0246719	0.148892	0.0325696	-0.070061	-0.00150596	-0.0373741	0.129944	-0.132507	-0.0223921
	510	-0.056801	-0.0898067	-0.0888966	-0.0554518	-0.0594089	-0.0921638	-0.0931751	0.105141	0.158852	-0.00796253	-0.0972569	0.00370415	-0.032544	-0.0684467	-0.00182815	-0.0285407	0.00441581	-0.0119163	-0.0609799	-0.0513917	-0.0458948	-0.0707935	-0.00276282	-0.048675	0.0293438	0.197505	0.0681808	0.0210121	-0.0395744	-0.0151683	-0.14734	-0.0841141	-0.0154041	-0.0645047	-0.0620244	0.0144831	-0.0809042	-0.0233309	0.0598678	0.00787402	0.0999485	-0.0136649	-0.06417	-0.0252362	-0.0477738	0.105815	-0.136082	0.0308575
	540	-0.059705	-0.123911	-0.107127	-0.0892113	-0.0487473	-0.103921	-0.104641	0.103188	0.155621	0.0192037	-0.101413	0.0431354	-0.0502723	-0.0876235	0.0347349	-0.0458562	0.00622557	-0.0409944	-0.0423007	-0.0488766	-0.083009	-0.0977939	0.00268215	-0.0383265	0.0308842	0.157445	0.0633484	0.0409051	-0.0511485	-0.0149217	-0.16746	-0.0950589	-0.0468619	-0.0619008	-0.0686834	0.00717513	-0.0576046	-0.0333538	0.0309229	0.00577428	0.1051	0.0202404	-0.0805807	-0.0165655	-0.0607735	0.122881	-0.127741	-0.00873839
	570	-0.095133	-0.088291	-0.102787	-0.0726907	-0.0339395	-0.0921638	-0.0926766	0.105141	0.163005	0.00515222	-0.0752286	-0.0333373	-0.0350766	-0.0824605	-0.0135283	-0.0345116	-0.0151296	-0.0256001	-0.0193408	-0.0379779	-0.0676202	-0.0569641	-0.0069978	-0.0346306	0.0378158	0.198161	0.0530246	0.0242447	-0.0629452	-0.0245406	-0.174529	-0.110542	-0.0482296	-0.0815481	-0.0805746	-0.0184029	-0.0873488	-0.0266719	0.0482898	-0.056168	0.206852	-0.01161	-0.0709026	-0.0243235	-0.0757231	0.112877	-0.14204	0.000819224
	600	-0.0631897	-0.163319	-0.125358	-0.112197	-0.0659243	-0.112099	-0.10165	0.100257	0.17362	0.0238876	-0.0931006	0.00609392	-0.0160821	-0.0750848	0.0171846	-0.0130165	-0.0176632	0.0177319	-0.0434681	-0.0459423	-0.0694306	-0.041159	-0.029181	-0.0294563	0.0466728	0.184042	0.0694987	0.0411538	-0.0745192	-0.0521643	-0.200631	-0.113745	-0.0581457	-0.103326	-0.0938927	-0.000797236	-0.0814	-0.00606938	0.0362294	-0.0740157	0.134724	-0.0239392	-0.106249	-0.0275179	-0.0906727	0.113465	-0.177788	0.0322228
	630	-0.0347311	-0.104964	-0.11277	-0.0841833	-0.0120239	-0.110566	-0.12209	0.080069	0.163928	0.0360656	-0.103076	-0.0118294	-0.00215272	-0.10385	-0.0201097	-0.0249582	0.017808	-0.00906551	-0.0473596	-0.047619	-0.0639993	-0.055647	-0.00598947	-0.0353698	0.060536	0.162042	0.0416026	0.0304613	-0.0885417	-0.0622765	-0.190571	-0.14471	-0.0677198	-0.14262	-0.0848554	-0.0300292	-0.0630577	-0.0584108	0.0333349	-0.0834646	0.0793405	-0.0372958	-0.120555	-0.0548989	-0.0711732	0.101695	-0.21592	-0.00191152
	E,F - normalized apoplsatic pH signal - dorn1
	time [sec]	control																	50 µM Ado																			10 µM ATP
	-270	-0.02139	0.028079	-0.04248	0.00875	-0.02307	-0.02231	0.022702	-0.04265	-0.05996	-0.00277	-0.05289	0.006706	-0.01127	-0.04714	-0.02221	-0.03296	-0.0068	-0.02158	-0.03297	-0.05766	-0.07885	-0.115	-0.05331	-0.10371	-0.06099	-0.03446	-0.01312	0.013266	0.026931	0.036734	0.057698	0.006195	0.051127	0.152084	0.011863	0.053899	-0.05562	-0.01191	-0.02974	-0.03894	-0.04468	-0.05361	-0.01441	-0.00084	0.010874	-0.03827	0.005017	-0.07566
	-240	0.00329	0.041428	0.038223	-0.00337	0.017586	-0.07305	0.051783	-0.07713	-0.01162	0.036341	-0.01536	0.011906	-0.01768	-0.02425	-0.04444	-0.10704	-0.01983	-0.04172	-0.00383	-0.04722	-0.07962	0.001481	-0.01704	-0.01303	0.013867	0.012174	-0.02189	-0.06407	0.015193	-0.01075	-0.00466	0.003754	0.009623	-0.03345	0.004553	-0.02079	-0.00411	-0.03622	-0.05574	-0.09861	-0.00802	-0.01587	-0.02064	0.043833	-0.00909	0.013462	-0.01208	-0.0465
	-210	0.077487	0.000913	0.030957	-0.05957	0.021579	0.022251	0.010972	0.023083	-0.0368	0.015646	-0.01594	-0.00123	-0.00079	-0.05593	-0.00554	-0.0507	0.009044	-0.0264	-0.04298	-0.04066	-0.05076	-0.01234	0.002015	-0.0425	-0.03172	0.003829	-0.01373	0.007764	-0.01835	0.000205	0.018345	0.001007	0.001629	-0.02188	0.018509	-0.01134	-0.01965	-0.0469	0.005757	0.001178	-0.05982	-0.03093	0.004966	0.033906	0.017111	0.049615	0.015367	-0.02909
	-180	-0.02396	-0.05037	-0.06661	-0.02784	0.005245	0.051223	0.007796	0.070404	0.036719	0.019967	0.030628	0.013822	0.003582	0.019298	-0.01063	-0.05509	-0.01201	0.003375	-0.05733	0.03476	-0.01056	0.017769	0.013006	-0.017	0.042656	-0.02661	0.041906	-0.03075	0.000771	0.023949	0.016528	-0.01242	-0.03219	-0.04733	0.055395	-0.04549	-0.00233	-0.03213	0.030932	-0.00409	-0.03049	-0.02026	0.00697	-0.0314	0.012329	-0.04286	-0.02941	0.021944
	-150	0.028822	-0.04288	0.029919	0.036079	0.019764	-0.02628	-0.02691	0.016231	0.073378	-0.02324	-0.0048	-0.01765	-0.02059	-0.0408	-0.04305	0.010755	-0.01682	-0.05675	-0.00774	-0.03768	-0.01005	-0.00148	0.028393	-0.0102	-0.02164	0.01561	0.014694	0.049945	-0.03746	0.043355	0.016528	0.062349	0.001322	-0.0168	0.009537	0.025547	0.002554	0.01968	0.029694	-0.01713	-0.01086	0.009853	0.002516	0.008046	-0.01262	-0.03987	-0.00781	0.036291
	-120	0.007745	-0.02578	0.017464	-0.01042	-0.03486	0.056223	-0.05037	-0.05186	-0.03922	-0.03802	-0.00879	-0.05214	-0.00923	-0.01546	-0.00229	0.005634	0.022078	0.021525	0.040978	0.019258	0.054625	-0.00049	-0.04158	0.009351	-0.04947	-0.00795	0.051279	0.04322	0.014187	-0.01235	-0.00224	-0.04324	-0.02174	-0.02512	-0.02004	-0.01012	0.010325	-0.02259	0.021234	0.041797	0.009485	0.010424	-0.00661	0.026592	0.007547	0.058403	-0.00038	-0.01004
	-90	-0.01522	-0.00588	-0.03755	0.044233	0.035916	0.04284	-0.04939	0.008094	0.000665	-0.06964	0.002475	-0.01546	0.044646	0.034631	0.021098	0.022461	0.048748	0.050452	0.026188	0.046983	0.042257	0.044423	0.027294	0.03032	-0.01348	-0.02808	0.015299	0.004402	0.022906	-0.00664	-0.03493	-0.00449	-0.00759	-0.00569	-0.04263	-0.00311	0.014544	0.040814	0.009678	0.034275	0.033137	0.028148	-0.02532	-0.02617	0.031041	0.012064	0.009967	0.016535
	-60	-0.01042	-0.01033	-0.01809	0.005003	-0.02361	0.000485	0.01977	0.0006	-0.06963	-0.02006	0.037432	0.063911	0.019017	0.036062	0.0519	0.083187	0.008242	-0.0057	0.083174	0.006141	0.061582	0.014808	0.077487	0.071975	0.034499	0.039171	-0.04699	-0.04389	0.014187	-0.04249	-0.04946	-0.00937	0.004396	-0.01124	-0.04862	0.01945	0.025203	-0.00191	-0.01859	0.039791	0.03432	0.037486	0.010756	-0.0455	0.035408	0.020852	0.020091	0.021474
	-30	-0.03818	0.039788	0.036407	0.021092	-0.05573	-0.06893	0.034921	0.080468	0.088082	0.018148	0.0101	-0.01273	-0.02758	0.043626	0.006739	0.065445	-0.00459	0.04081	-0.01079	0.017171	0.026024	-0.00938	-0.01154	0.03117	0.041697	0.028863	0.000786	0.039858	-0.02036	-0.01783	-0.03796	-0.00082	0.005319	0.009578	0.013192	-0.04122	0.017431	0.032633	0.022884	0.056089	0.009012	0.00223	0.037255	0.00909	-0.08331	-0.04886	0.006142	0.036997
	0	-0.00819	0.025035	0.011755	-0.01395	0.037186	0.017545	-0.02128	-0.02724	0.01839	0.063631	0.017138	0.002874	0.019891	0.049963	0.048426	0.058311	-0.02805	0.035989	0.005307	0.058908	0.045349	0.060217	-0.02473	0.043638	0.044576	-0.00255	-0.02824	-0.01975	-0.01801	-0.01418	0.020161	-0.00296	-0.0119	-0.00014	-0.00176	0.033169	0.011658	0.05854	-0.01612	-0.01437	0.067906	0.032531	0.00452	-0.01755	-0.00929	0.01546	-0.00691	0.028059
	30	-0.14236	0.063675	0.005008	0.033875	-0.05465	-0.06466	0.048606	-0.03088	0.059883	-0.02392	0.024294	0.035172	-0.00486	0.024409	-0.00276	0.091235	-0.01061	0.002808	0.058813	0.07113	0.103324	0.014314	0.01667	0.112496	0.067127	-0.03839	-0.02491	-0.0228	0.015528	-0.00984	-0.0864	0.000397	-0.00237	-0.00106	-0.0011	-0.0028	0.03142	0.01309	0.014218	-0.01161	0.034793	-0.06771	-0.07943	-0.07345	-0.09683	-0.00292	-0.09533	-0.03639
	60	-0.06285	0.06508	-0.08088	-0.0091	0.05715	0.010045	-0.06943	0.02972	0.009527	0.063177	0.062652	0.064732	0.076099	0.024614	-0.01179	0.047886	-0.00399	0.060378	0.079694	0.106606	0.033497	0.064659	0.007877	0.108813	0.077204	-0.01041	0.034347	0.026715	0.009827	-0.03998	-0.02282	-0.04447	-0.03004	0.058622	-0.02535	0.033474	-0.00588	0.07263	0.005138	-0.03342	0.061283	-0.08143	-0.10281	-0.11786	-0.06751	-0.00811	-0.06653	-0.03121
	90	-0.07039	0.129248	-0.01575	-0.02585	0.08038	0.051811	0.019525	0.026294	0.085061	0.072728	0.024176	0.031614	0.035326	0.055687	-0.00878	0.016791	-0.06315	0.034571	0.014007	0.103923	0.02654	-0.02813	-0.00934	0.026353	0.116069	-0.06489	-0.01494	-0.03564	0.002113	-0.02217	0.026215	-0.00784	-0.04387	0.016518	-0.00774	-0.02933	-0.00056	0.022407	-0.04501	-0.02389	0.055843	-0.09877	-0.06362	-0.12779	-0.10701	-0.06683	-0.08453	-0.05426
	120	-0.03646	-0.00049	-0.00459	0.023296	0.005971	-0.06231	0.002419	0.051133	0.075997	0.106158	0.004352	0.083071	0.072021	0.109453	0.015077	0.069835	-0.02204	0.014152	8.7e-05	0.046387	0.024994	0.038006	0.044147	0.053273	0.056571	-0.0217	0.019834	-0.02372	-0.01835	-0.0466	-0.05128	0.002228	-0.04602	-0.07833	-0.04463	-0.00524	0.00322	0.064449	0.002662	0.089186	0.03361	-0.1104	-0.11595	-0.12674	-0.1066	-0.12436	-0.06405	-0.04862
	150	-0.07622	-0.02789	-0.06064	-0.04635	0.081832	0.001662	0.042497	-0.08441	0.062703	0.133221	0.037666	0.104968	0.053091	0.110271	-0.00739	0.063982	-0.07217	0.030033	0.012702	0.040126	0.031951	0.014808	0.08115	0.070275	0.217792	0.043098	-0.02582	-0.00507	-0.04954	-0.02171	-0.02948	-0.01364	-0.01436	-0.01911	-0.03566	-0.0153	0.026535	0.073084	-0.00373	-0.03016	0.093924	-0.11612	-0.11306	-0.12753	-0.09579	-0.07802	-0.0978	-0.05802
	180	-0.02516	0.018477	-0.01393	0.063628	0.044446	-0.0126	-0.04865	0.002313	-0.00195	-0.01369	0.045291	0.106336	0.0694	0.055278	0.008592	0.038008	-0.03106	-0.04058	0.053593	0.121512	0.025251	0.038006	0.022898	0.073959	0.092558	-0.0055	-0.03157	0.041692	-0.06731	-0.08198	-0.01919	-0.02768	-0.03127	-0.04086	-0.0536	0.001158	0.014544	0.03786	-0.03634	-0.00283	0.087538	-0.10087	-0.11217	-0.08756	-0.11367	-0.08181	-0.10433	-0.10506
	210	-0.1194	0.054074	-0.04455	-0.01373	0.069309	-0.02481	-0.01053	-0.02702	0.030878	0.077959	0.052212	0.080334	0.040277	0.113542	0.002339	0.085382	-0.09042	0.00139	0.052723	0.083949	-0.0304	0.007404	-0.04928	0.054973	0.145818	-0.06686	-0.05213	0.033439	0.000101	-0.05641	-0.01193	0.001923	-0.0119	-0.04641	-0.04729	-0.05158	-0.00944	0.07672	-0.03221	-0.00133	0.066487	-0.14947	-0.14668	-0.16305	-0.11824	-0.18927	-0.13335	-0.11682
	240	-0.03441	0.036041	-0.00407	0.035638	0.10851	-0.02452	0.088439	0.003169	0.036518	0.122533	0.064529	0.150951	0.053965	0.098618	-0.06575	0.037826	-0.08159	0.010465	0.084044	0.059802	0.021644	0.072063	-0.01374	0.071975	0.103594	-0.05115	-0.0234	0.023658	-0.04115	-0.09454	-0.03978	-0.02432	-0.05402	-0.03947	0.03014	0.006646	-0.03542	0.009908	-0.06935	-0.08006	0.005937	-0.10888	-0.12553	-0.21347	-0.08664	-0.10738	-0.07283	-0.12929
	270	-0.07536	0.07515	0.001116	-0.00447	0.080924	-0.05305	-0.00858	0.075971	0.054847	0.118894	0.049748	0.130697	0.051053	0.060389	-0.02777	0.055934	-0.0846	-0.03831	-0.01775	-0.01979	-0.05875	0.076012	-0.01044	0.094644	0.160693	-0.07471	-0.05122	0.057281	-0.03679	-0.05048	-0.07126	0.02298	-0.01897	-0.0825	-0.05991	-0.05859	-0.00966	0.100809	-0.03737	-0.03317	0.0329	-0.13822	-0.14156	-0.1654	-0.10389	-0.11177	-0.123	-0.11918
	300	-0.08239	-0.00845	-0.06505	0.054372	0.020853	-0.05511	0.040786	-0.0358	0.042762	0.135495	0.057373	0.149035	0.058916	0.097187	-0.04861	0.015694	-0.06134	0.0479	0.067948	0.055927	-0.01134	0.043435	0.020333	0.05894	0.153975	-0.02022	-0.00345	-0.03136	-0.02405	-0.06897	-0.02161	0.001923	-0.0325	-0.04456	-0.03998	-0.00738	-0.00255	0.030588	-0.04439	-0.03443	0.069089	-0.17272	-0.16405	-0.16854	-0.21284	-0.19127	-0.11018	-0.14622
	330	-0.09181	0.0248	-0.0526	0.016904	0.000526	-0.09437	-0.03204	0.029506	0.042762	0.137087	0.063121	0.075407	-0.01855	0.060389	-0.03703	0.02429	-0.10125	0.000822	0.000957	0.009719	-0.06313	0.052813	-0.01923	0.049022	0.172688	0.016591	-0.05878	-0.01272	-0.01298	-0.05162	-0.02525	-0.03439	-0.03957	-0.01957	-0.06158	-0.03573	0.016543	0.122625	-0.06461	-0.08031	0.080442	-0.13174	-0.1037	-0.15496	-0.12448	-0.13115	-0.09195	-0.09636
	360	-0.09593	0.051029	-0.08322	0.048641	0.094717	0.024751	-0.01664	0.081752	0.081838	0.158237	0.057608	0.123033	0.021638	0.04015	0.012529	0.068737	-0.04049	0.032869	0.040543	0.090508	-0.02989	0.047878	-0.01704	0.090677	0.123267	-0.04919	-0.02703	0.060337	-0.0596	-0.11052	-0.04886	-0.05301	-0.05432	-0.07371	-0.06689	-0.06835	0.002998	0.040133	-0.03118	-0.02615	0.067433	-0.14489	-0.12731	-0.1048	-0.12593	-0.14952	-0.11265	-0.12623
	390	-0.11477	-0.01852	-0.00018	-0.00602	0.054246	-0.01481	0.057648	0.085392	-0.00618	0.157555	0.073796	0.115369	0.026589	0.050372	-0.02105	0.040386	-0.06996	-0.00769	0.053158	0.051455	-0.05617	-0.02369	-0.05184	0.065174	0.106953	-0.05557	-0.04547	0.022436	-0.02572	-0.07719	-0.00648	-0.06796	-0.07554	-0.11165	-0.04363	-0.08725	0.010103	-0.01168	-0.07782	-0.06351	0.02273	-0.12222	-0.11573	-0.14242	-0.14132	-0.1663	-0.10163	-0.08296
	420	-0.07571	0.06672	-0.09178	0.087651	0.089454	-0.03422	0.05496	0.042568	0.080428	0.130265	0.065232	0.128233	0.023968	0.075313	-0.02823	0.066908	-0.07257	0.018122	0.105359	0.033866	-0.07034	-0.00395	-0.01997	0.007934	0.133823	-0.03593	-0.02945	0.014488	-0.04149	-0.07491	0.018345	-0.01303	-0.05371	-0.01818	-0.04164	-0.02323	-0.03342	0.085356	-0.05099	0.020485	0.038814	-0.1691	-0.14245	-0.21817	-0.12676	-0.1655	-0.1158	-0.10695
	450	-0.0973	0.079834	-0.0321	0.039825	0.040816	-0.03937	0.04323	-0.09083	0.018793	0.109342	0.077315	0.082524	0.035909	0.063456	-0.05162	0.052458	-0.09924	0.006211	-0.03384	-0.02933	-0.09611	0.054294	0.010075	0.093228	0.16933	0.022482	-0.04759	0.005013	-0.04987	-0.03975	-0.0307	-0.00082	-0.1069	-0.09915	-0.02403	-0.05189	-0.05429	0.076948	-0.04913	-0.01763	0.020601	-0.13937	-0.13755	-0.09958	-0.15026	-0.15192	-0.10095	-0.12035
	480	-0.05994	-0.0033	-0.00823	-0.00293	0.042268	-0.01569	-0.01909	0.051775	0.047395	0.145047	0.086112	0.078144	0.049597	0.064273	0.007434	0.074773	-0.10546	0.01245	0.097529	0.004352	-0.08889	0.05232	-0.00092	0.047322	0.16837	-0.07618	-0.00587	0.010209	-0.05591	-0.05664	-0.0864	-0.10276	-0.07339	-0.06306	-0.03233	-0.07871	-0.08205	0.035133	-0.06193	-0.08558	0.041415	-0.16281	-0.17518	-0.12413	-0.13799	-0.16051	-0.11423	-0.10977
	510	-0.09644	0.029718	-0.08062	0.024618	0.08655	-0.03599	0.099924	0.002741	-0.00679	-0.00323	0.056317	0.158068	0.03387	0.080628	-0.05579	0.012218	-0.084	0.01557	-0.0134	-0.02248	-0.07524	-0.01579	-0.01557	0.070558	0.128065	-0.03839	0.001996	0.037719	-0.04283	-0.11029	-0.0531	-0.04813	-0.06754	-0.10378	-0.08351	-0.03786	-0.04363	0.021498	-0.0382	-0.01587	0.013032	-0.15347	-0.13488	-0.17167	-0.15795	-0.15272	-0.11963	-0.13282
	540	-0.13105	0.026674	-0.03885	-0.01131	0.001978	-0.06908	-0.0357	0.024367	-0.02794	0.082962	0.100423	0.097851	0.046684	0.08165	-0.01549	0.03874	-0.11448	0.003091	0.124935	0.012998	-0.06467	0.041461	-0.04268	0.023519	0.144859	-0.03986	-0.01584	0.021519	-0.04987	-0.09408	-0.08882	-0.0762	-0.07707	-0.07185	-0.07586	-0.07689	-0.07672	-0.01554	-0.07183	-0.06025	-0.03475	-0.15595	-0.12998	-0.10637	-0.12739	-0.20904	-0.09443	-0.10083
	570	-0.07022	0.053605	-0.0731	-0.02056	0.033375	-0.06775	-0.07407	0.031433	-0.03821	0.033157	0.050921	0.102231	0.052509	0.062434	-0.08057	0.060689	-0.10947	0.013868	0.063163	0.047877	-0.04303	0.070089	-0.00458	0.062907	0.143899	-0.01875	0.001088	0.003179	-0.08509	-0.07742	0.006236	-0.04324	-0.05924	-0.03391	-0.03499	-0.06469	-0.05696	0.004227	-0.04315	-0.01387	0.043308	-0.15576	-0.10504	-0.05648	-0.13113	-0.18428	-0.06338	-0.09965
	600	-0.11923	-0.04218	-0.05182	0.008529	0.061142	-0.03246	-0.01982	0.100595	0.01275	0.000637	0.077315	0.194197	-0.02379	0.067953	-0.01619	0.048434	-0.07899	-0.04257	0.117105	0.037741	-0.07885	0.015301	-0.03169	0.113347	0.122307	-0.0325	-0.05666	0.05667	-0.05524	-0.05093	-0.06763	-0.0817	-0.04664	-0.04733	-0.03831	-0.0967	-0.04097	0.000364	-0.08607	-0.10914	-0.01251	-0.11707	-0.07654	-0.0779	-0.1145	-0.11057	-0.0879	-0.0378
	630	-0.1266	0.089436	-0.08166	0.096908	-0.02397	-0.03128	-0.0682	0.02244	0.018188	0.05408	0.090453	0.128781	0.022803	0.020116	-0.04027	0.04752	-0.08982	0.032302	-0.02732	-0.0195	-0.10255	0.033564	0.032057	0.067158	0.134303	-0.09385	0.027998	0.036496	-0.08441	-0.07148	-0.06218	-0.05271	-0.11858	-0.04086	-0.04961	-0.0467	-0.06517	0.04536	-0.06894	-0.07204	0.014452	-0.10811	-0.11306	-0.07502	-0.14631	-0.16251	-0.13582	-0.07684
[truncated: 59 more columns]
