# Supplementary material for: Soil-borne fungi alter the apoplastic purinergic signaling in plants by deregulating the homeostasis of extracellular ATP and its metabolite adenosine
Source: eLife. 2023 Nov 23;12:e92913. doi: 10.7554/eLife.92913 (PMC10746138; doi:10.7554/eLife.92913)
Supplement: Figure 5—source data 1. [file elife-92913-fig5-data1.xlsx]

## Sheet: Sheet1
Figure 5-source data 1
	relative expression of defense genes upon infection
		DORN1
		rel. expression to GAPDH
		WT			ent3nsh3
	mock	0.00893111	0.0041852	0.0106602	0.015036	0.023997	0.0174739	0.0261735
	Fo5176	0.0349966	0.0352311	0.0217096	0.00667945	0.00569026	0.00267543	0.00697578
		WRKY45
		rel. expression to GAPDH
		WT			dorn1				ent3nsh3
	mock	0.0302147	0.0254835	0.0531249	0.0431904	0.0201719	0.0956155	0.0369172	0.024401	0.0567939	0.0253139	0.136677
	Fo5176	0.482906	0.309734	0.366014	0.0817279	0.0566045	0.0445081	0.0320865	0.0556673	0.0482217	0.0291251	0.0722294
		WRKY53
		rel. expression to GAPDH
		WT			dorn1				ent3nsh3
	mock	0.00134032	0.00091293	0.00486378	0.0151368	0.00773656	0.0172421	0.00600254	0.00843825	0.0105892	0.00407488	0.0137397
	Fo5176	0.0527713	0.0384265	0.0585265	0.00829854	0.00205508	0.0051136	0.00126213	0.0103792	0.00241233	0.00185299	0.00324715
		AT1G51890
		rel. expression to GAPDH
		WT			dorn1				ent3nsh3
	mock	0.00860902	0.00765945	0.0177089	0.0136028	0.00843825	0.0274261	0.00957986	0.0144937	0.0151874	0.00586386	0.0123061
	Fo5176	0.0888433	0.03488	0.0583314	0.011059	0.0116659	0.0143973	0.00872478	0.0117441	0.0121429	0.0115496	0.0191865
