# Supplementary material for: Soil-borne fungi alter the apoplastic purinergic signaling in plants by deregulating the homeostasis of extracellular ATP and its metabolite adenosine
Source: eLife journal article supplement (doi:10.7554/elife.92913), 2023-11-23
Supplement: supp [file elife-92913-supp-v1.zip]

**Figure 1-Figure supplement 1: NMR data of Ado**

The chemical shifts of  $^1\text{H}$  and  $^{13}\text{C}$  found in Ado. Blanks are heteroatoms in the main chain. Selected COSY and HMBC correlations are included to demonstrate linkage.

| Atom | $\delta^{13}\text{C}$ | $\delta^1\text{H}$                    | HMBC     | COSY   |
|------|-----------------------|---------------------------------------|----------|--------|
| 1    |                       |                                       |          |        |
| 2    | 152.4                 | 1H 8.13 (s)                           | 4, 6     |        |
| 3    |                       |                                       |          |        |
| 4    | 149.1                 | -                                     |          |        |
| 5    | 119.1                 | -                                     |          |        |
| 6    | 156.1                 | -                                     |          |        |
| 7    |                       |                                       |          |        |
| 8    | 139.7                 | 1H 8.34 (s)                           | 4, 5     |        |
| 9    |                       |                                       |          |        |
| 1'   | 90.8                  | 1H 5.95 (d, $J=3.9\text{Hz}$ )        | 4, 8, 2' | 2'     |
| 2'   | 81.1                  | 1H 4.52 (dd, $J=6.3, 3.9\text{ Hz}$ ) |          | 1', 3' |
| 3'   | 77.1                  | 1H 4.22 (dd $J=6.3, 3.8\text{ Hz}$ )  |          | 2', 4' |
| 4'   | 87.7                  | 1H 3.93 (q $J=3.8\text{ Hz}$ )        |          | 3', 5' |
| 5'   | 62.4                  | 1H 3.61 (m), 1H 3.50 (m)              |          | 5', 4' |
