# Supplementary figures and images for: Soil-borne fungi alter the apoplastic purinergic signaling in plants by deregulating the homeostasis of extracellular ATP and its metabolite adenosine
Source: eLife journal article supplement (doi:10.7554/elife.92913), 2023-11-23

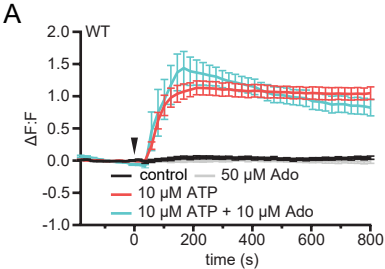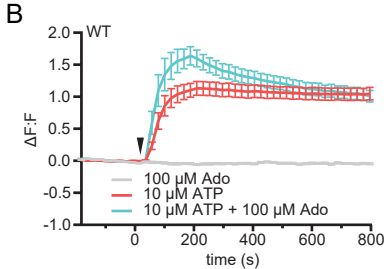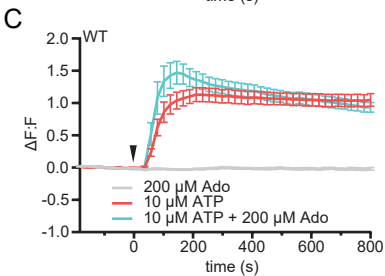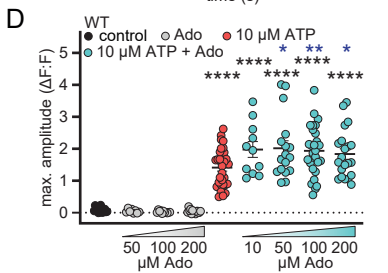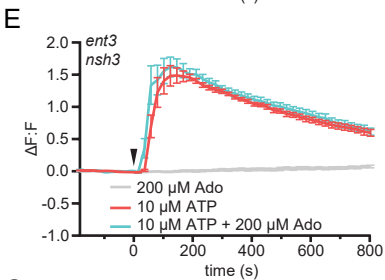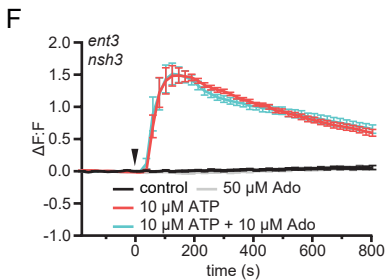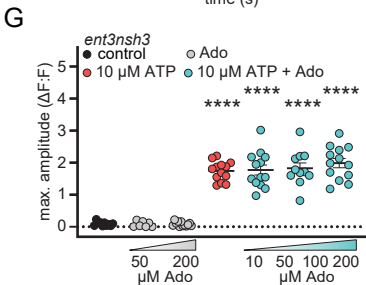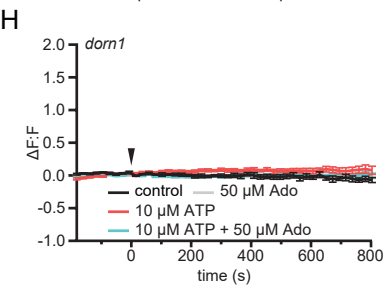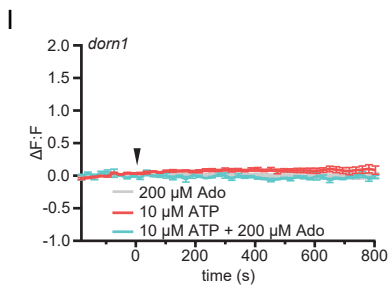

Supplement: supp [file elife-92913-supp-v1.zip]

**A**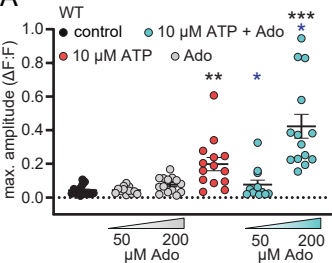**B**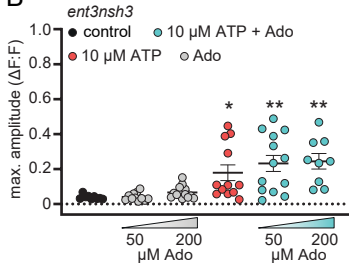**C**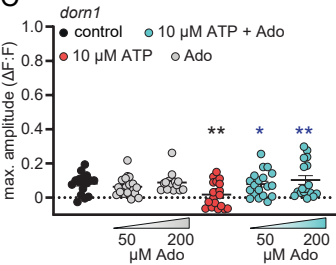**D**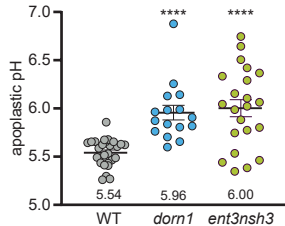

Supplement: supp [file elife-92913-supp-v1.zip]

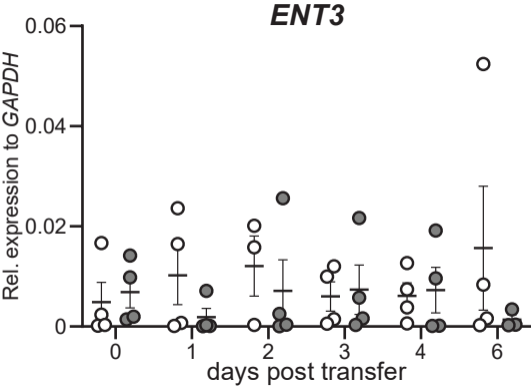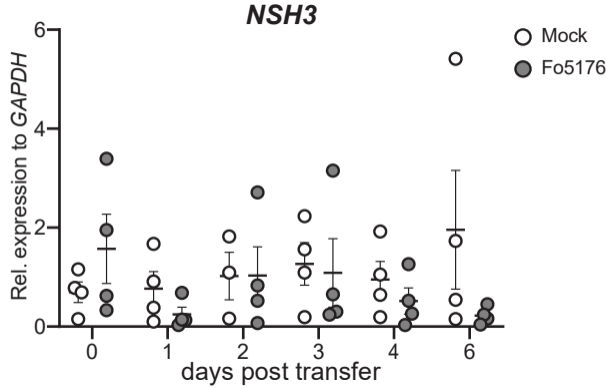

Supplement: supp [file elife-92913-supp-v1.zip]

**A**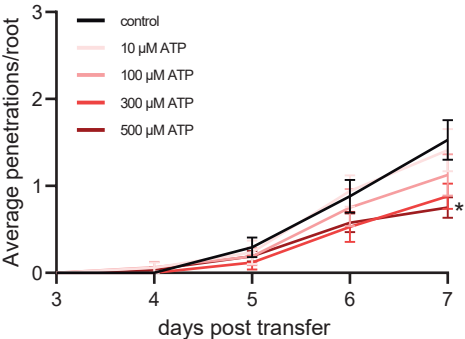**B**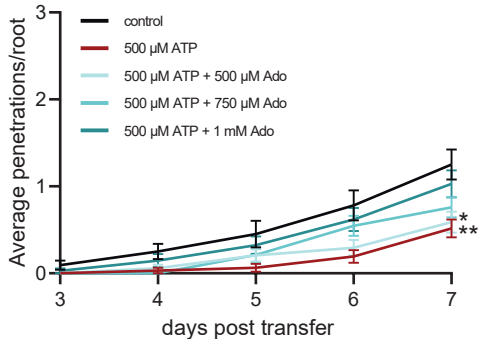

Supplement: supp [file elife-92913-supp-v1.zip]
